# Supplementary material
Source: publisher figshare collection journal article supplement (https://karger.figshare.com/articles/dataset/_/5442418)

CHROMOSOME : chr1  
Length : 245522847 bp

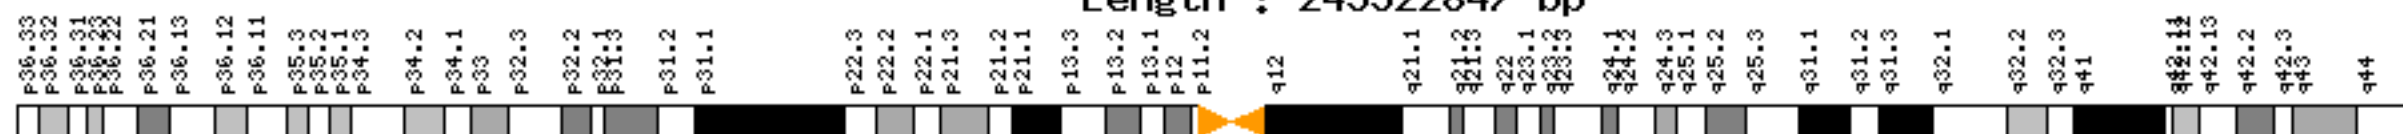

G  
MSA

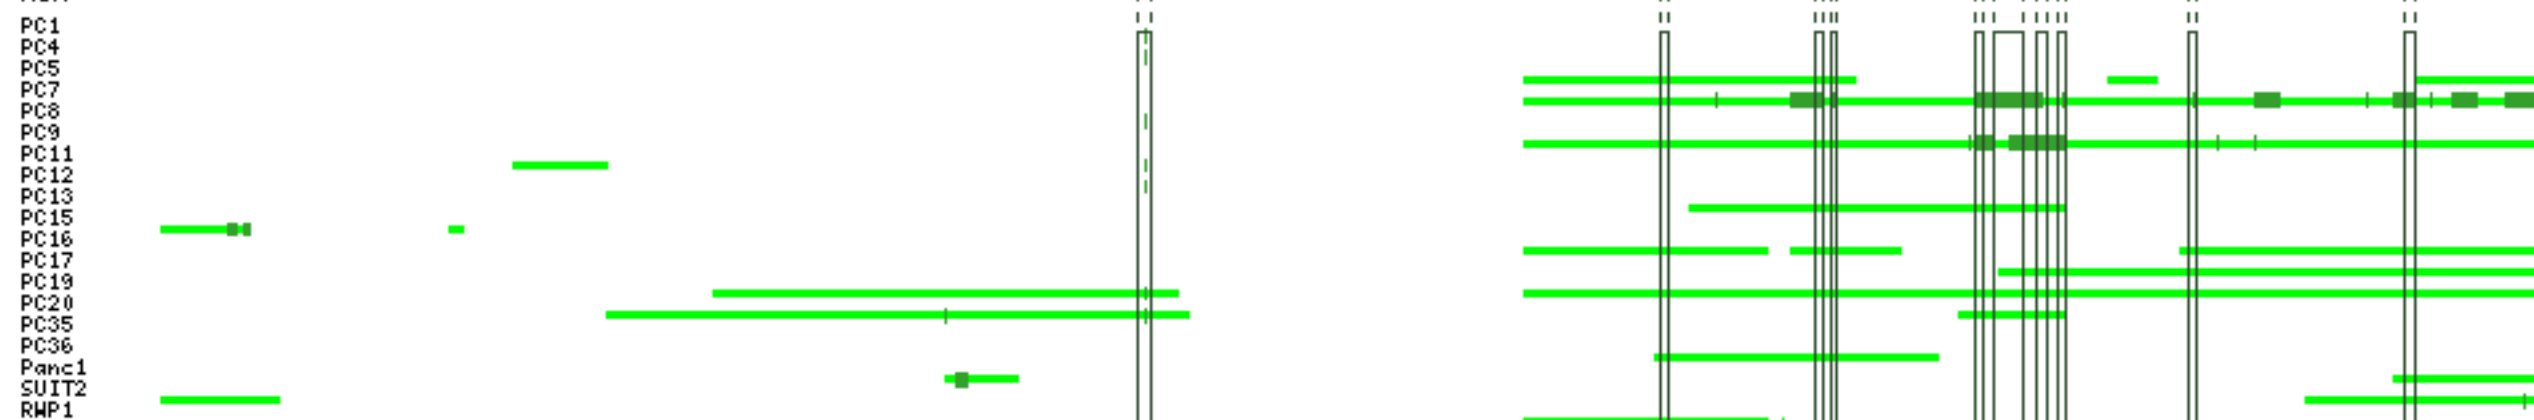

L  
MSA

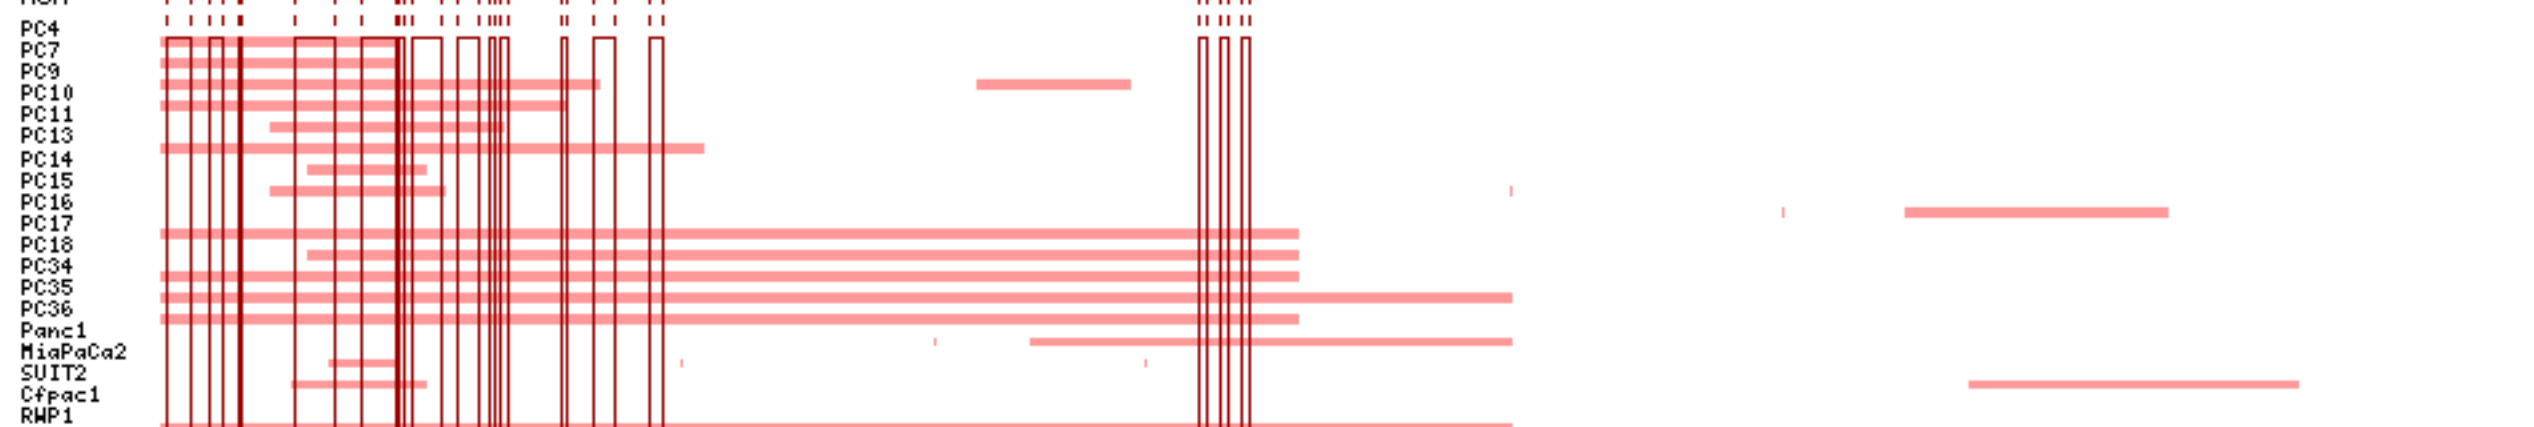

Redon et al., 2006

Gain

Loss

Multi-allelic or Complex

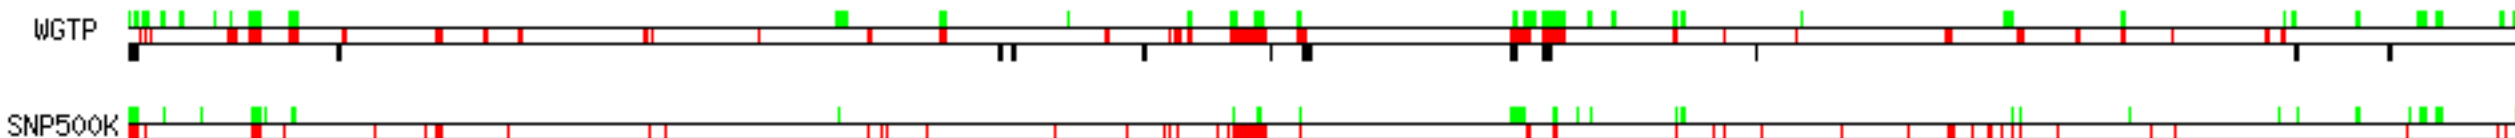

Mb

0 25 50 75 100 125 150 175 200

CHROMOSOME : chr2  
Length : 243018229 bp

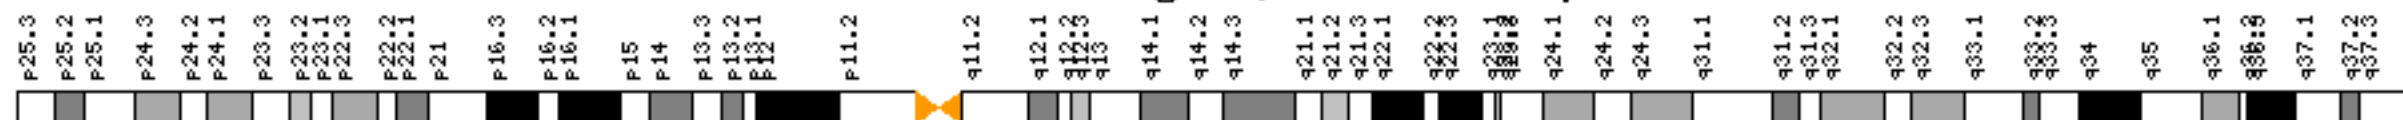

G

MSA

PC5

PC6

PC7

PC9

PC11

PC18

PC19

L

MSA

PC3

PC5

PC7

PC8

PC11

PC14

PC15

PC19

PC20

MiaPaCa2

SUIT2

Cfpacl

Redon et al., 2006

Gain

Loss

Multi-allelic or Complex

WGTP

SNP500K

Mb

0

25

50

75

100

125

150

175

200

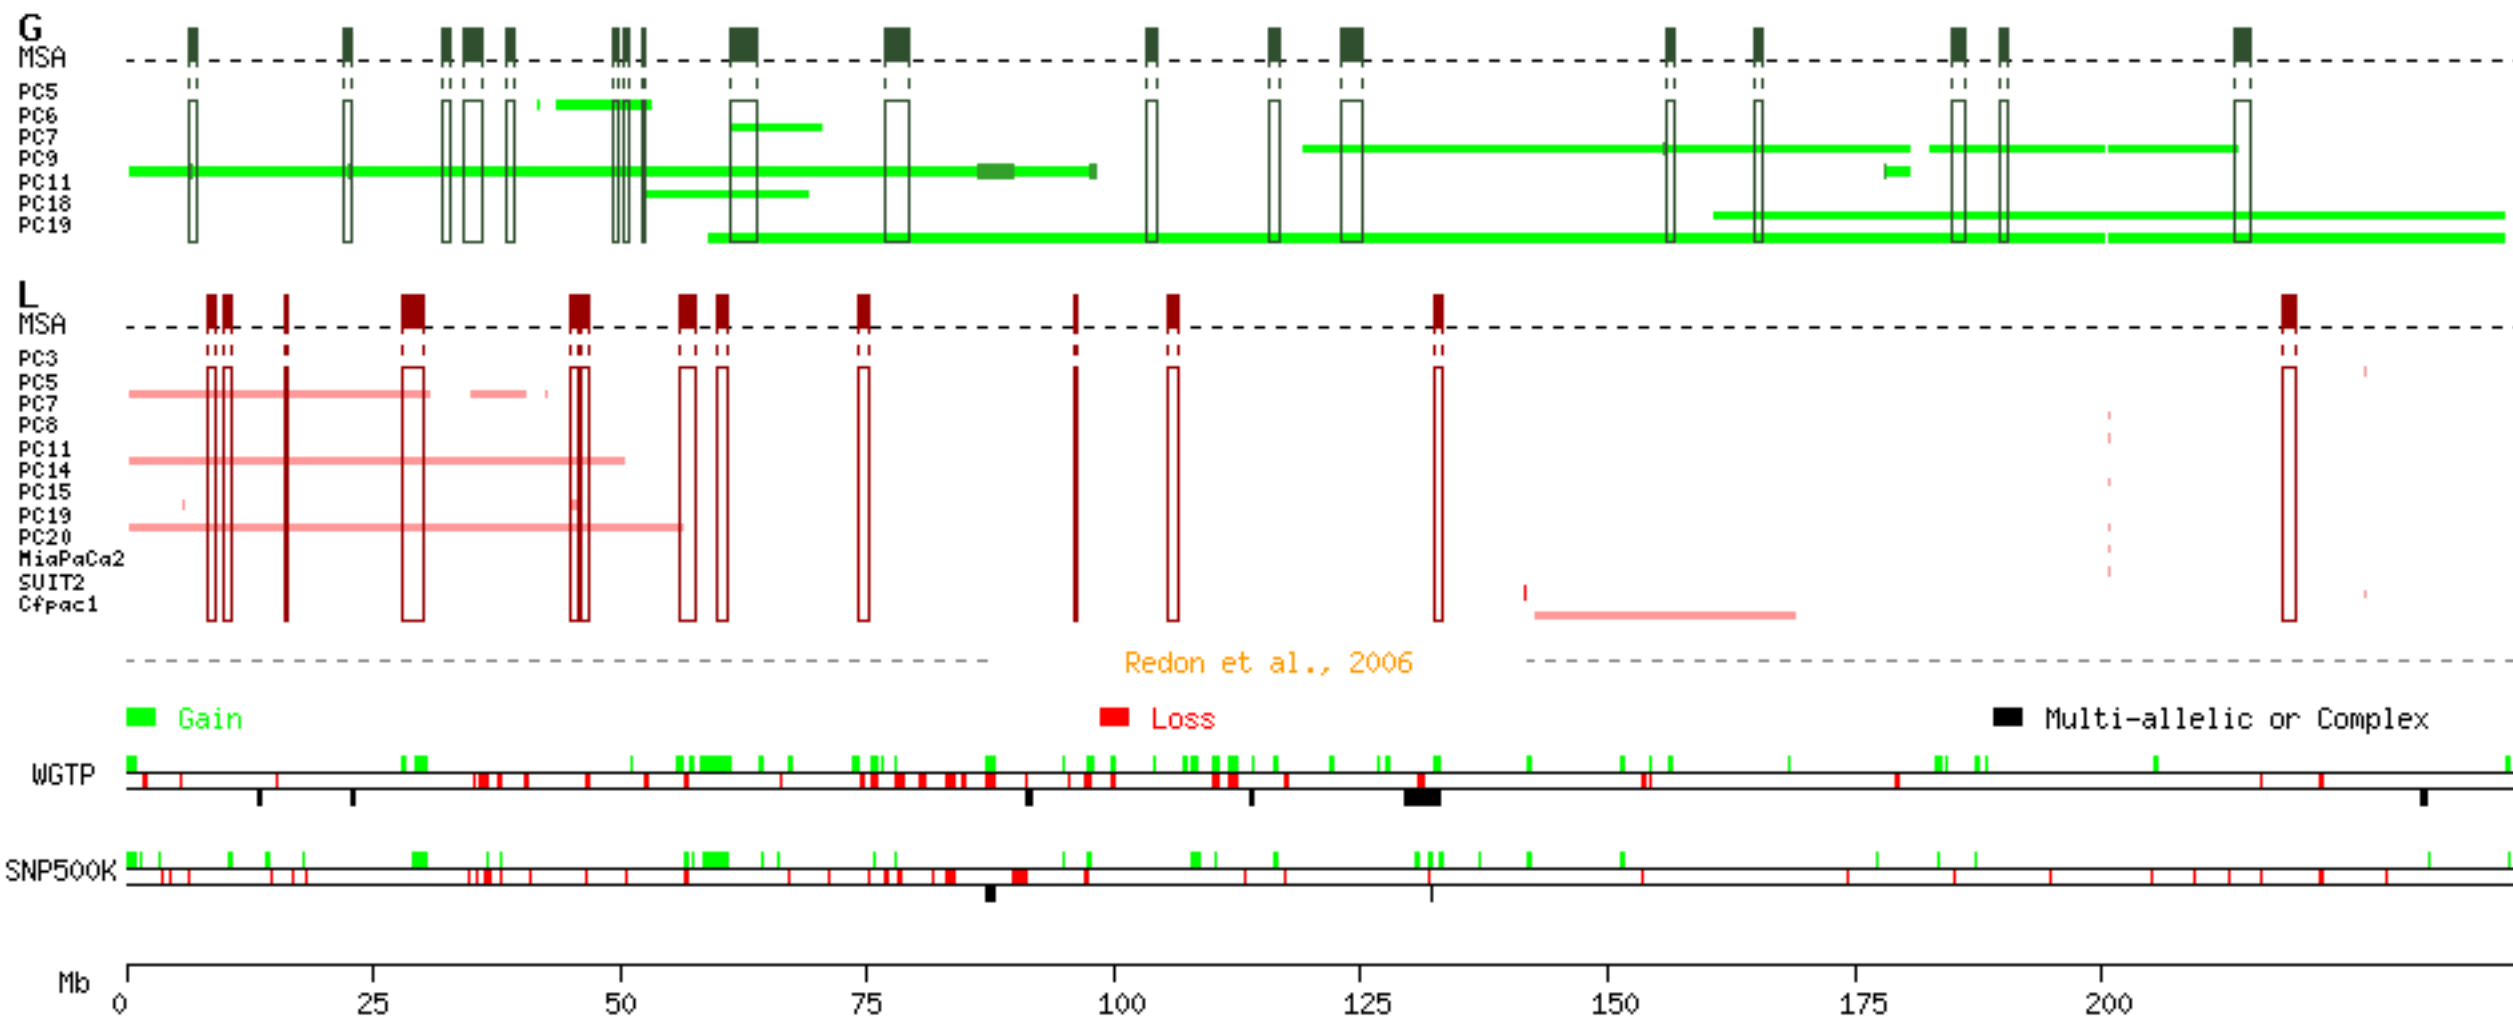

CHROMOSOME : chr3  
Length : 199505740 bp

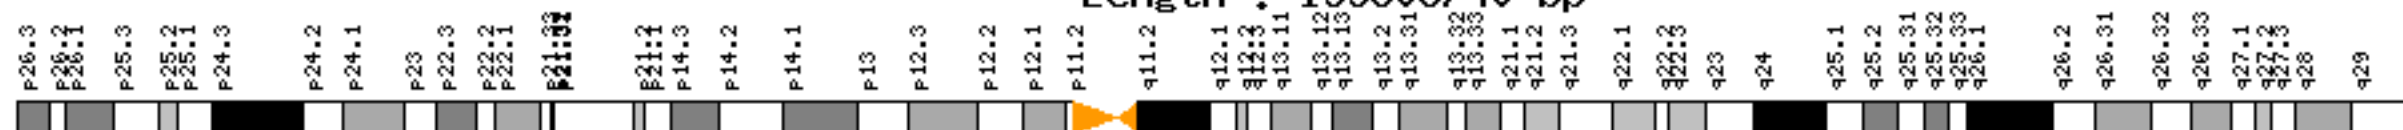

**G**  
MSA

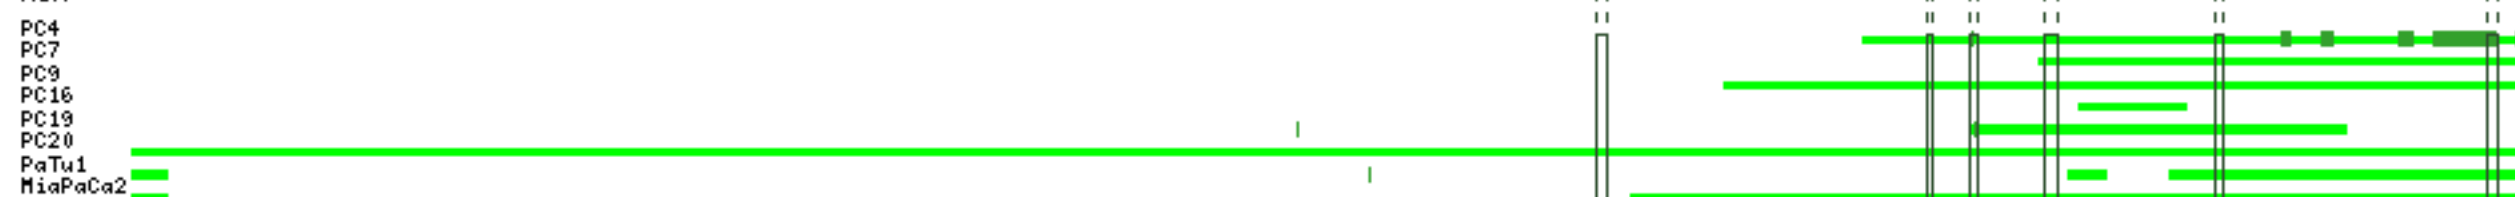

**L**  
MSA

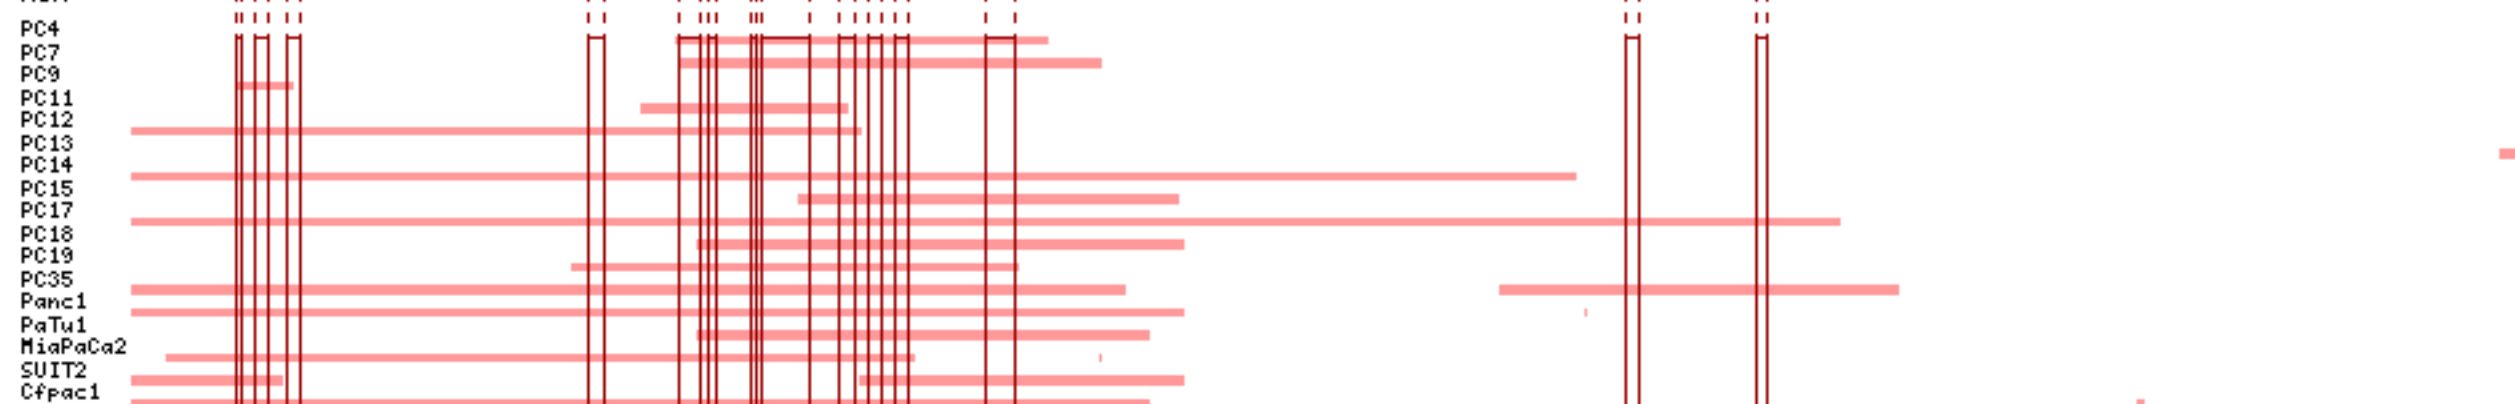

Redon et al., 2006

■ Gain ■ Loss ■ Multi-allelic or Complex

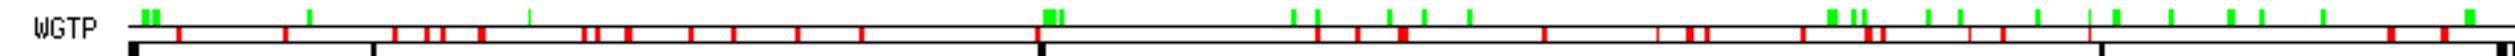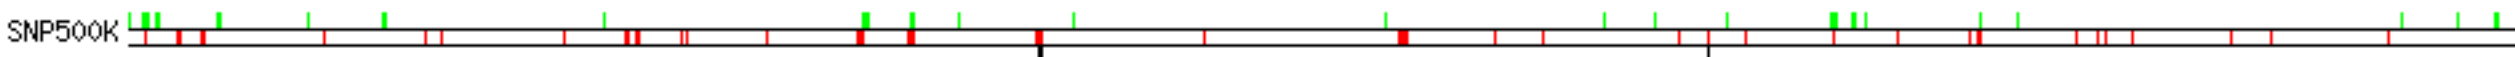

Mb 0 25 50 75 100 125 150 175

CHROMOSOME : chr4  
Length : 191411218 bp

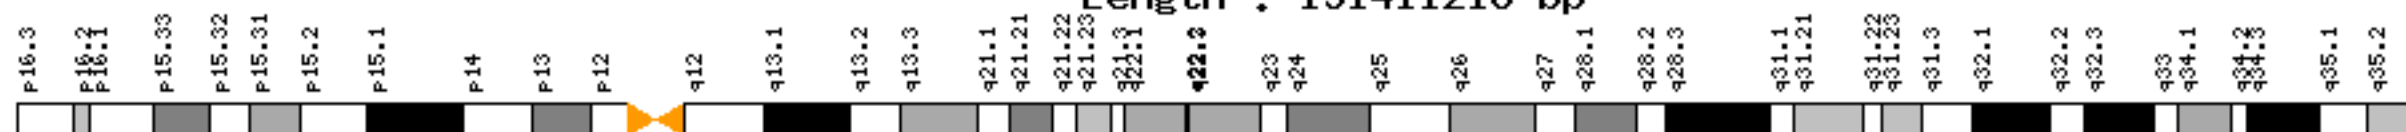

**G**  
MSA  
PC5  
PC9  
PC17  
PC34  
PaTu1

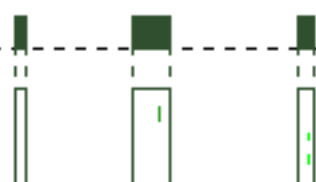

**L**  
MSA  
PC3  
PC7  
PC9  
PC10  
PC11  
PC12  
PC13  
PC15  
PC16  
PC17  
PC18  
PC19  
PC20  
PC36  
Panc1  
MiaPaCa2  
SUIT2  
CfPac1  
RWP1

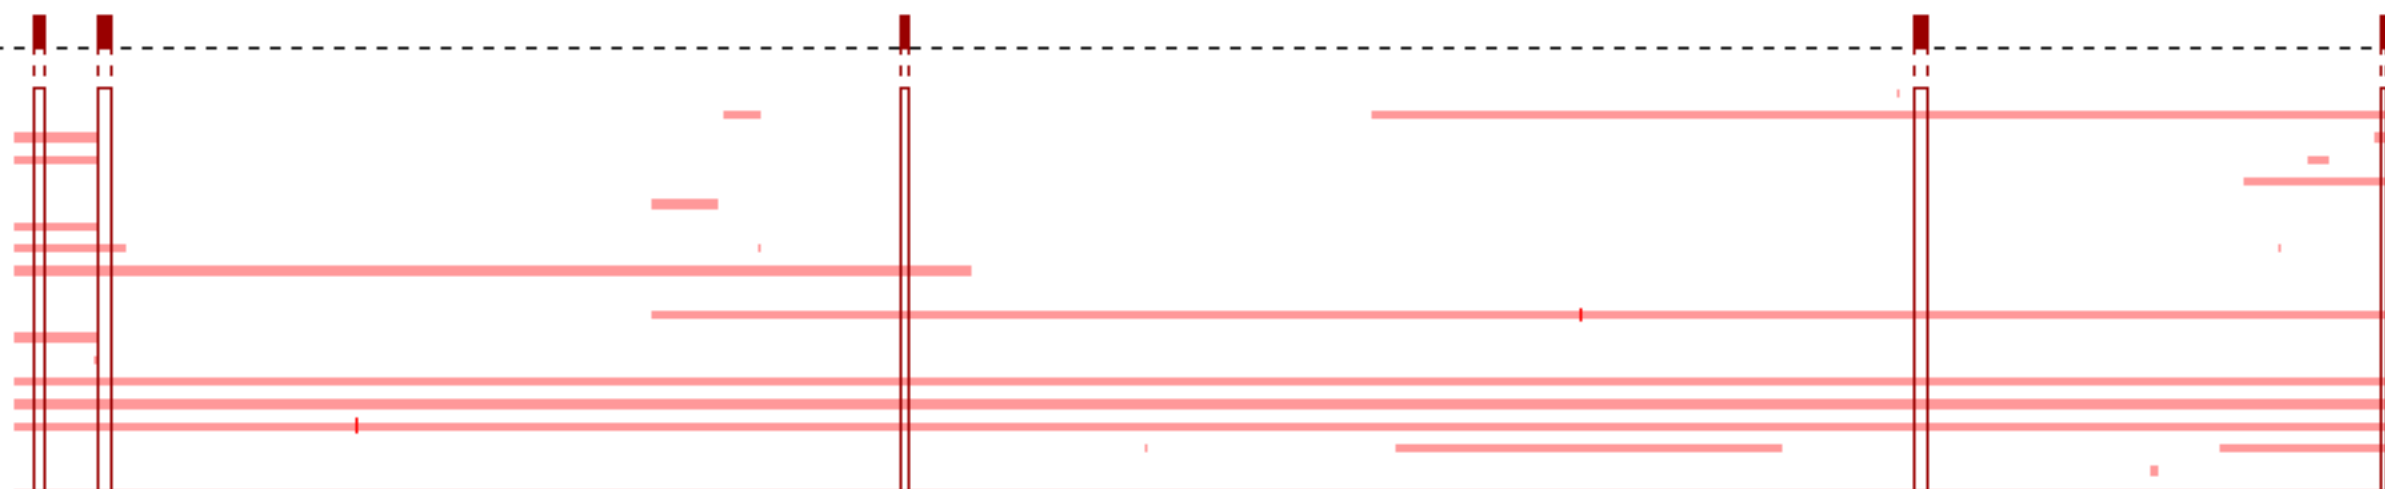

Redon et al., 2006

Gain

Loss

Multi-allelic or Complex

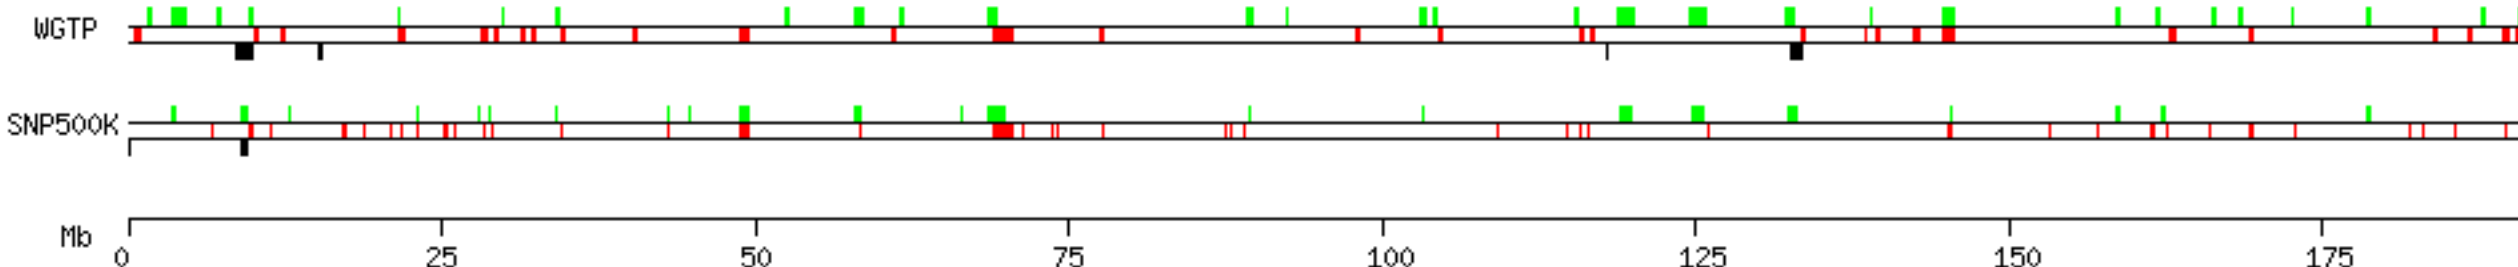

CHROMOSOME : chr5  
Length : 180857866 bp

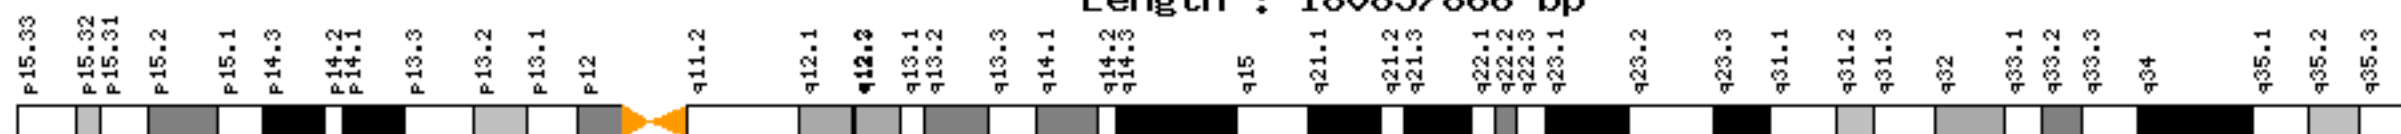

**G**  
MSA

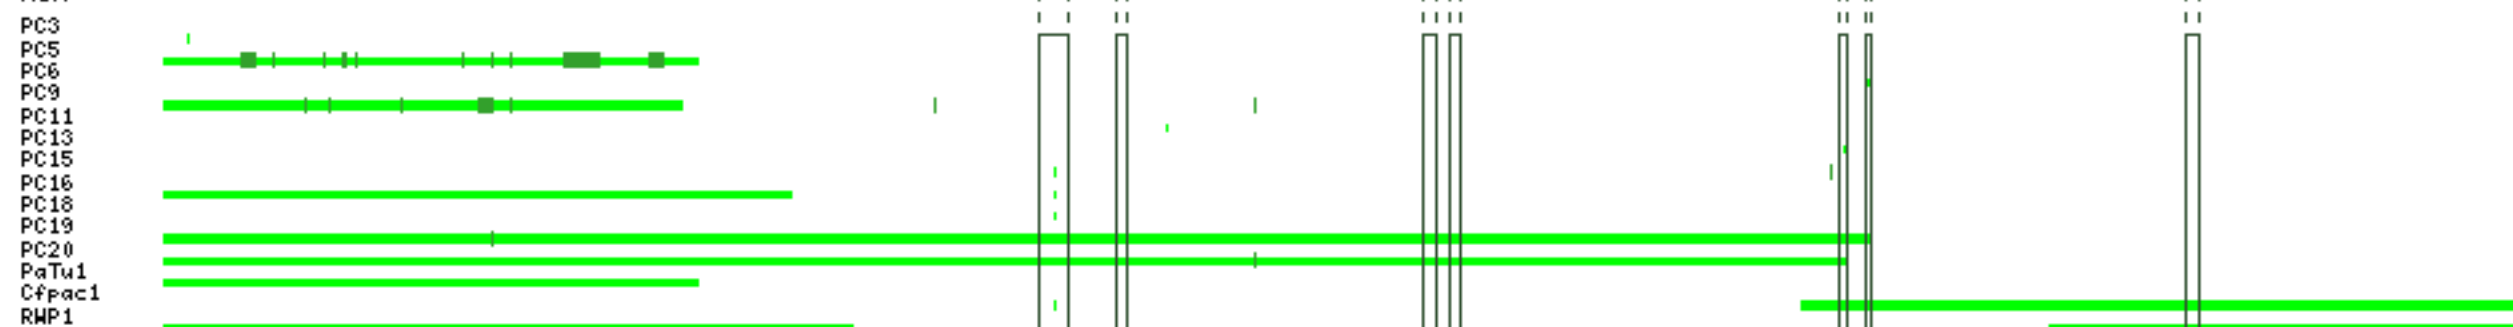

**L**  
MSA

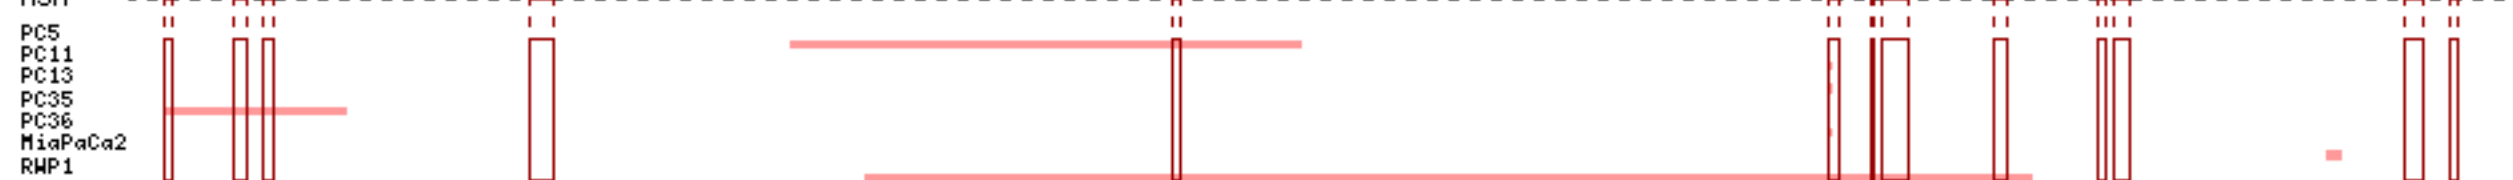

Redon et al., 2006

Gain

Loss

Multi-allelic or Complex

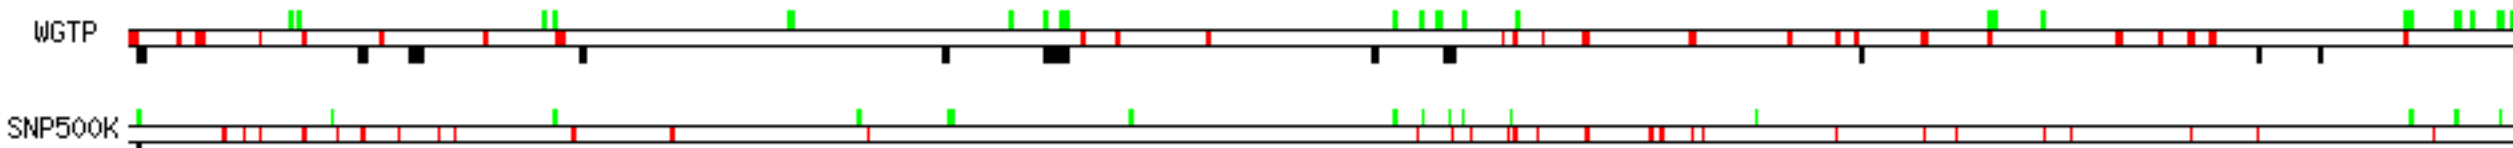

Mb 0 25 50 75 100 125 150 175

CHROMOSOME : chr6  
Length : 170975699 bp

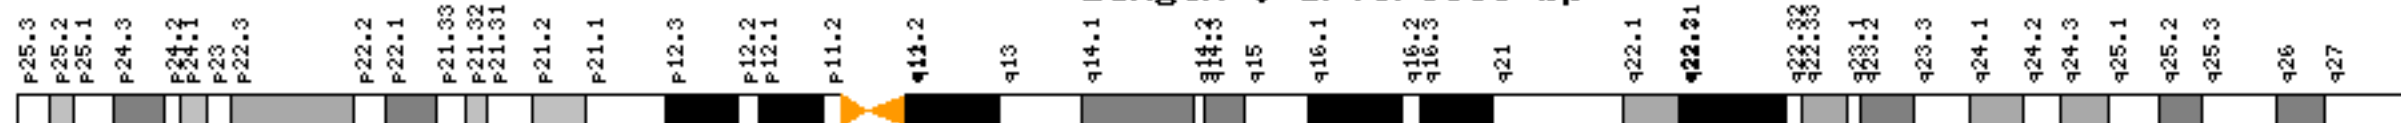

G  
MSA

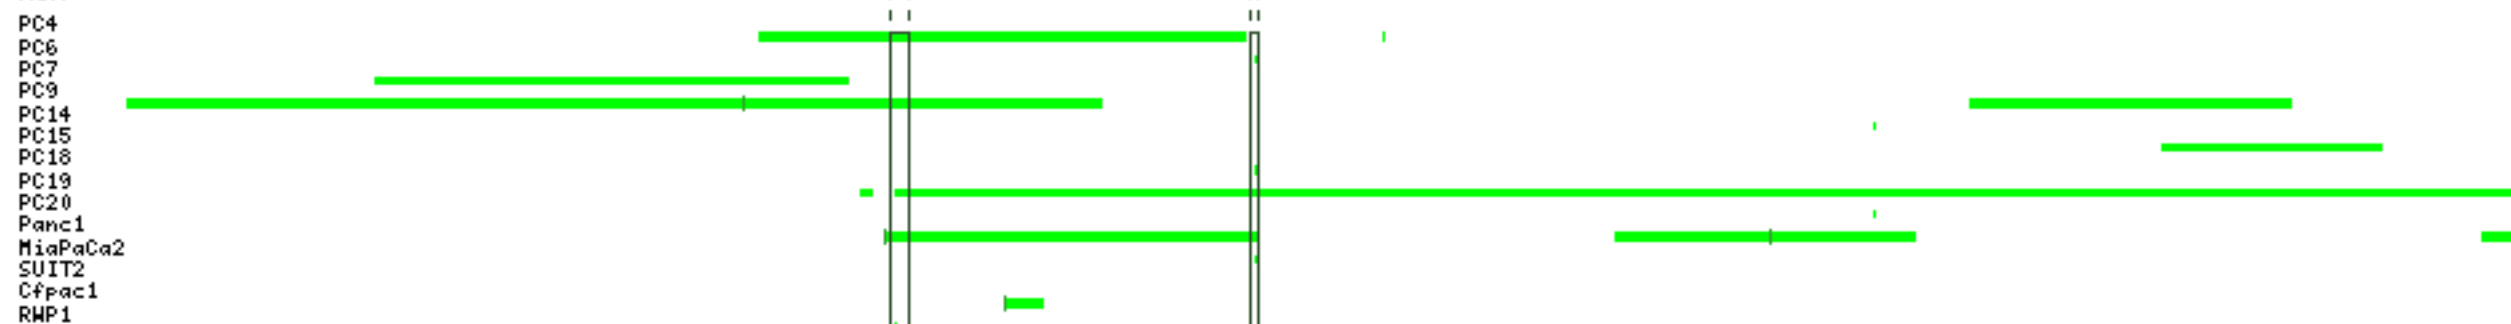

L  
MSA

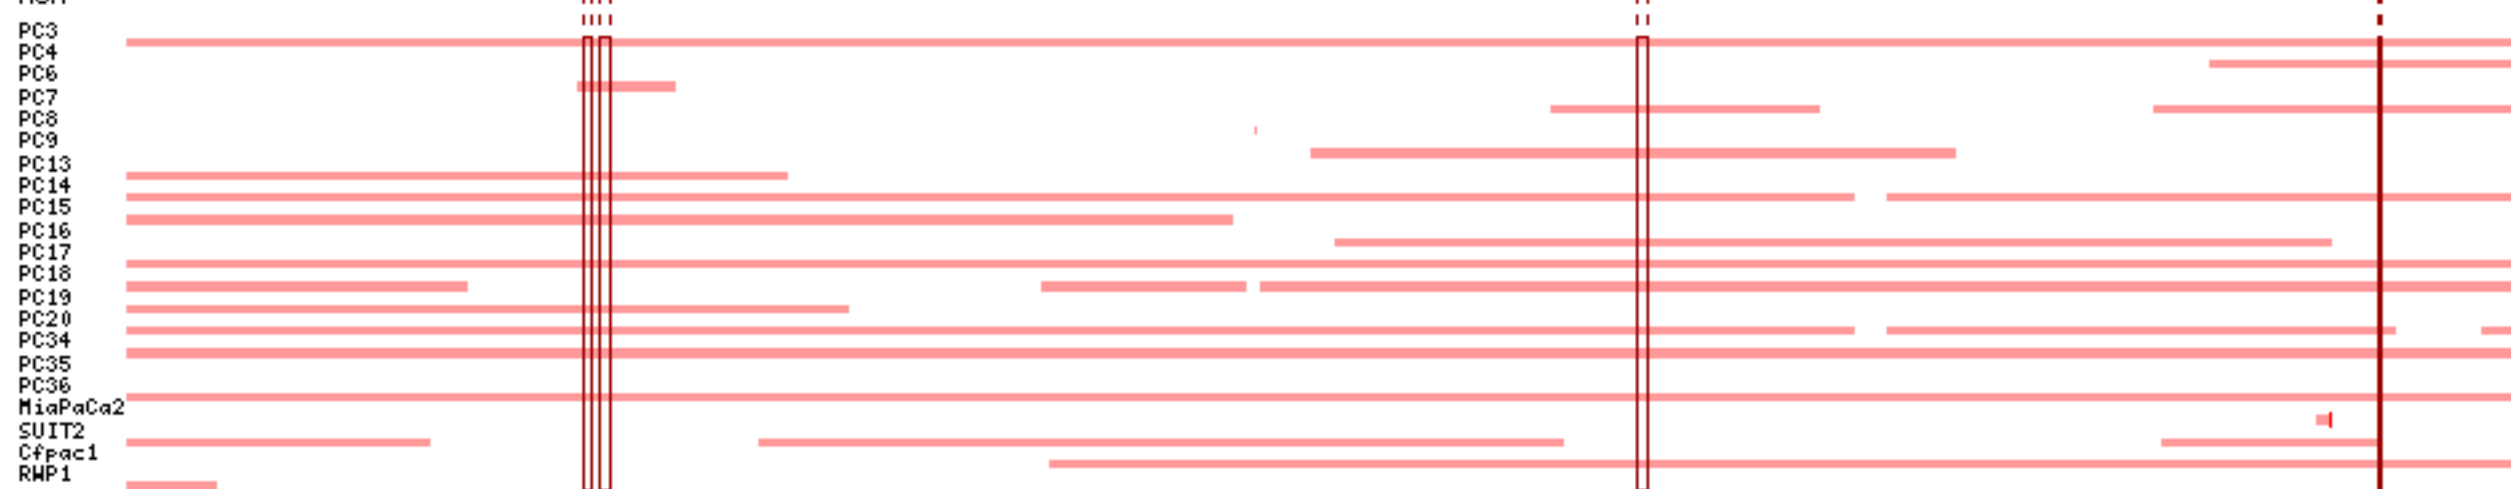

Redon et al., 2006

Gain

Loss

Multi-allelic or Complex

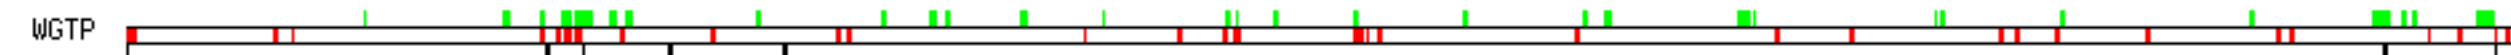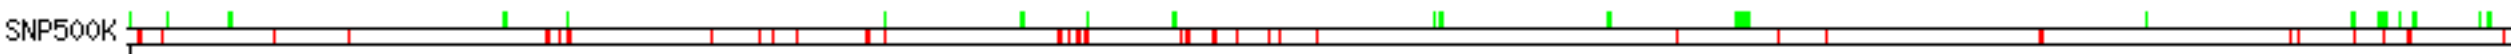

Mb

0 25 50 75 100 125 150

CHROMOSOME : chr7  
Length : 158628139 bp

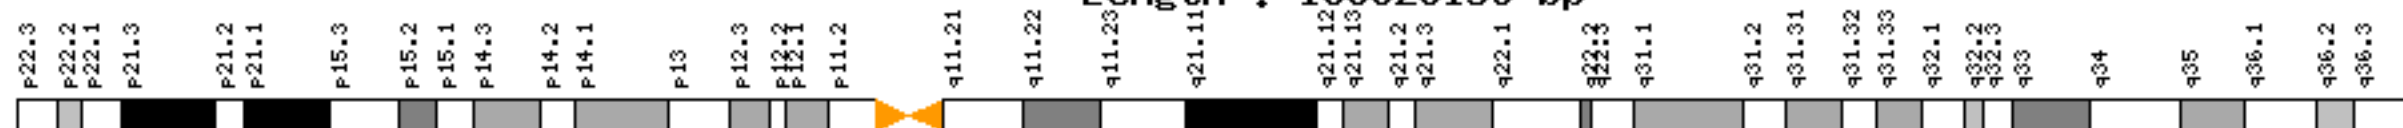

G  
MSA

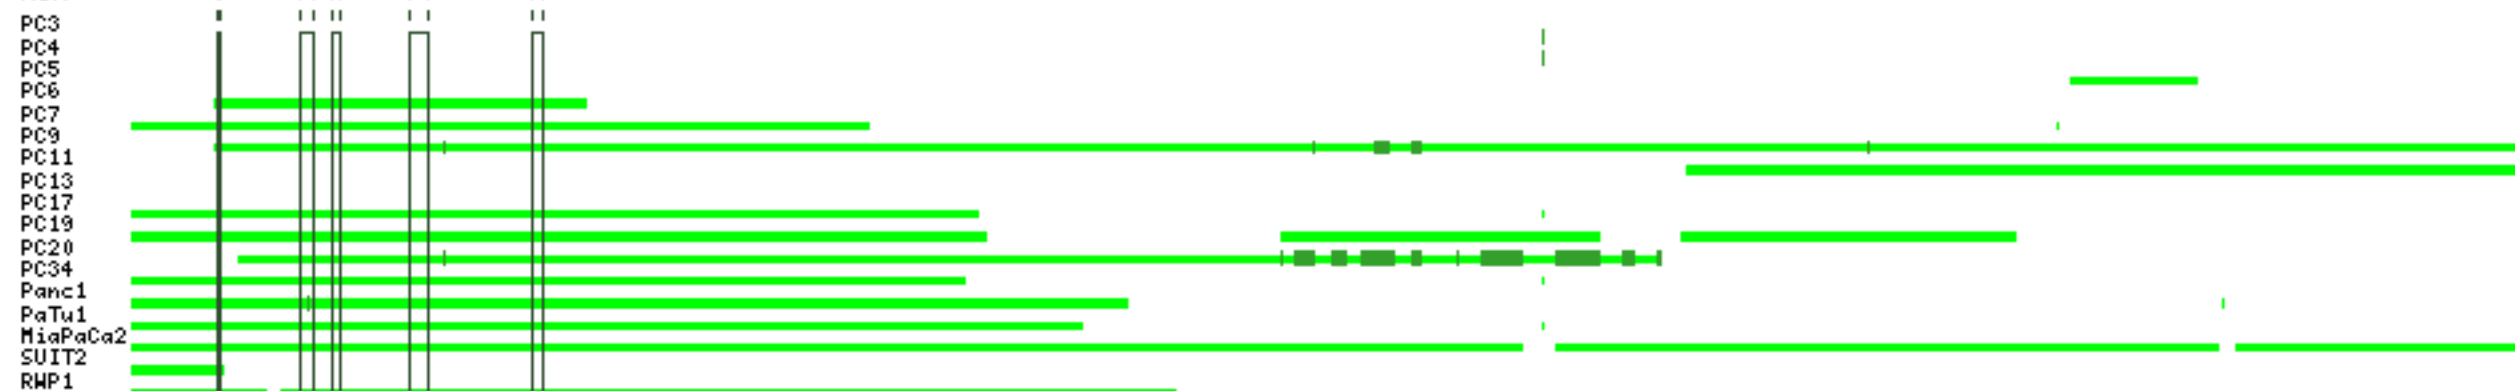

L  
MSA

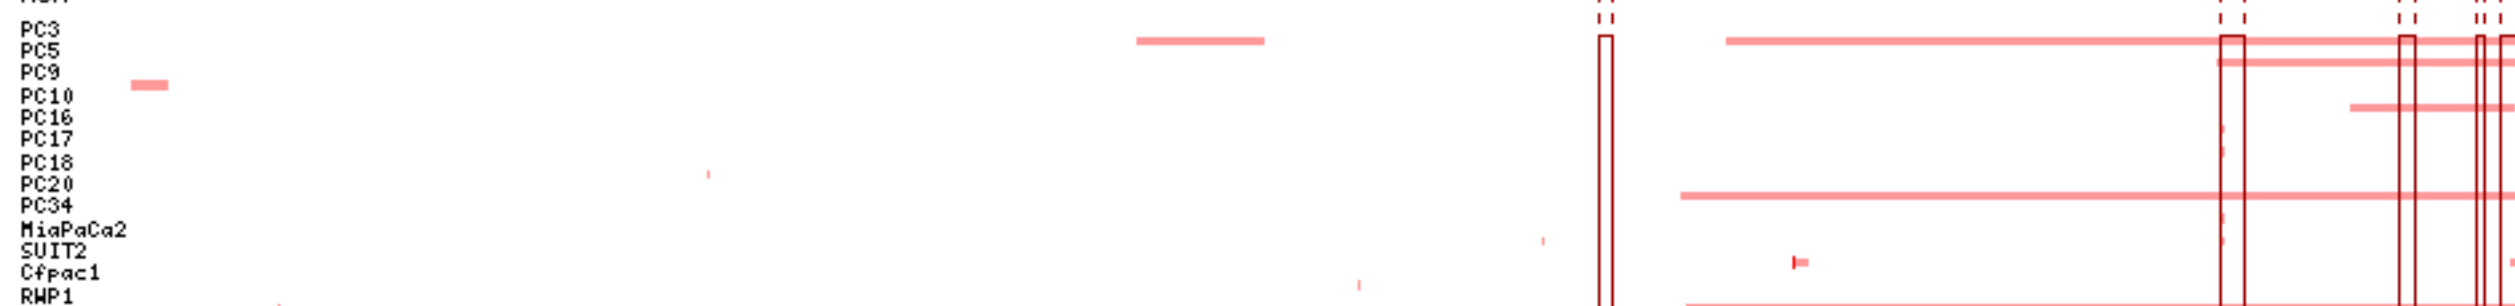

Redon et al., 2006

Gain Loss Multi-allelic or Complex

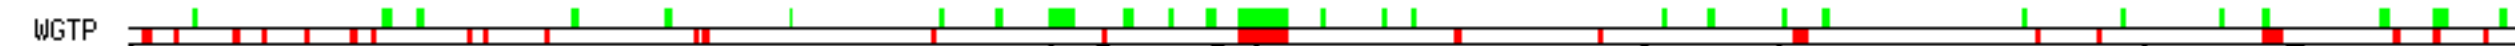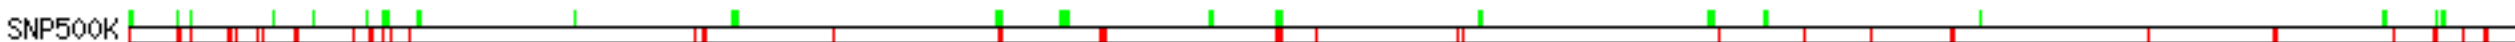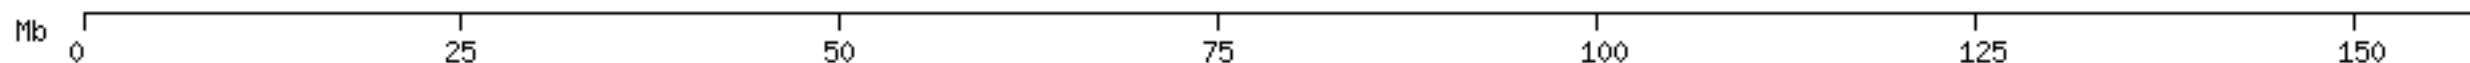

CHROMOSOME : chr8  
Length : 146274826 bp

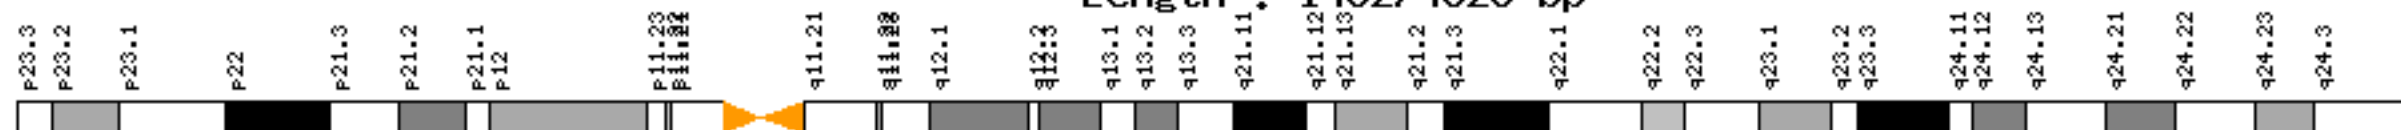

### G MSA

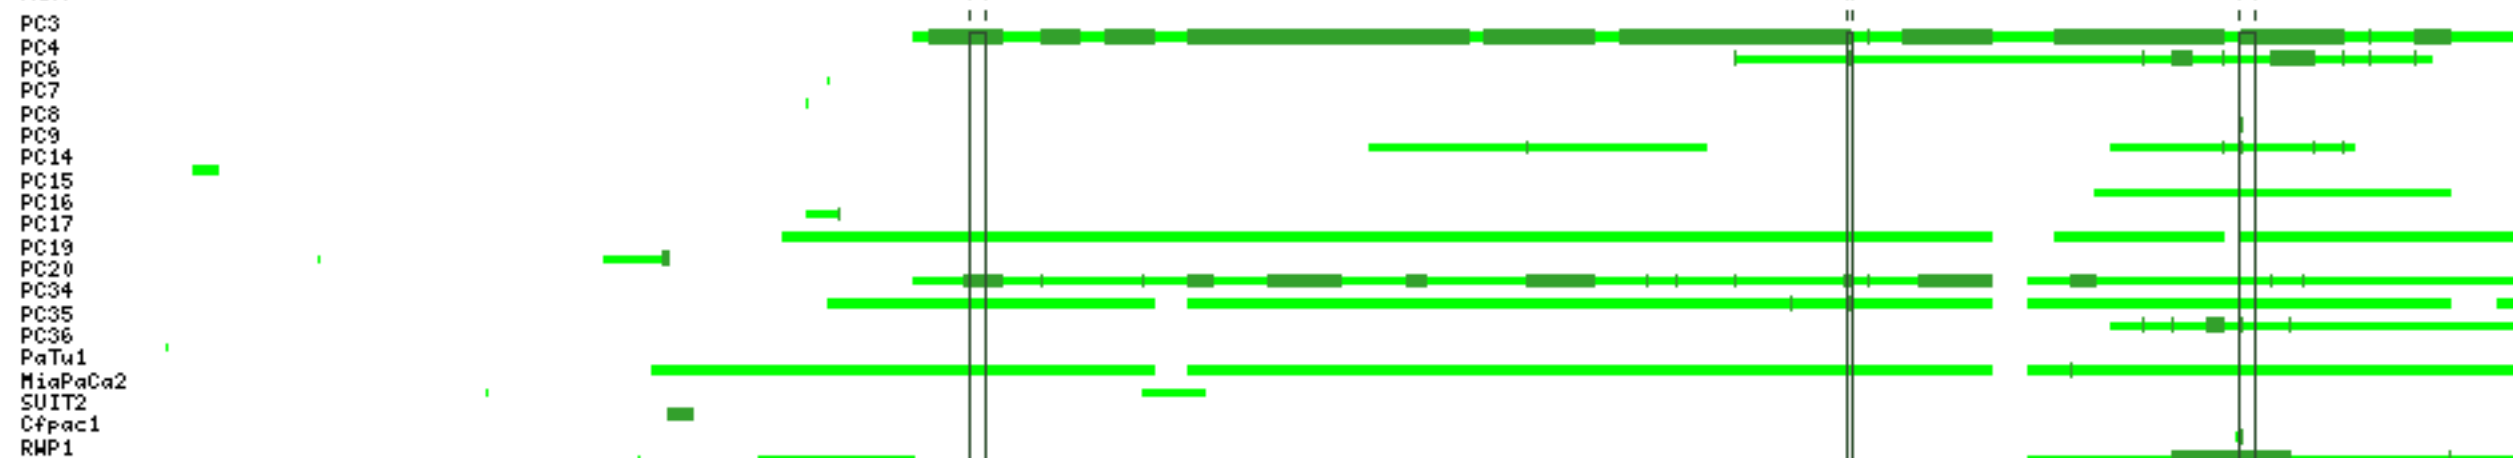

### L MSA

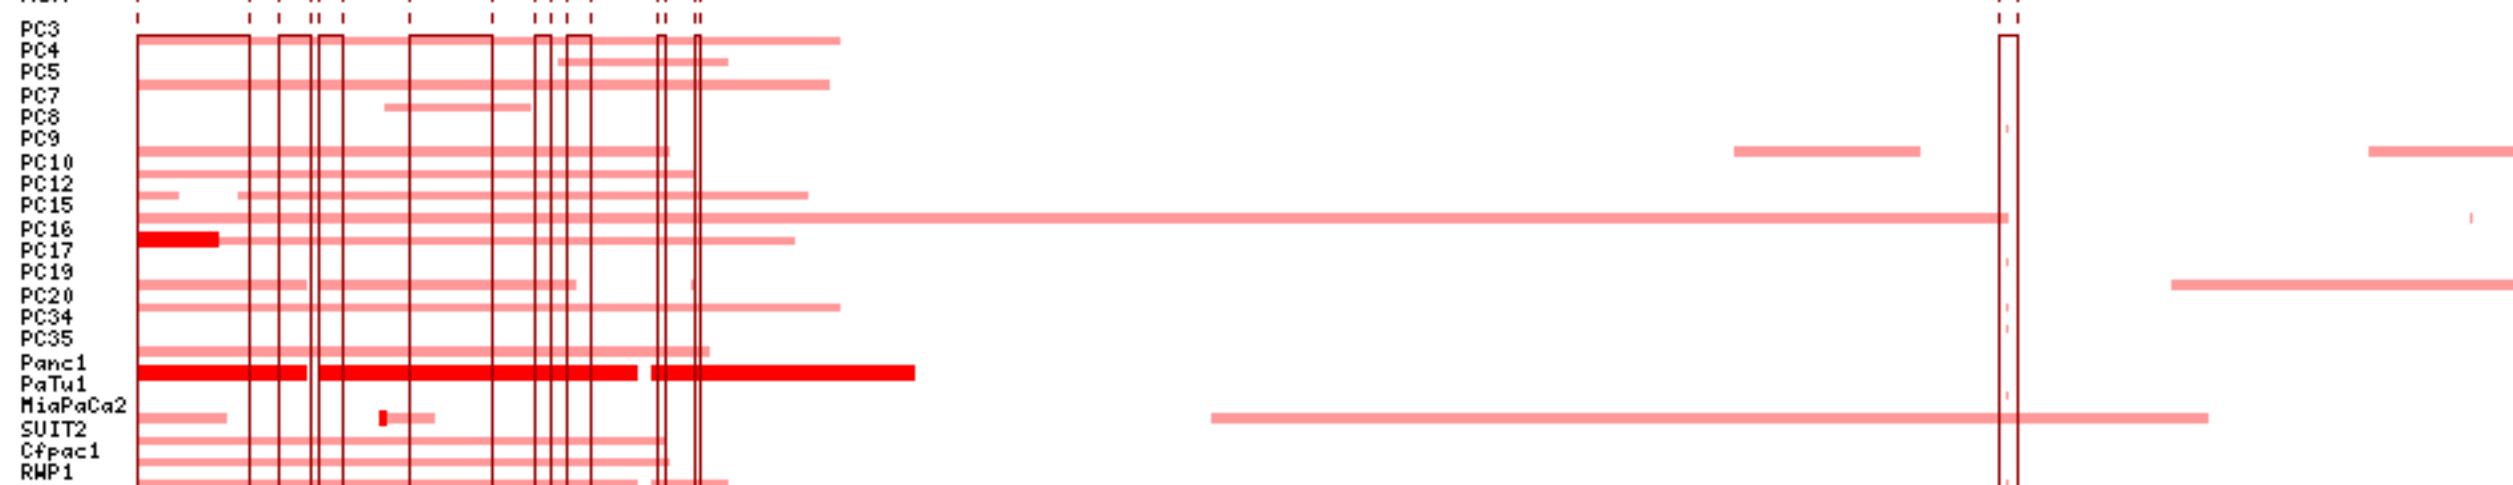

Redon et al., 2006

Gain Loss Multi-allelic or Complex

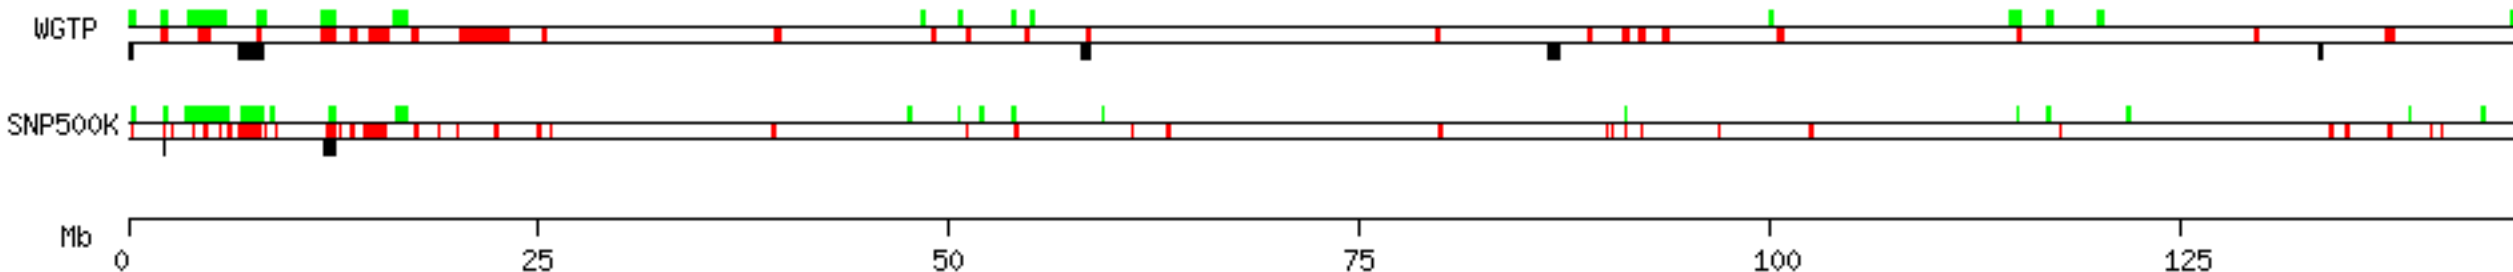



CHROMOSOME : chr9  
Length : 138429268 bp

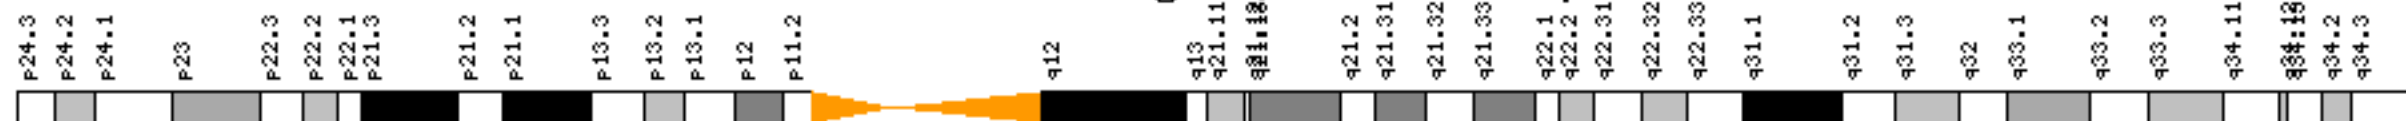

**G**  
MSA  
PC14  
PC35  
Panc1  
SUIT2

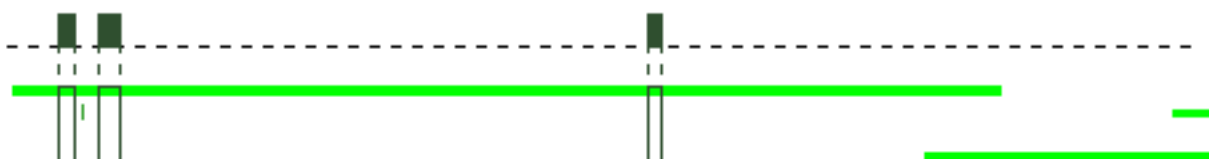

**L**  
MSA

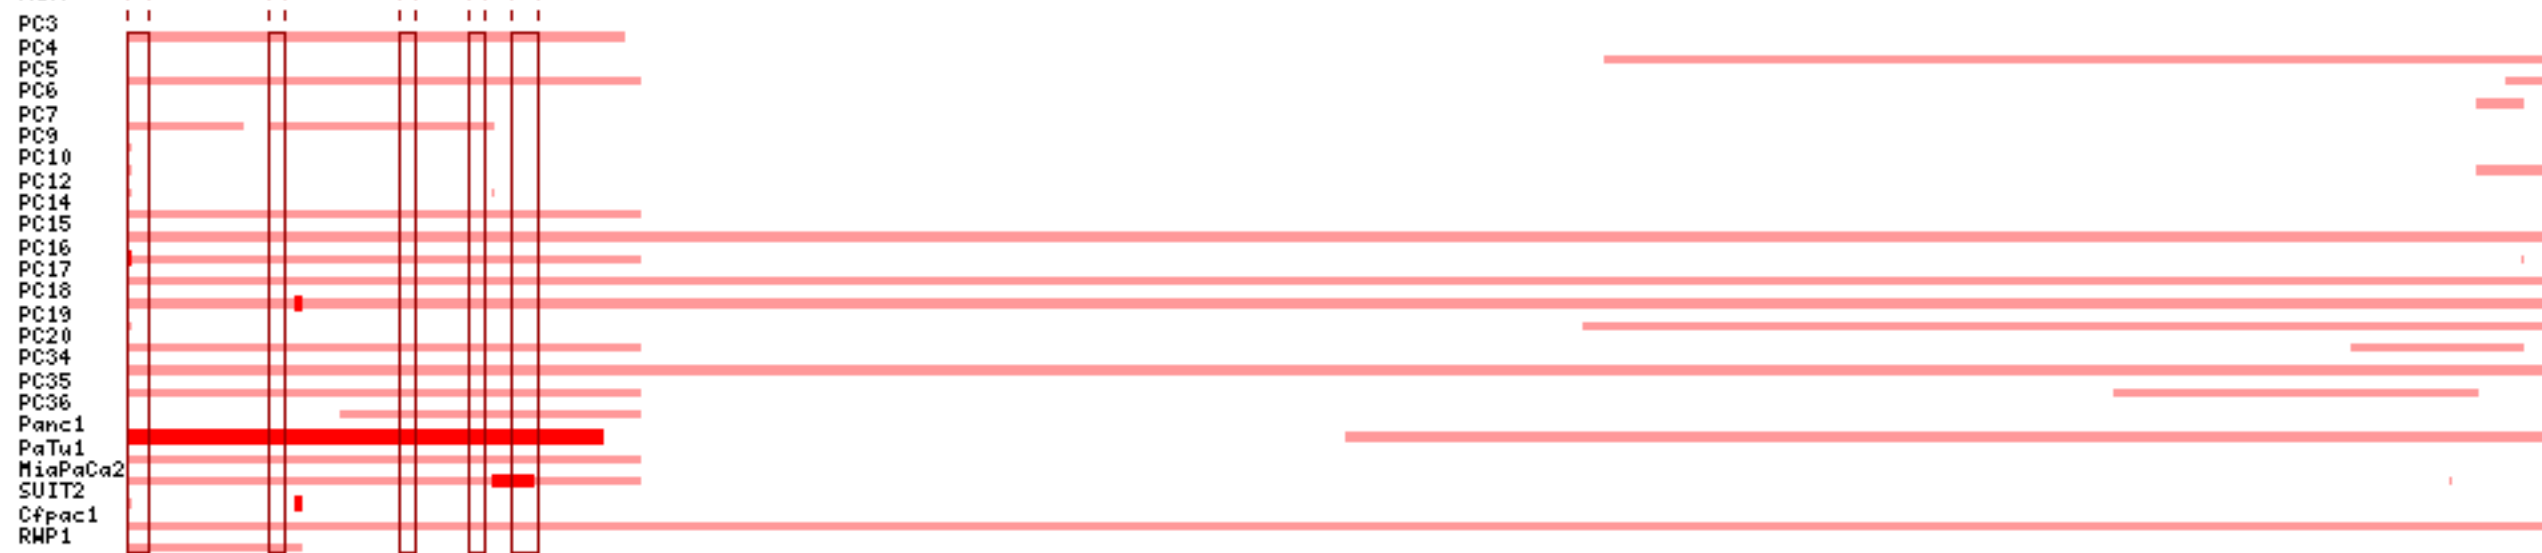

Redon et al., 2006

■ Gain ■ Loss ■ Multi-allelic or Complex

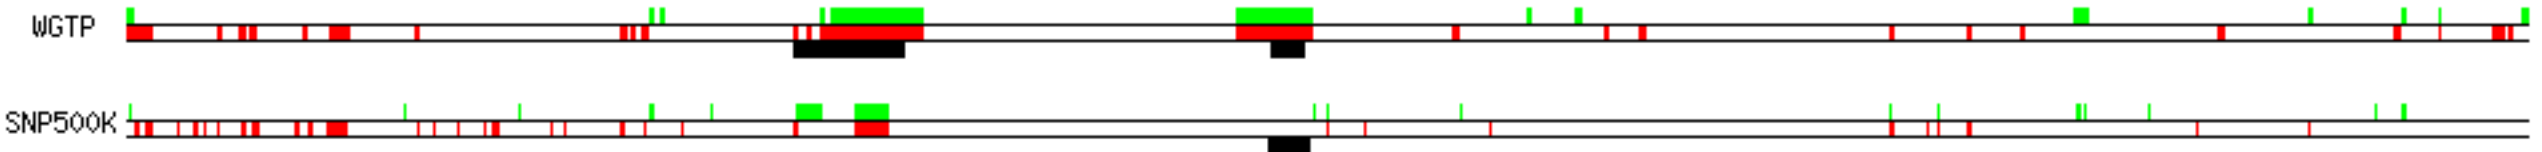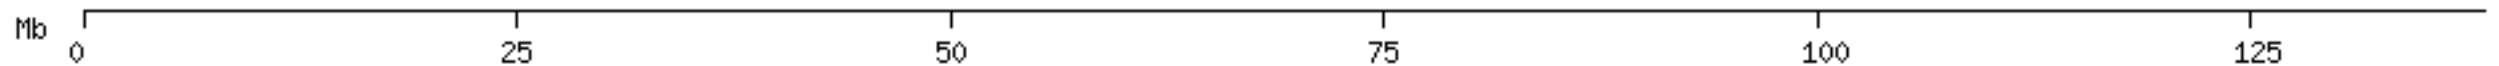

CHROMOSOME : chr10  
Length : 135413628 bp

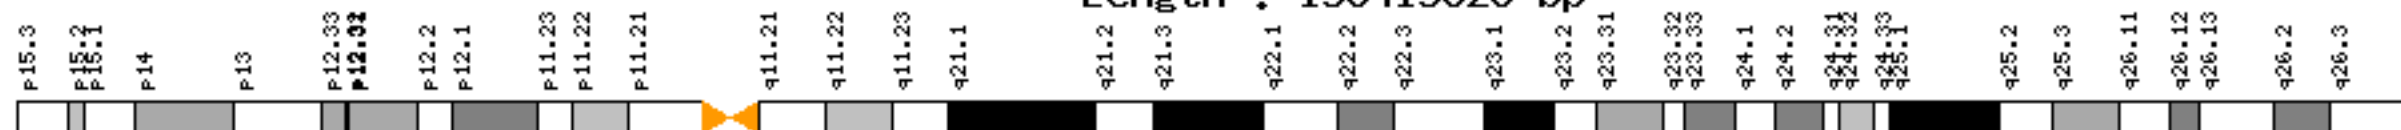

G  
MSA

PC5  
PC9  
PC19  
Panc1  
SUIT2  
RWP1

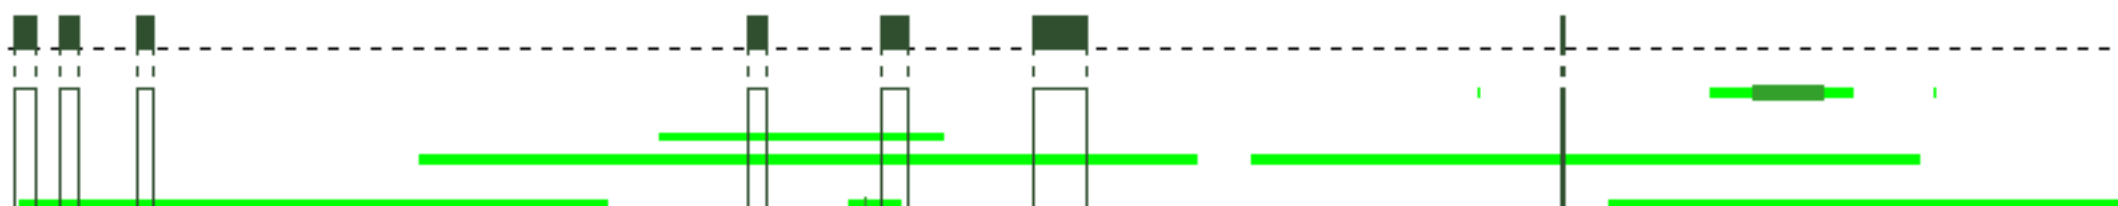

L  
MSA

PC3  
PC5  
PC7  
PC8  
PC9  
PC10  
PC11  
PC14  
PC19  
PC20  
PC35  
Panc1  
PaTu1  
CfPac1  
RWP1

Redon et al., 2006

Gain

Loss

Multi-allelic or Complex

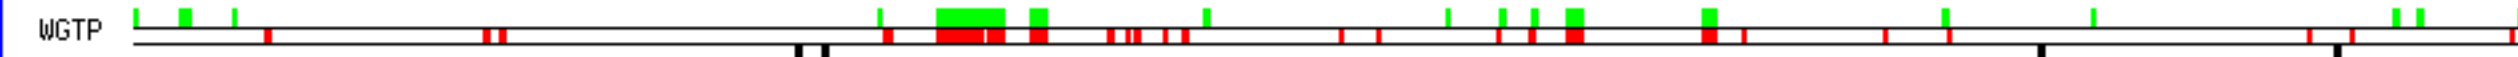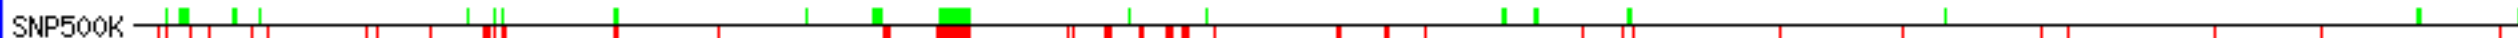

Mb

0

25

50

75

100

125

CHROMOSOME : chr11  
Length : 134452384 bp

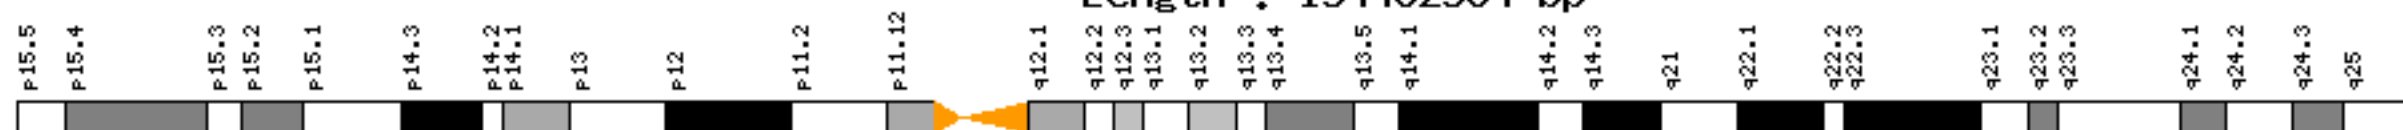

**G**  
MSA

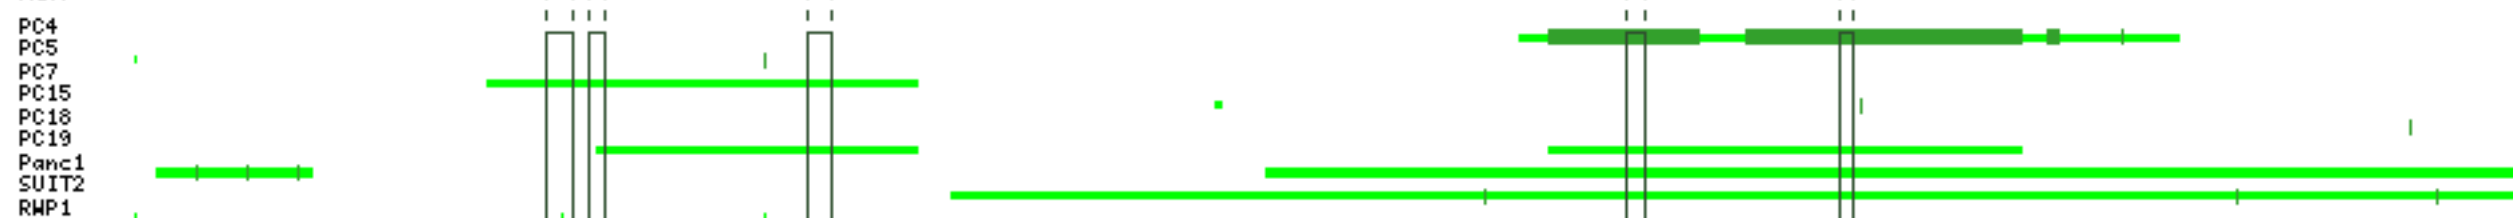

**L**  
MSA

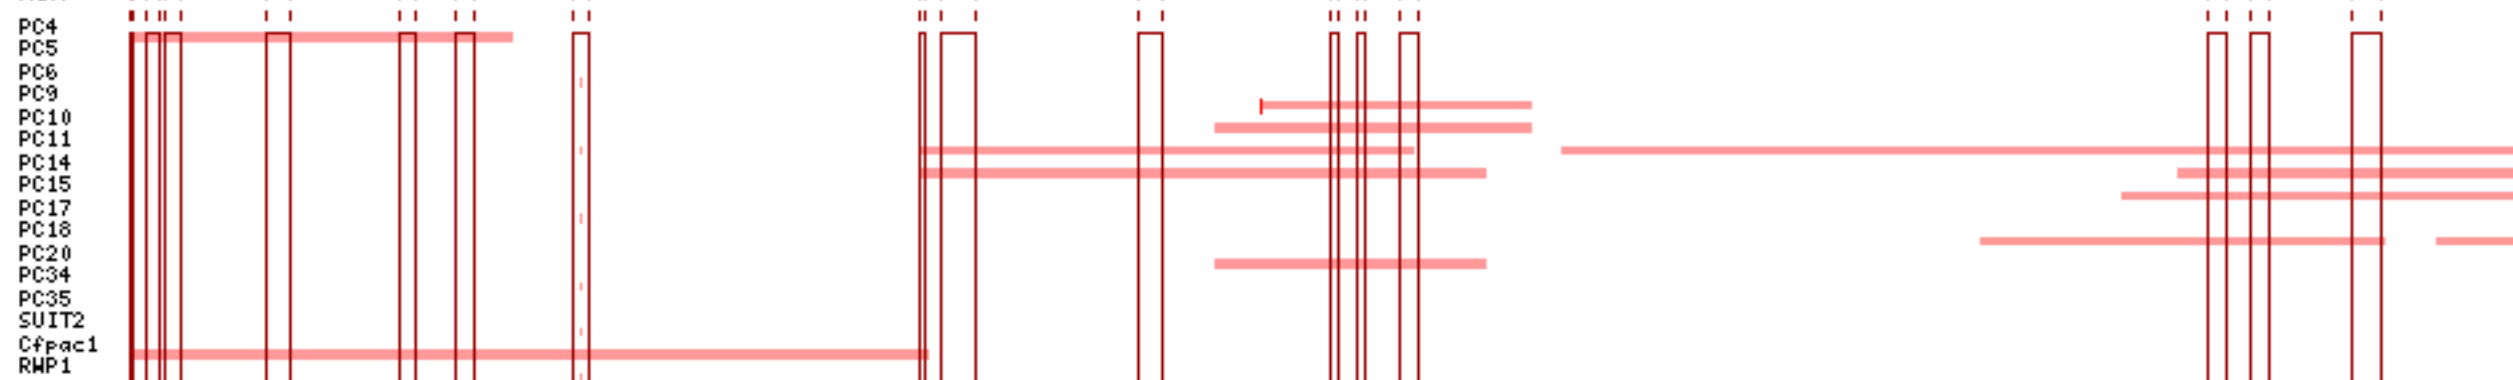

Redon et al., 2006

■ Gain ■ Loss ■ Multi-allelic or Complex

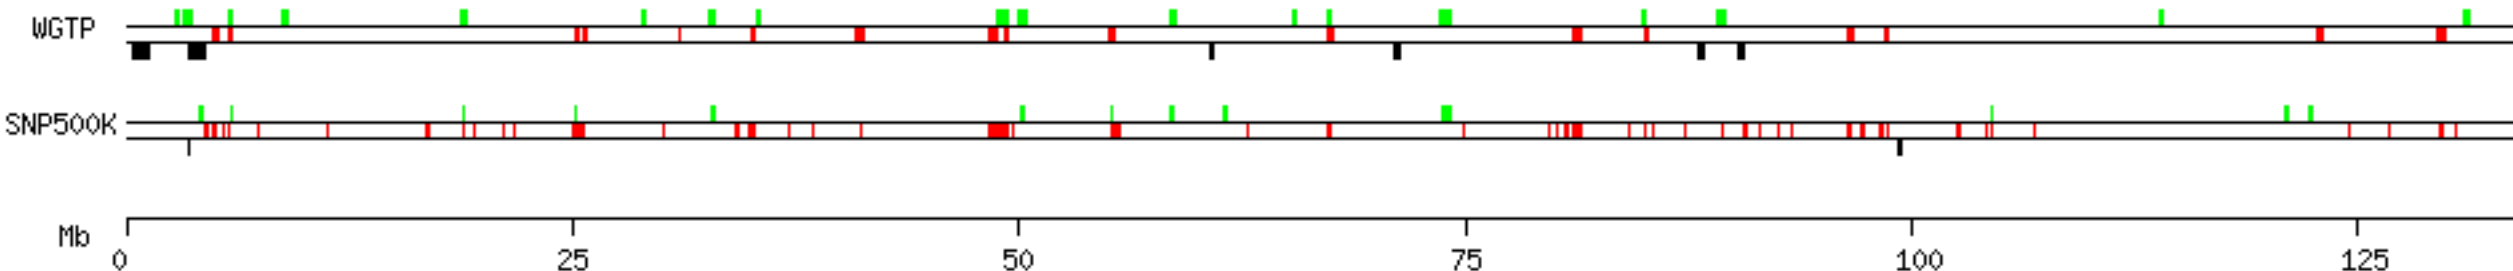

Mb

0

25

50

75

100

125

CHROMOSOME : chr12  
Length : 132449811 bp

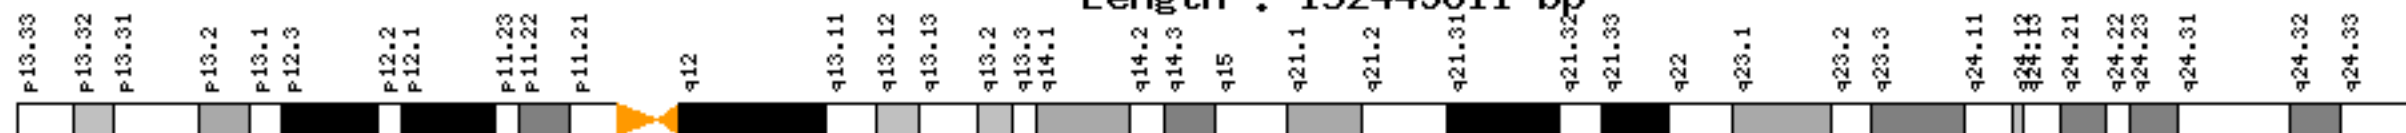

G

MSA

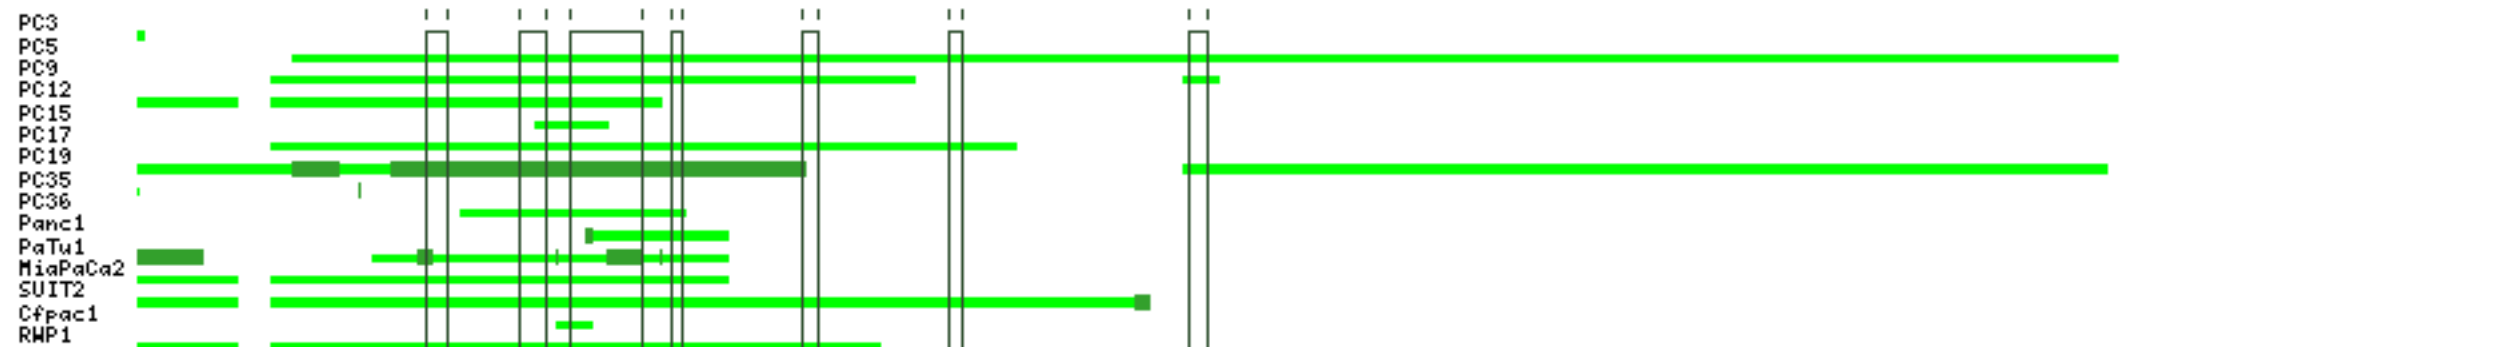

L

MSA

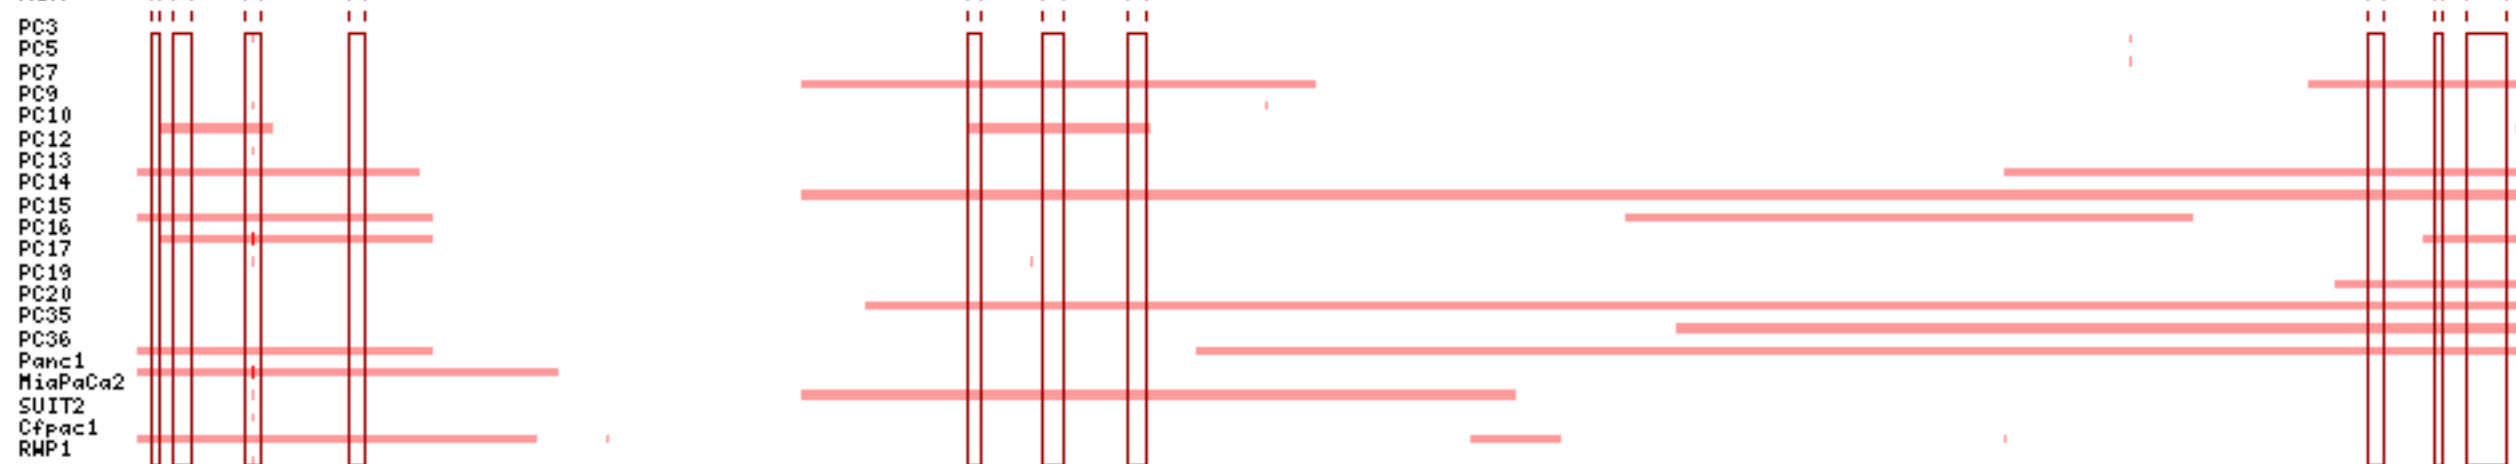

Redon et al., 2006

Gain

Loss

Multi-allelic or Complex

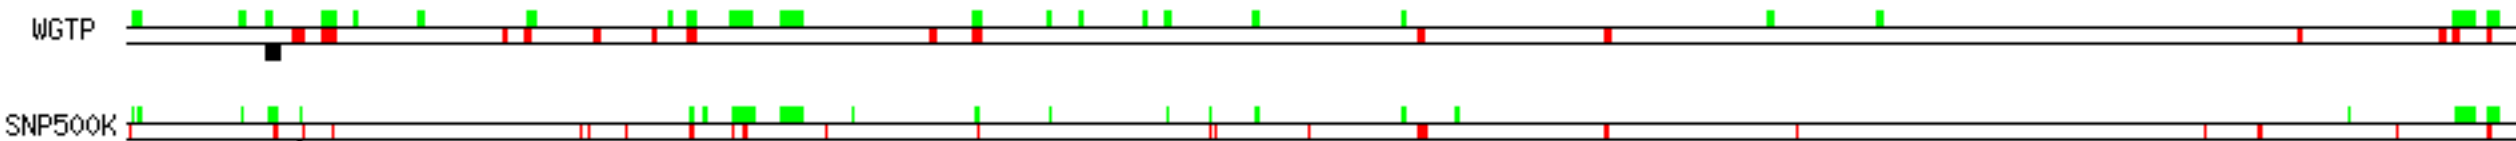

Mb

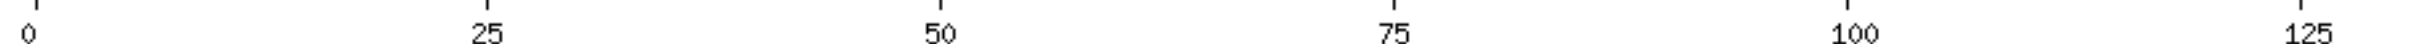

CHROMOSOME : chr13  
Length : 114142980 bp

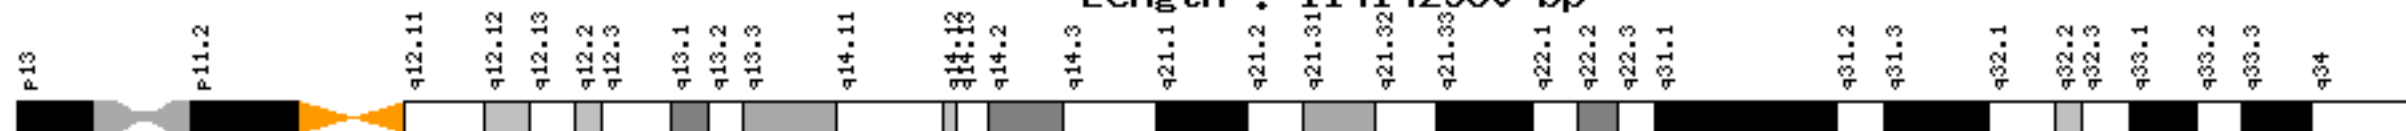

**G**  
MSA

PC5  
PC9  
PC20  
PaTu1

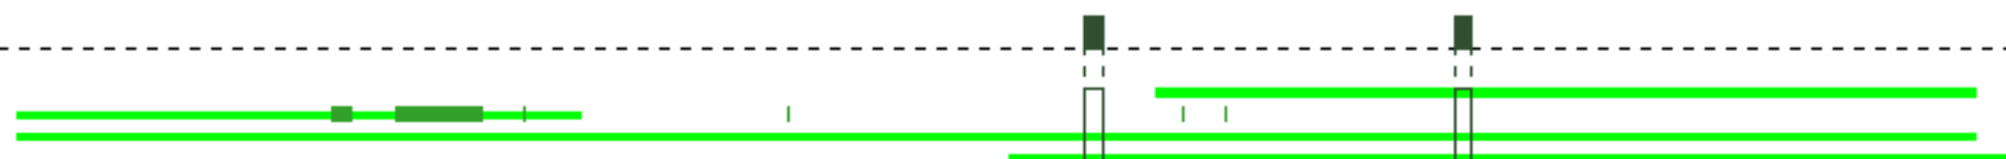

**L**  
MSA

PC3  
PC7  
PC9  
PC14  
PC15  
PC16  
PC18  
Panc1  
MiaPaCa2  
SUIT2  
CfPac1  
RWP1

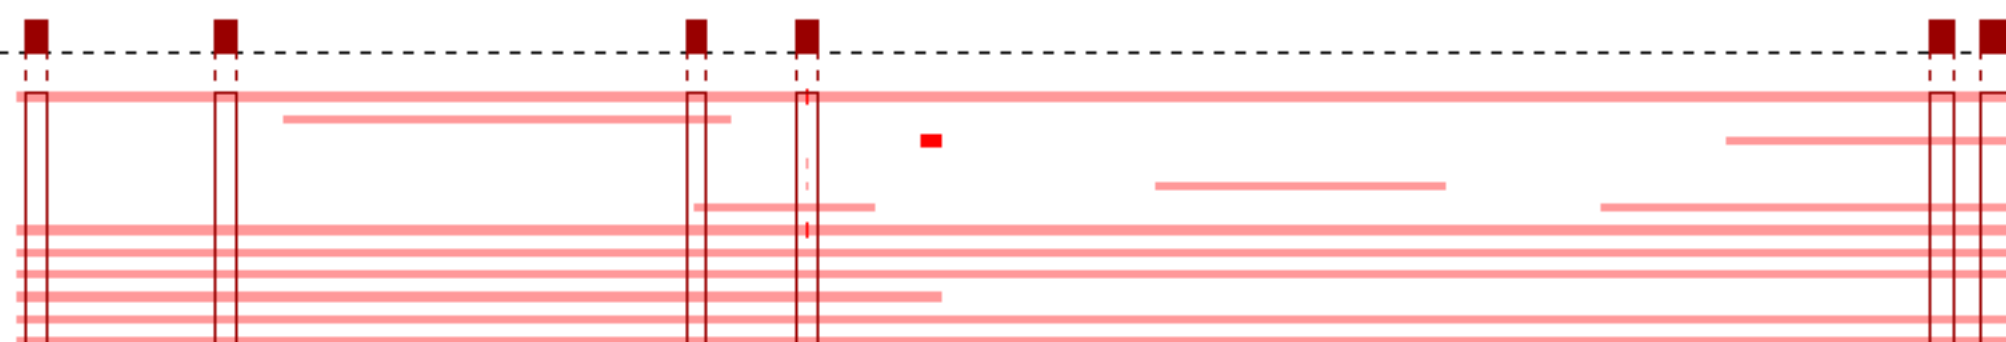

Redon et al., 2006

■ Gain

■ Loss

■ Multi-allelic or Complex

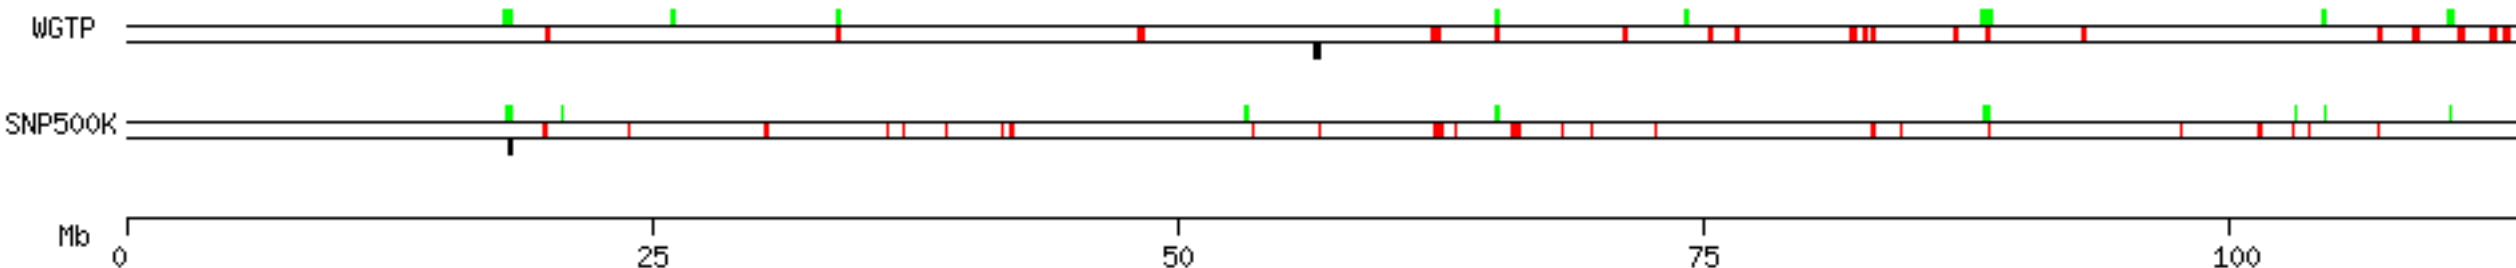

CHROMOSOME : chr14  
Length : 106368585 bp

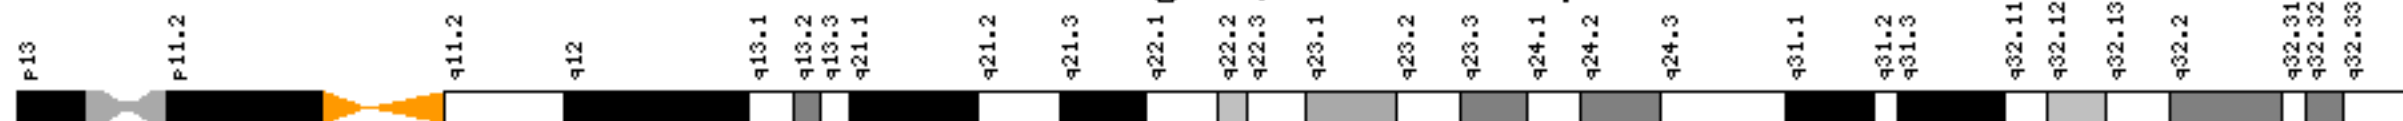

**G**

MSA

PC9  
PC12  
PC20  
SUIT2  
Cfpacl  
RWP1

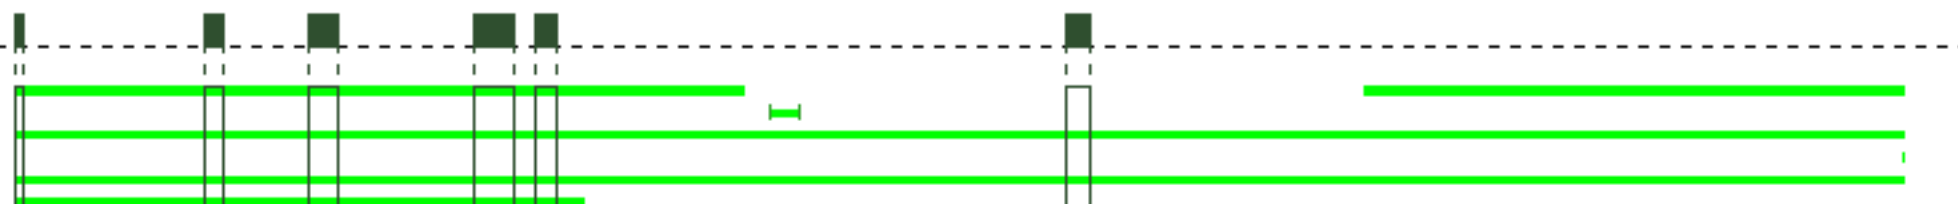

**L**

MSA

PC3  
PC4  
PC7  
PC10  
PC14  
PC16  
PC19  
Panc1

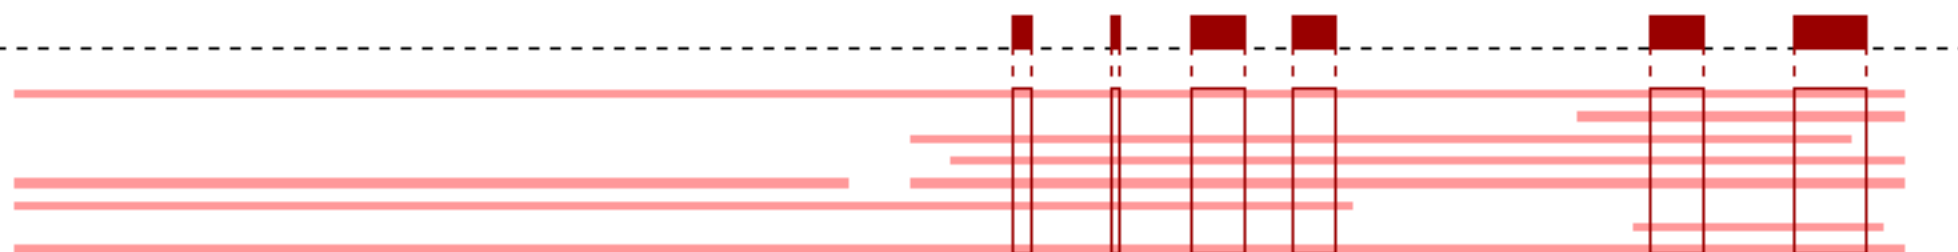

Redon et al., 2006

Gain

Loss

Multi-allelic or Complex

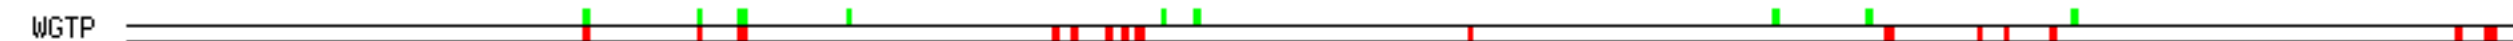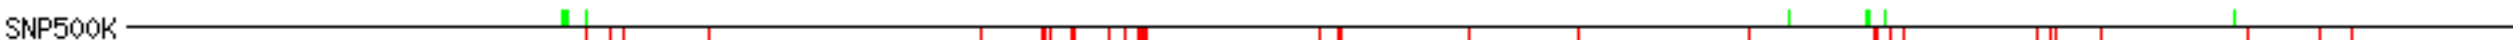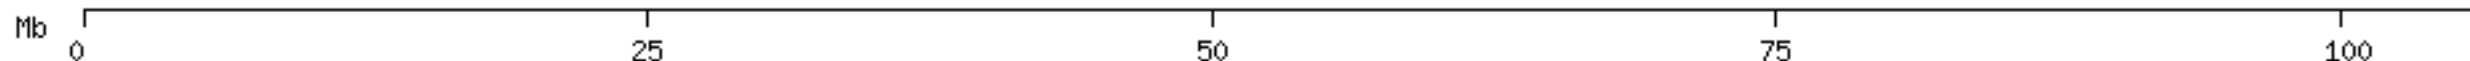

CHROMOSOME : chr15  
Length : 100338915 bp

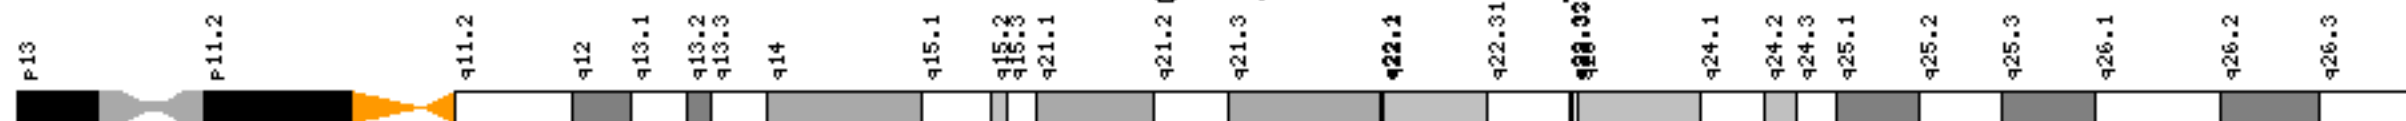

**G**

MSA

PC7  
PC9  
PC16  
Panc1  
MiaPaCa2  
RWP1

**L**

MSA

PC4  
PC5  
PC6  
PC8  
PC10  
PC11  
PC14  
PC15  
PC18  
PC20  
PC35  
MiaPaCa2  
SUIT2  
Cfpacl

Redon et al., 2006

Gain

Loss

Multi-allelic or Complex

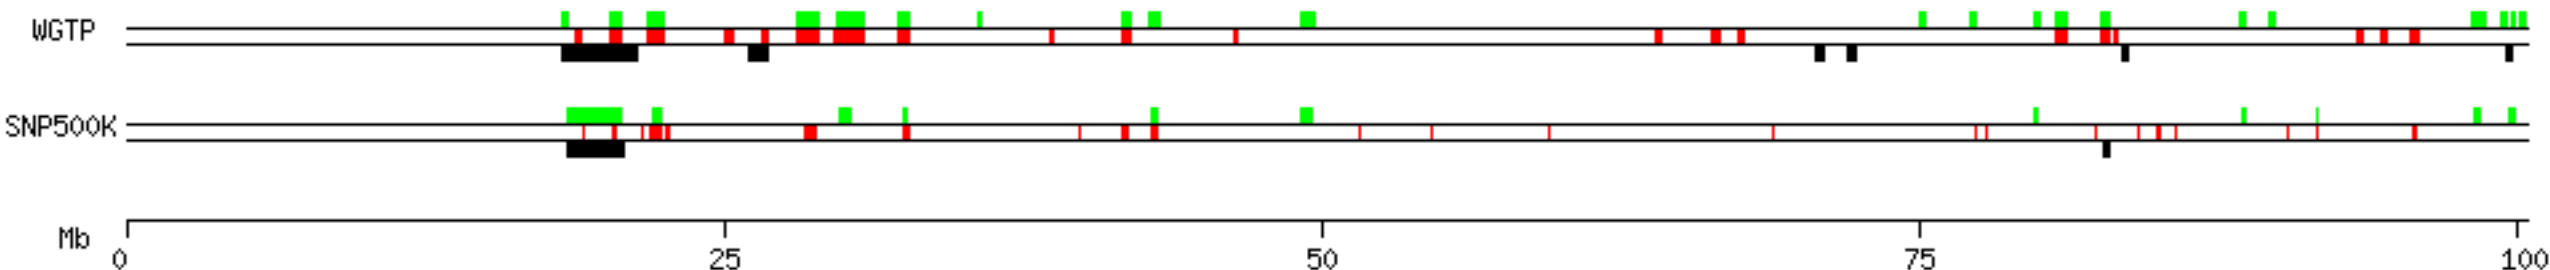

CHROMOSOME : chr16  
Length : 88827254 bp

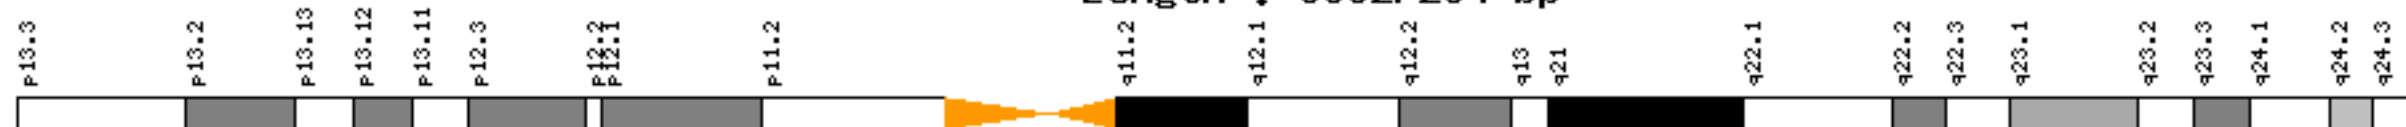

**G**  
MSA

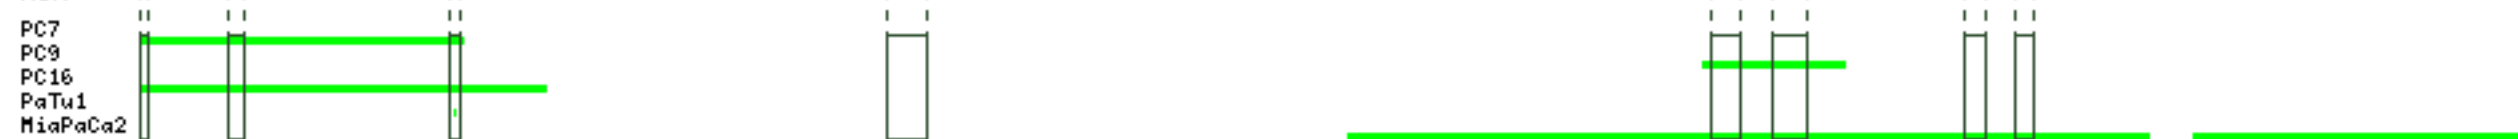

**L**  
MSA

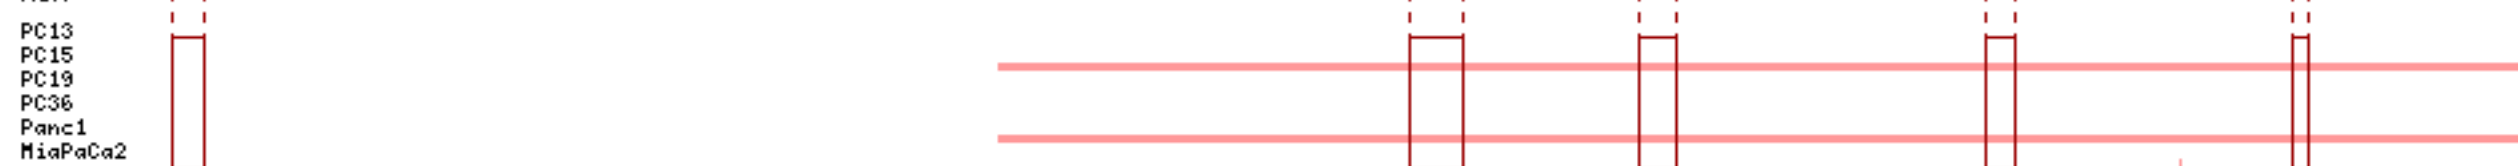

Redon et al., 2006

■ Gain      ■ Loss      ■ Multi-allelic or Complex

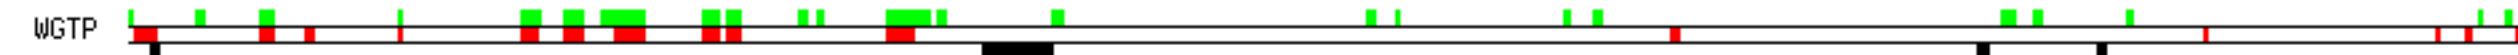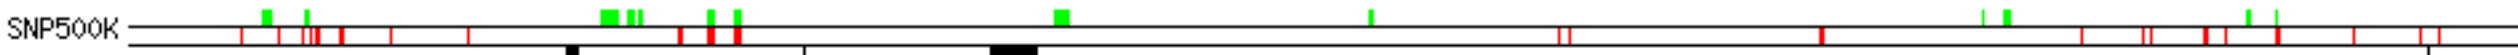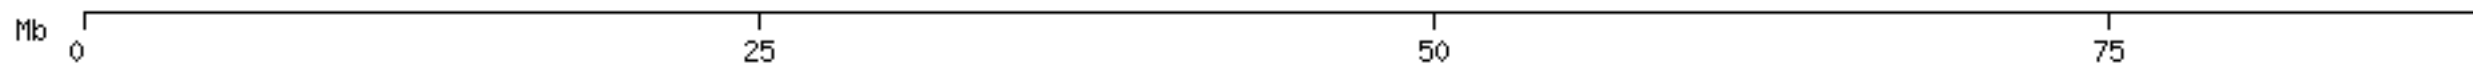



CHROMOSOME : chr17  
Length : 78774742 bp

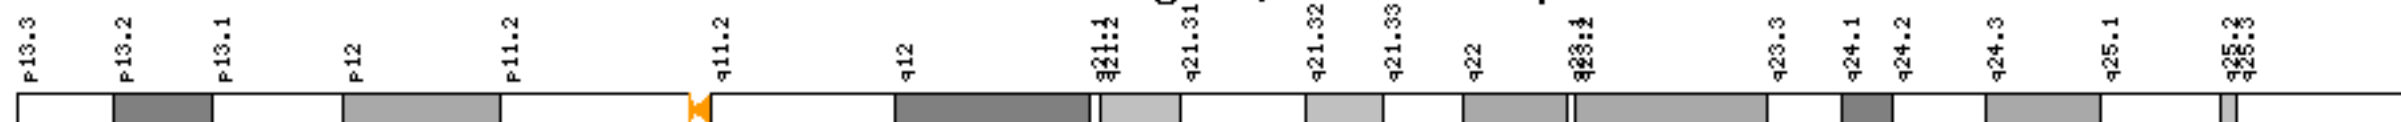

G

MSA

PC5  
PC7  
PC11  
PC15  
PC17  
PC18  
PC34  
Panc1  
PaTu1  
SUIT2  
CfPac1  
RWP1

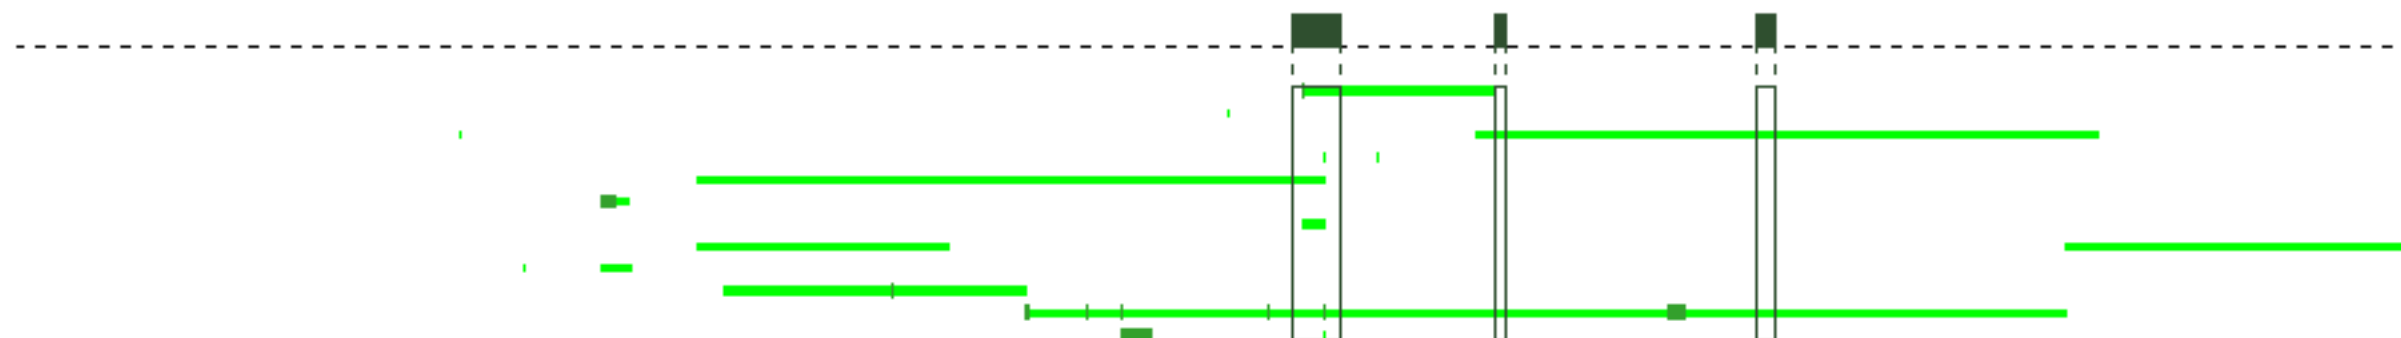

L

MSA

PC3  
PC4  
PC5  
PC7  
PC8  
PC9  
PC10  
PC11  
PC12  
PC14  
PC15  
PC17  
PC18  
PC19  
PC20  
PC34  
PC35  
Panc1  
MiaPaCa2  
SUIT2  
CfPac1  
RWP1

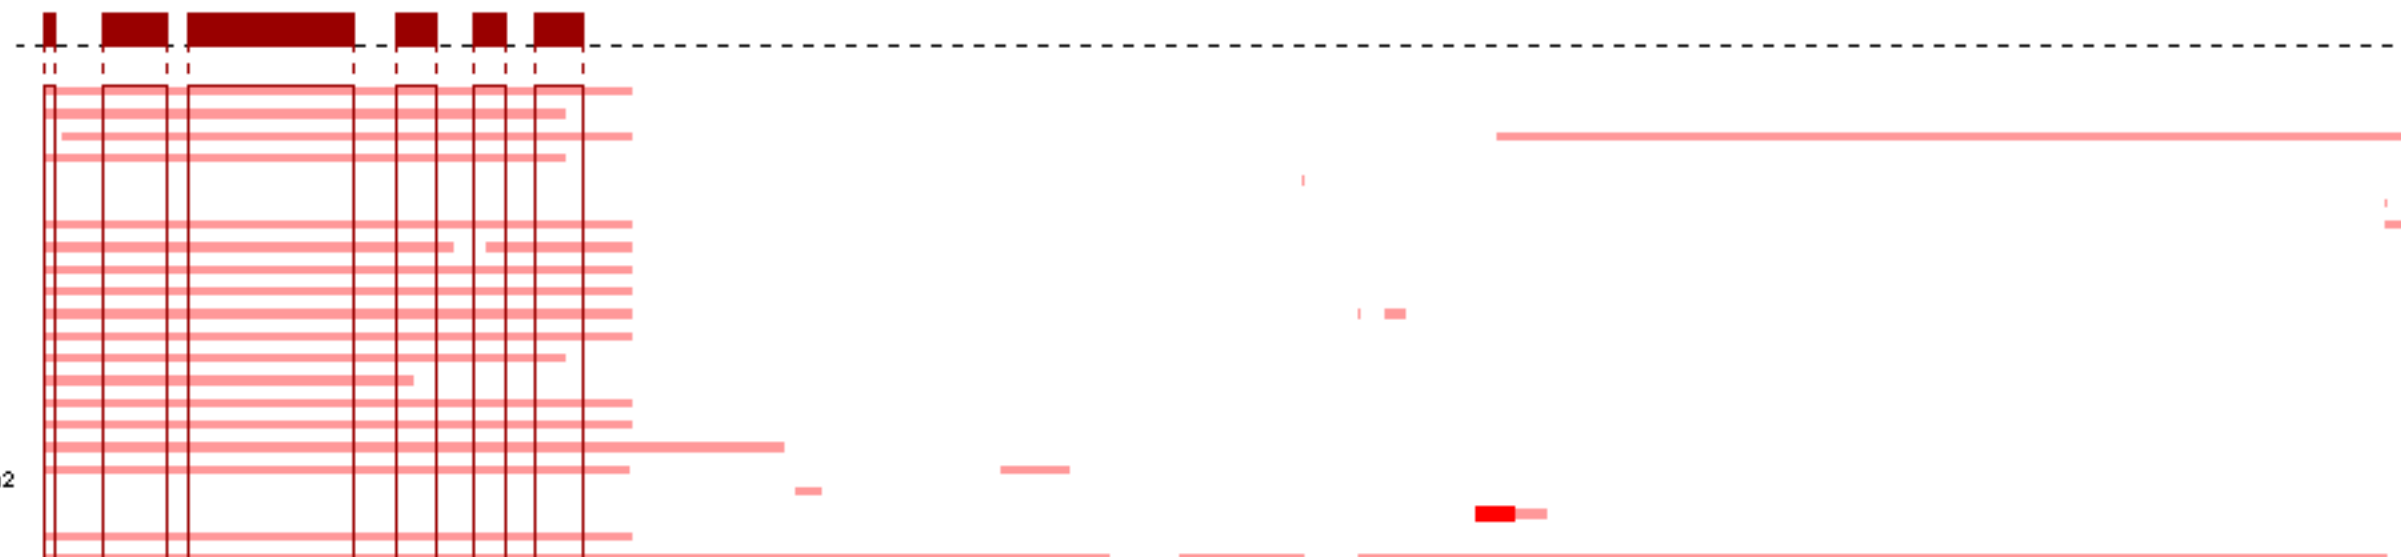

Redon et al., 2006

Gain

Loss

Multi-allelic or Complex

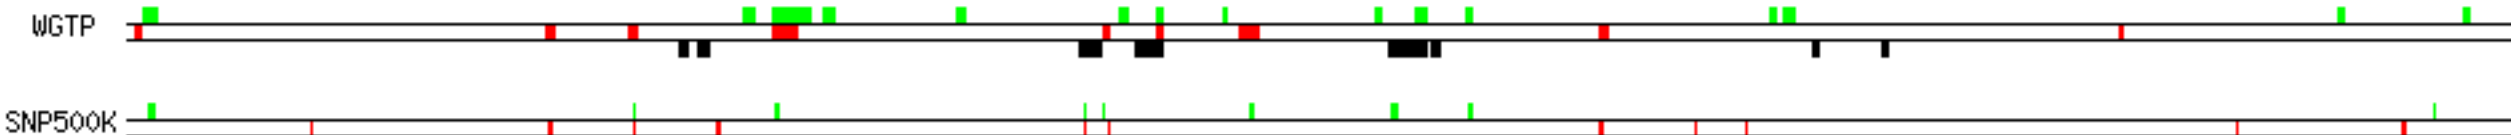

Mb

0

25

50

75

CHROMOSOME : chr18  
Length : 76117153 bp

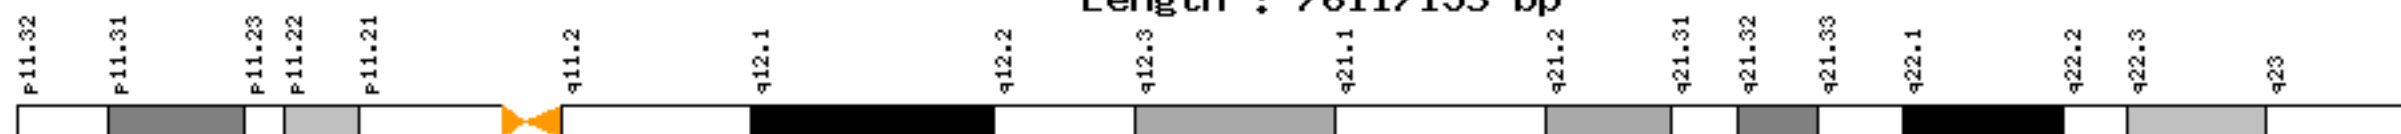

**G**  
MSA

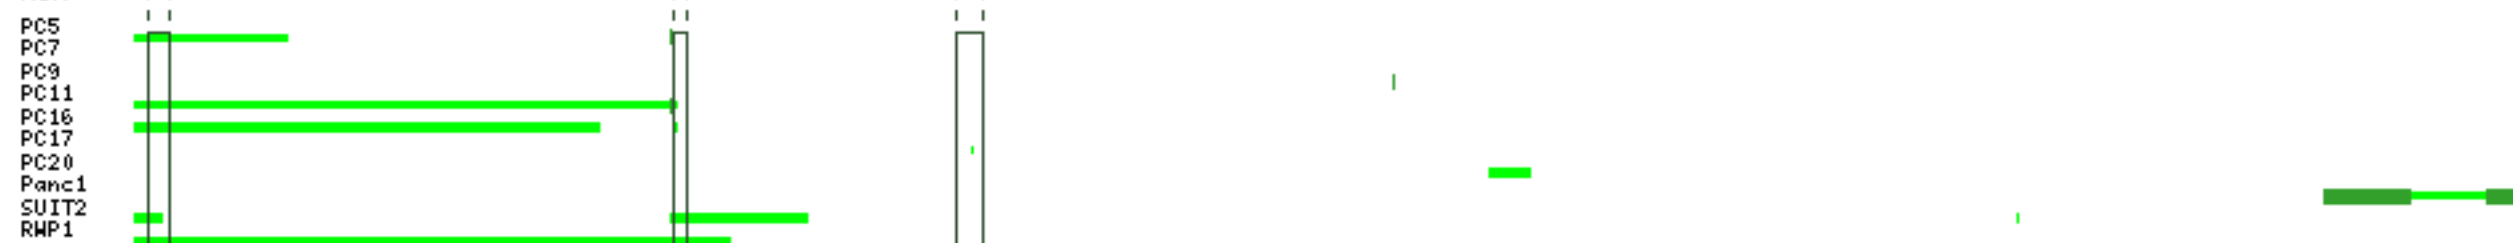

**L**  
MSA

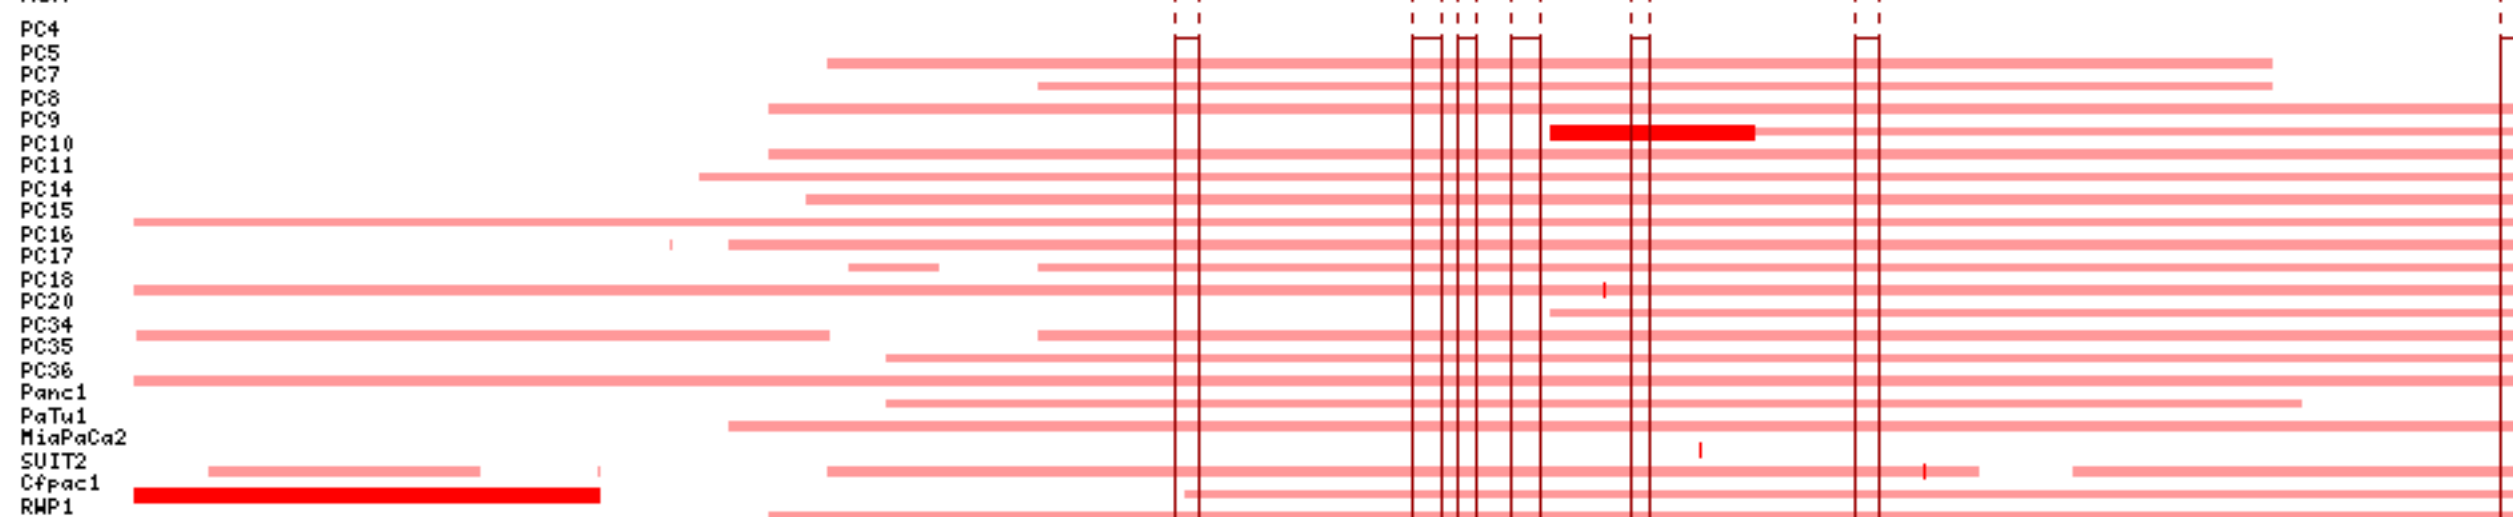

Redon et al., 2006

■ Gain ■ Loss ■ Multi-allelic or Complex

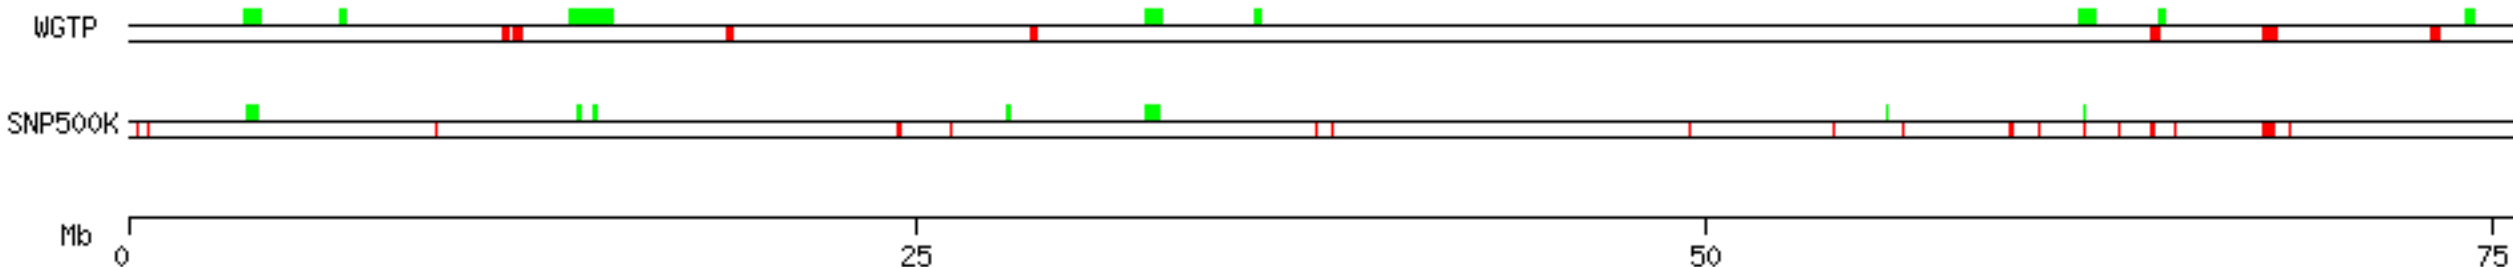

CHROMOSOME : chr19  
Length : 63811651 bp

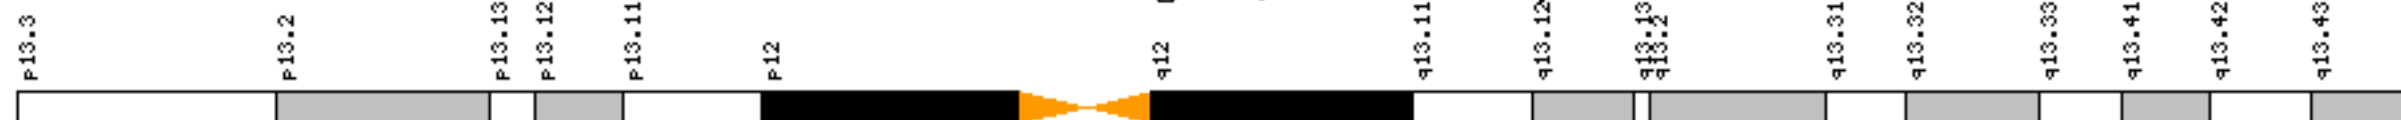

### G MSA

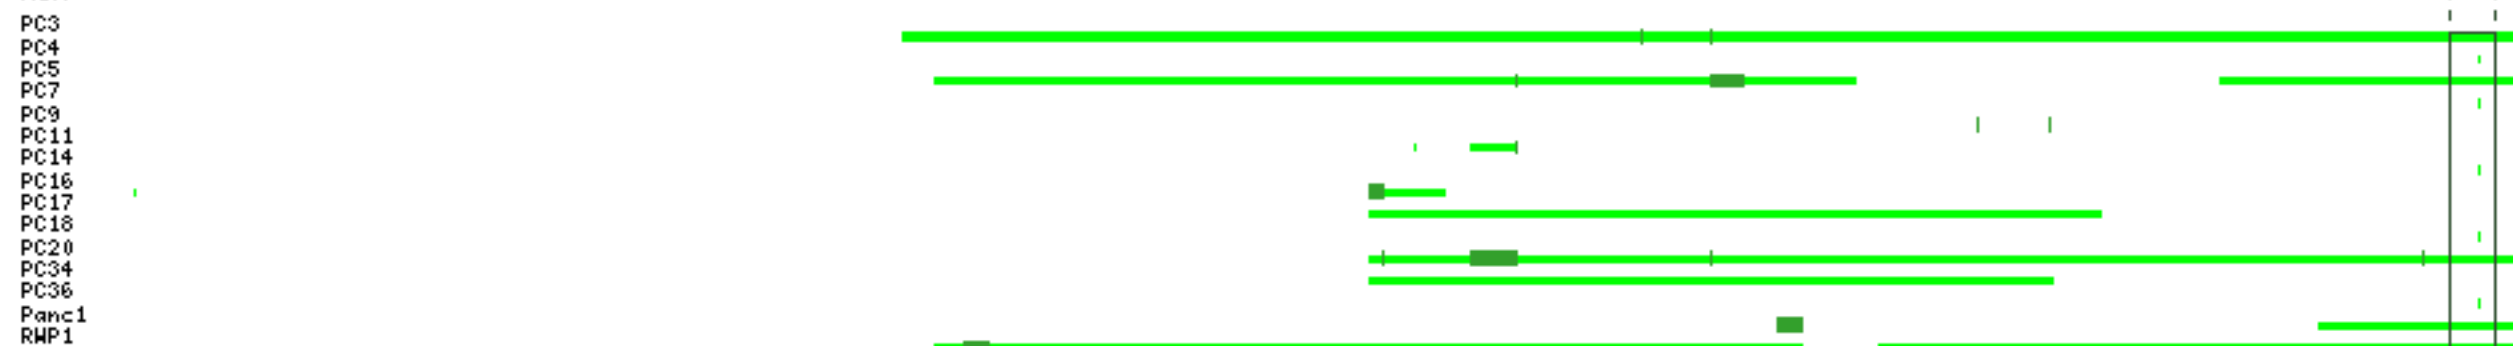

### L MSA

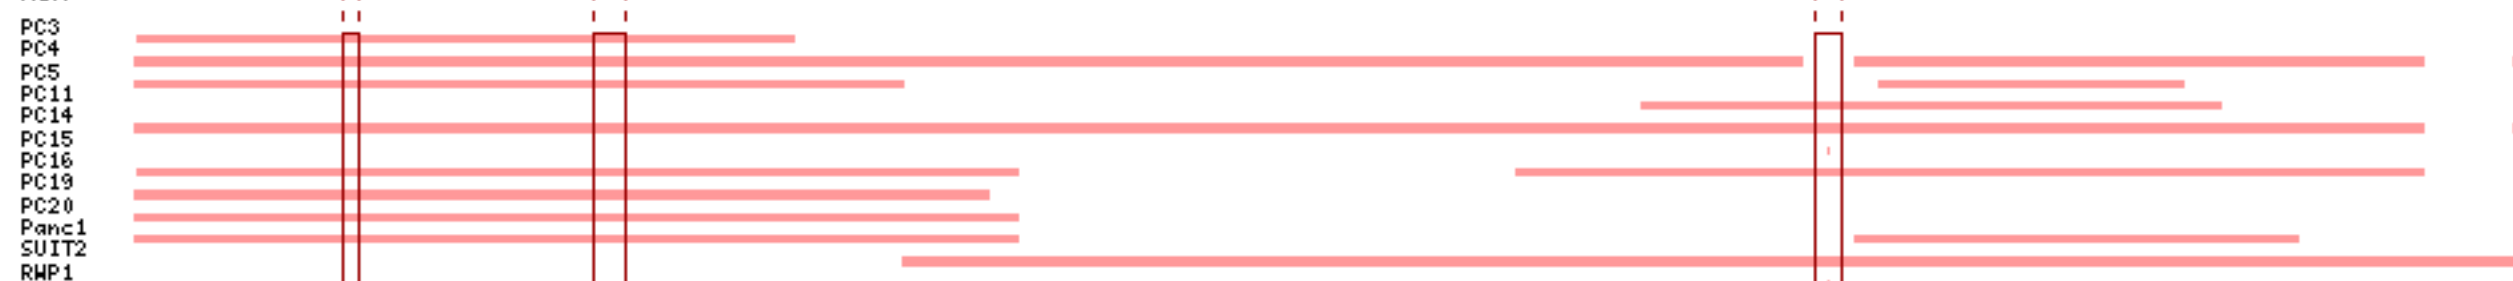

Redon et al., 2006

Gain

Loss

Multi-allelic or Complex

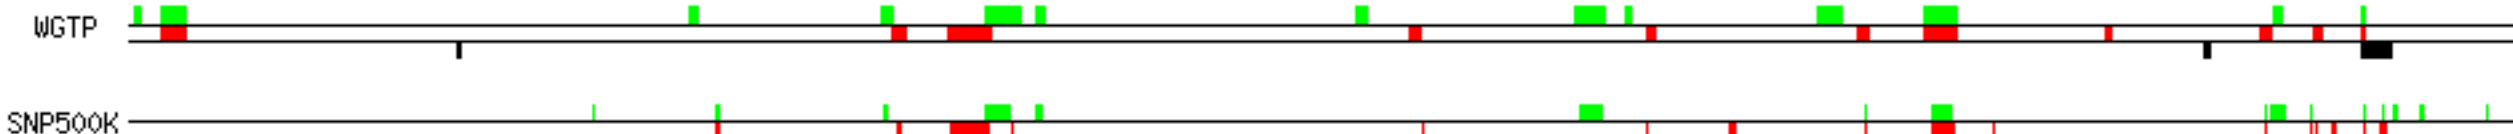

Mb

0

25

50

CHROMOSOME : chr20  
Length : 62435964 bp

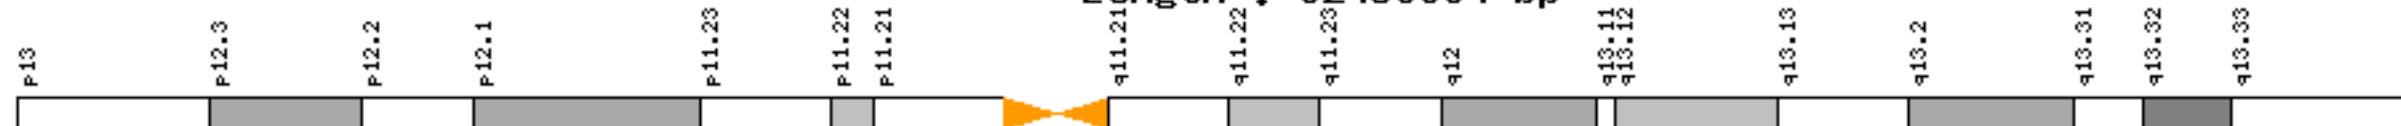

G  
MSA

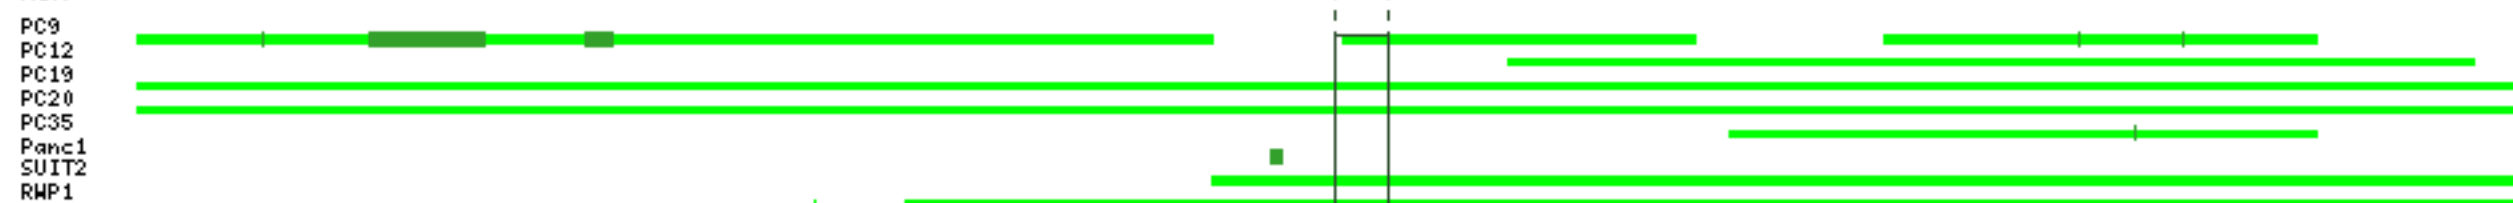

L

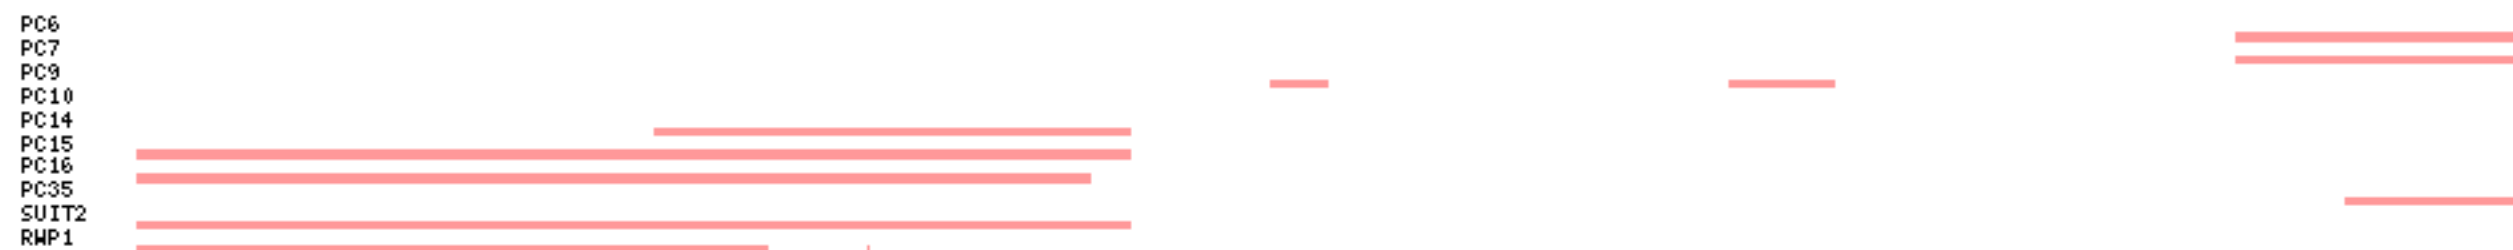

Redon et al., 2006

Gain

Loss

Multi-allelic or Complex

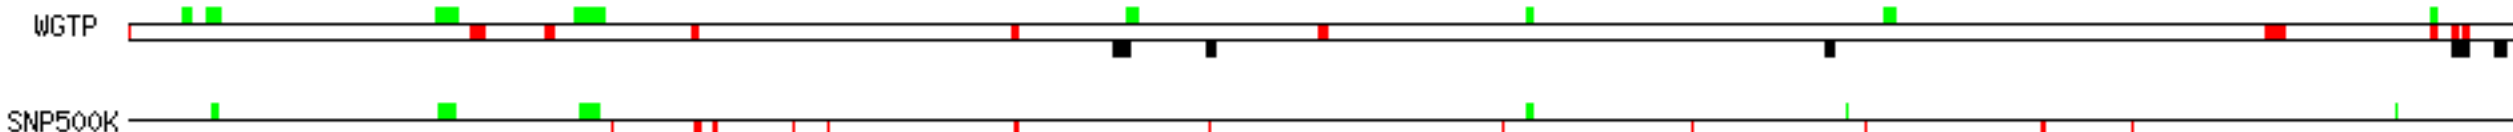

Mb

0

25

50

CHROMOSOME : chr21  
Length : 46944323 bp

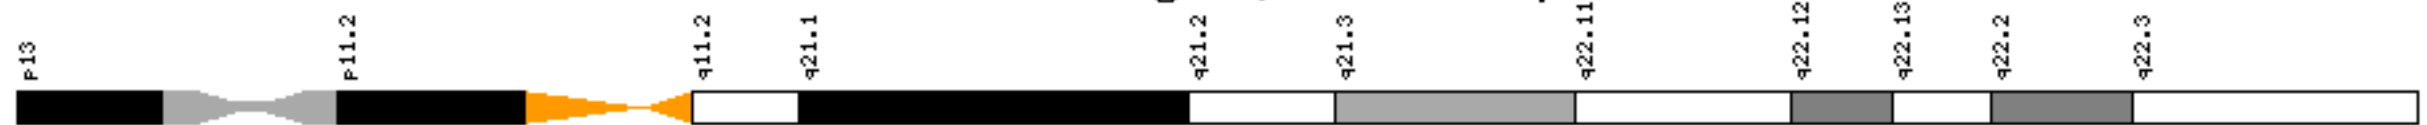

**G**

MSA

PC19  
MiaPaCa2

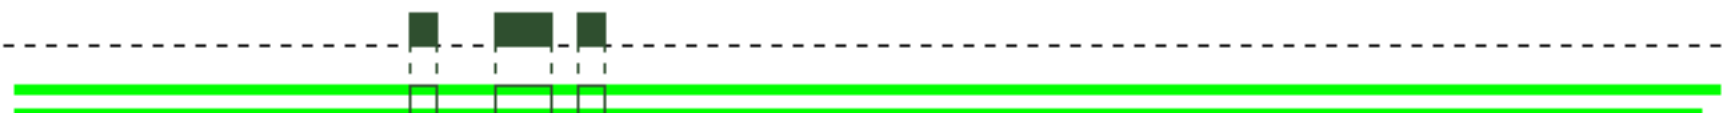

**L**

MSA

PC3  
PC15  
PC16  
PC17  
PC18  
PC20  
PC34  
Panc1  
SUIT2

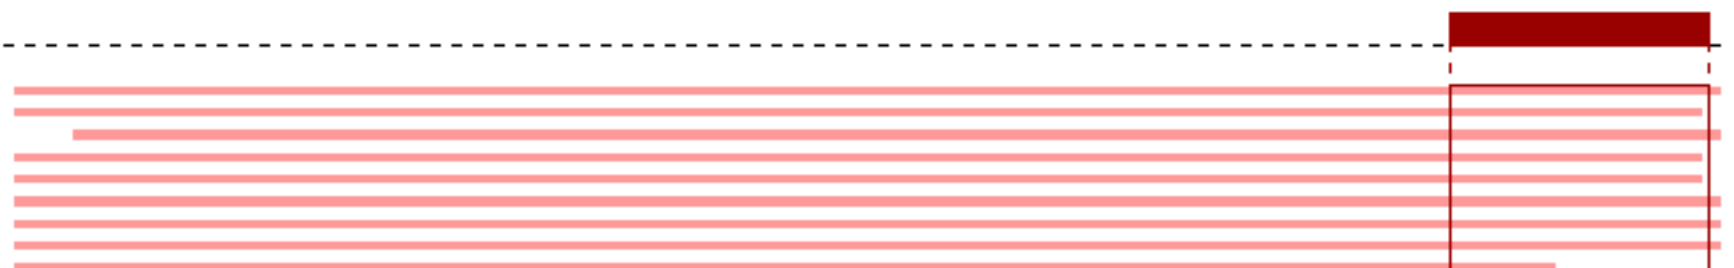

Redon et al., 2006

■ Gain

■ Loss

■ Multi-allelic or Complex

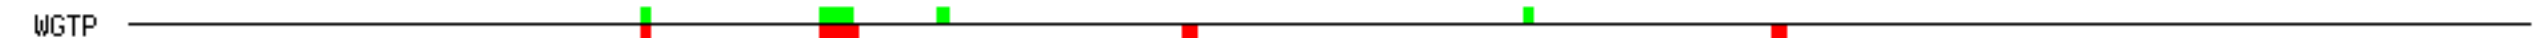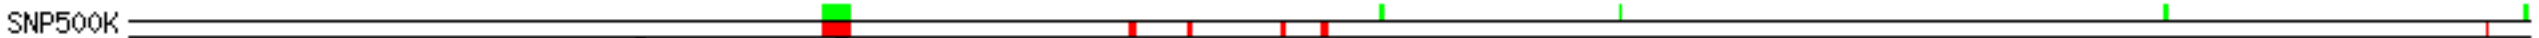

Mb

0 25

CHROMOSOME : chr22  
Length : 49554710 bp

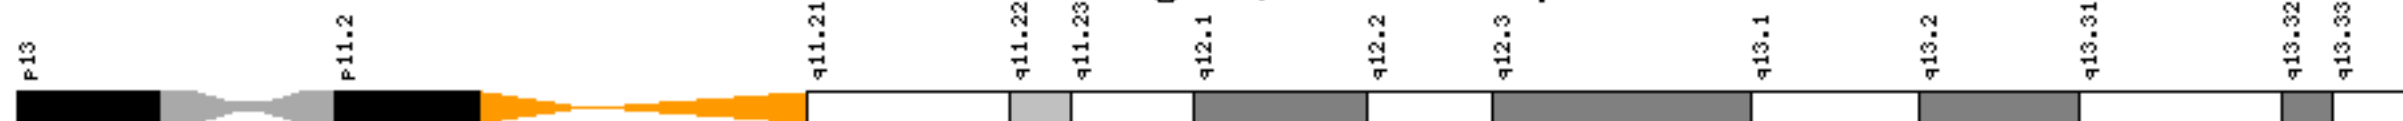

G

PC17  
PC18  
SUIT2

L  
MSA

PC3  
PC5  
PC9  
PC13  
PC15  
PC17  
PC19  
PC20  
PC34  
Panc1  
MiaPaCa2  
RWP1

Redon et al., 2006

Gain

Loss

Multi-allelic or Complex

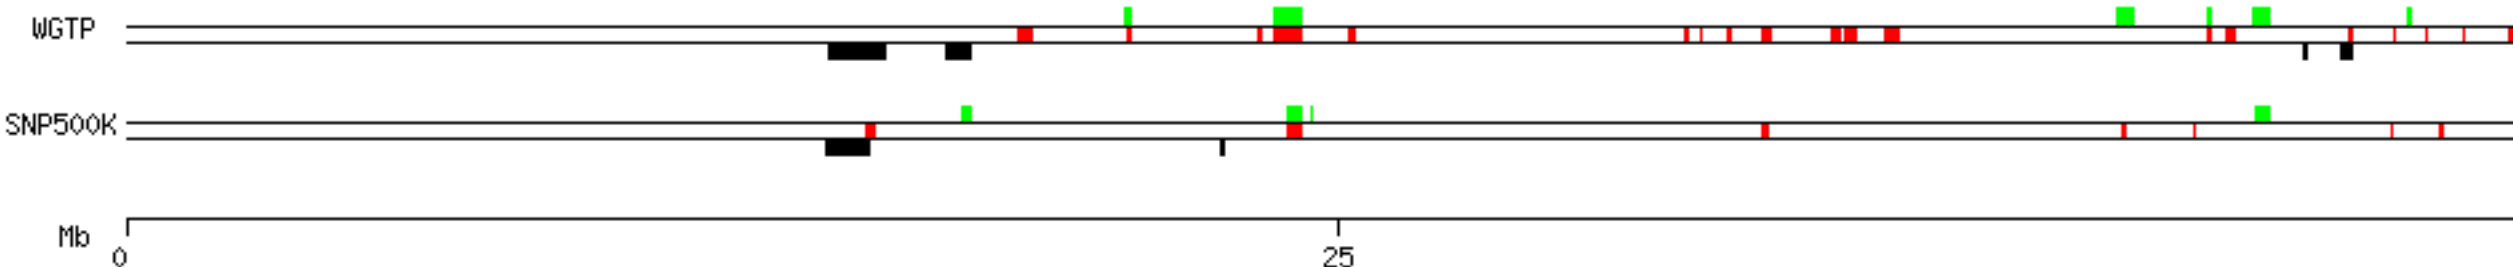

CHROMOSOME : chrX  
Length : 154824264 bp

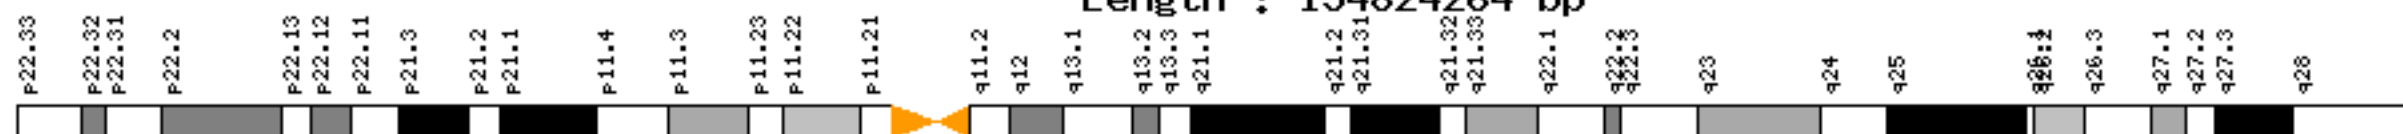

G

MSA

PC3

PC6

PC18

PC35

Panc1

MiaPaCa2

SUIT2

L

MSA

PC4

PC5

PC8

PC9

PC11

PC12

PC15

PC16

PC17

PC18

PC20

PC34

Panc1

PaTu1

MiaPaCa2

SUIT2

RWP1

Redon et al., 2006

Gain

Loss

Multi-allelic or Complex

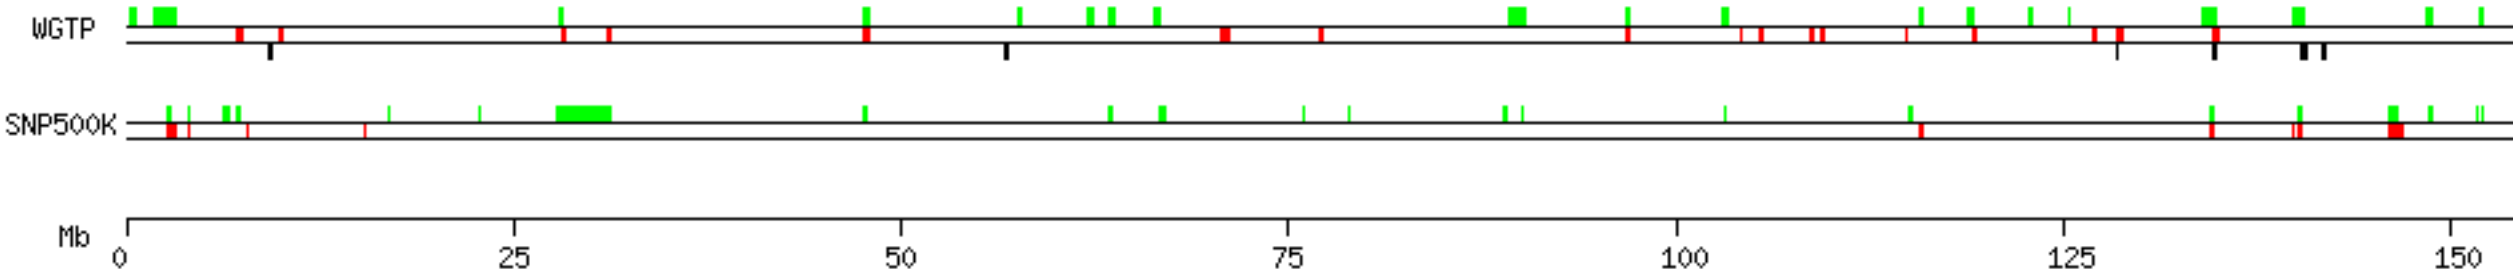

Supplement: Supplementary file 1 [file 1]
