# Supplementary material
Source: publisher figshare collection journal article supplement (https://karger.figshare.com/articles/dataset/_/5442418)
Supplement: Supplementary file 3 [file 1]

Archive with 6 entries (6 files):
- Fig1.pdf
- Fig2.jpg
- Legends.pdf
- Tab1.xls
- Tab2.xls
- Tab3.xls
