# Supplementary material
Source: publisher figshare collection journal article supplement (https://karger.figshare.com/articles/dataset/_/5442418)
Supplement: Supplementary file 3 [file 1 › Tab1.xls]

## Sheet: Suppl Table 1
Supplementary Table 1. A list of PDAC samples analysed by array CGH (n=29)
Sample	Age	Sex	Locationa	Histologyb	T	N	M	Stage		Sanger CGH arraysc
PC1	66	F	P(Ph)	mod	3	0	0	II		s651-10	3075 (99%)	s651-29	3062 (99%)
PC2	66	F	P(Pb)	well	3	1a	0	III		s641-26	3024 (97%)	s651-15	3039 (98%)
PC3	66	M	P(Ph)	mod	3	1b	0	III		s641-7	3076 (99%)	s641-41	3066 (99%)
PC4	59	F	P(Ph)	mod	3	1b	0	III		s641-18	3066 (99%)	s641-48	3027 (98%)
PC5	64	M	P(Ph)	mod	3	1b	0	III		s641-20	2835 (91%)	-	-
PC6	47	M	P(Ph)	mod	4	1b	0	IVa		s641-8	3070 (99%)	s651-8	3067 (99%)
PC7	66	M	P(Ph)	mod	4	1b	0	IVa		s641-19	3071 (99%)	s651-9	3060 (99%)
PC8	69	F	P(Ph)	poor	4	1b	0	IVa		s641-35	3069 (99%)	s651-16	3057 (98%)
PC9	73	F	P(Ph)	mod	4	1b	0	IVa		s641-21	3036 (98%)	s651-11	3036 (98%)
PC10	56	M	P(Pt)	mod	4	1b	1	IVb		s651-30	3050 (98%)	s654-37	3056 (98%)
PC11	76	F	P(Ph)	mod	4	1b	1	IVb		s641-23	3066 (99%)	s641-10	3064 (99%)
PC12	63	F	P(Pb)	mod	4	1b	1	IVb		s641-34	3079 (99%)	s641-47	3078 (99%)
PC13	78	F	P(Pt)	mod	4	1b	1	IVb		s641-43	3063 (99%)	s651-12	2967 (96%)
PC14	68	F	P(Ph)	mod	4	1b	1	IVb		s641-44	3057 (98%)	s651-32	3066 (99%)
PC15	65	M	P(Pb)	mod	4	1b	1	IVb		s641-15	3005 (97%)	s651-6	3073 (99%)
PC16	65	M	P(Ph)	mod	4	1b	1	IVb		s651-7	3069 (99%)	s654-42	3054 (98%)
PC17	60	M	P(Ph)	mod	4	1b	1	IVb		s597-29	3031 (98%)	s641-42	3073 (99%)
PC18	76	M	P(Ph)	mod	4	1b	1	IVb		s641-13	3068 (99%)	s641-31	3074 (99%)
PC19	54	F	P(Pb)	poor	4	1b	1	IVb		s641-37	3069 (99%)	s651-5	3018 (97%)
PC20	72	F	P(Pt)	mod	4	1b	1	IVb		s641-9	3033 (98%)	s651-3	3074 (99%)
PC34	60	M	LM	mod	4	1b	1	IVb		s641-25	3068 (99%)	s657-19	3028 (98%)
PC35	75	M	LM	mod	4	1b	1	IVb		s641-38	3062 (99%)	s654-47	3076 (99%)
PC36	67	F	LM	mod	4	1b	1	IVb		s651-27	3061 (99%)	s654-35	3071 (99%)
Panc1	cell line		P							s654-33	3061 (99%)	-	-
PaTu1	cell line		P							s654-41	3077 (99%)	-	-
MiaPaCa2	cell line		P							s654-48	3070 (99%)	-	-
SUIT2	cell line		LM							s654-34	3048 (98%)	s454-7	2974 (96%)
Cfpac1	cell line		LM							s654-38	3076 (99%)	-	-
RWP1	cell line		LM							s654-40	3076 (99%)	-	-
aP, primary lesion; Ph, head; Pb, body; Pt, tail of the pancreas; LM, liver metastatic lesion
bmod, moderately; poor, poorly differentiated tubular adenocarcinoma
cLot number of Sanger CGH arrays used. The number (percentage) of spots successfully detected
by the SPOT software are also shown.
