# Supplementary material
Source: publisher figshare collection journal article supplement (https://karger.figshare.com/articles/dataset/_/5442418)
Supplement: Supplementary file 3 [file 1 › Tab2.xls]

## Sheet: Suppl Table 2
Supplementary Table 2. Minimal common regions (MCRs) of non-random genetic gains in PDAC
Cytoband	Start (bp)	End (bp)	Size (Mb)	Frequency	P value	MCRa		PDACb		PanINb		MCR outputc
						No.	Genes included	No.	Genes	No.	Genes	PC1	PC2	PC3	PC4	PC5	PC6	PC7	PC8	PC9	PC10	PC11	PC12	PC13	PC14	PC15	PC16	PC17	PC18	PC19	PC20	PC34	PC35	PC36	Panc1	PaTu1	MiaPaCa2	SUIT2	Cfpac1	RWP1
1q23.1-q23.2	156591077	157602759	1.01168	76% (22/29)	0.00533067	30	ENSG00000158488[CD1E], ENSG00000196333[--], ENSG00000186306[OR10T2], ENSG00000180708[OR10K2], ENSG00000203758[--], ENSG00000173285[OR10K1], ENSG00000198965[OR10R2], ENSG00000198703[OR10R3P], ENSG00000197532[OR6Y1], ENSG00000186440[OR6P1], ENSG00000186400[OR10X1], ENSG00000198967[OR10Z1], ENSG00000163554[SPTA1], ENSG00000196171[OR6K2], ENSG00000203757[OR6K3], ENSG00000180437[Q8NGY4_HUMAN], ENSG000…	3	ENSG00000163565[IFI16], ENSG00000163568[AIM2], ENSG00000179639[FCER1A],	0		0	0	0	1	1	1	1	1	1	0	1	0	1	1	1	1	1	0	1	1	1	1	1	1	1	1	0	1	1
1q25.1	172632928	173462394	0.829467	79% (23/29)	0.00266533	9	ENSG00000152061[RABGAP1L], ENSG00000203737[GPR52], ENSG00000208302[--], ENSG00000116161[CACYBP], ENSG00000120333[MRPS14], ENSG00000206659[Y], ENSG00000181101[--], ENSG00000120332[TNN], ENSG00000162666[KIAA0040],	0		0		0	0	1	0	1	1	1	1	1	1	0	0	1	0	1	1	1	1	1	1	1	1	1	1	1	1	1	1	1
1q25.1-q25.2	174098656	174792564	0.693909	83% (24/29)	0.00266533	4	ENSG00000179969[Q5W057_HUMAN], ENSG00000143207[RFWD2], ENSG00000202426[U7], ENSG00000116183[PAPPA2],	0		0		0	0	1	0	1	1	1	1	1	1	1	0	1	1	1	1	1	1	1	1	1	1	1	1	1	1	1	1	0
1q31.2	189012940	189640525	0.627586	79% (23/29)	0.00266533	1	ENSG00000207059[Y],	0		0		1	1	1	1	1	1	1	1	1	1	1	0	1	1	1	0	1	0	1	1	1	1	1	1	1	1	0	0	0
1q31.2	190940606	191897513	0.956908	83% (24/29)	0.00266533	8	ENSG00000198708[388720], ENSG00000116741[RGS2], ENSG00000202038[7SK], ENSG00000116750[UCHL5], ENSG00000116747[TROVE2], ENSG00000023572[GLRX2], ENSG00000134371[CDC73], ENSG00000162630[B3GALT2],	0		0		1	0	1	1	0	1	1	1	1	1	0	0	1	1	1	1	1	1	1	1	1	1	1	1	1	1	0	1	1
1q31.2-q31.3	191897513	192833019	0.935507	76% (22/29)	0.00533067	3	ENSG00000208232[--], ENSG00000208231[--], ENSG00000208230[--],	0		0		1	0	1	0	0	1	1	1	1	1	1	1	1	1	1	0	1	1	1	1	1	1	1	1	1	1	0	0	0
1q31.3	192833019	193928417	1.0954	86% (25/29)	0.00266533	0		0		0		1	1	1	1	0	1	1	1	1	1	1	0	1	1	1	1	1	0	1	1	1	1	1	1	1	1	0	1	1
1q31.3	195125528	196179631	1.0541	76% (22/29)	0.00533067	11	ENSG00000134365[CFHR4], ENSG00000134391[CFHR2], ENSG00000134389[CFHR5], ENSG00000143278[F13B], ENSG00000066279[ASPM], ENSG00000177888[ZBTB41], ENSG00000134376[CRB1], ENSG00000162701[DENND1B], ENSG00000207139[Y], ENSG00000203724[C1orf53], ENSG00000143355[LHX9],	0		0		1	1	0	1	0	1	1	1	1	1	1	0	1	1	1	0	1	0	1	1	1	1	1	0	1	1	0	1	1
1q31.3-q32.1	197274194	198251428	0.977235	76% (22/29)	0.00533067	4	ENSG00000208226[--], ENSG00000200139[U6], ENSG00000202491[U6], ENSG00000202329[U6],	0		0		1	0	1	1	0	1	1	1	1	1	1	0	1	1	1	0	1	1	1	1	1	1	1	0	1	1	0	0	1
1q32.3	210637543	211466127	0.828585	86% (25/29)	0.00266533	17	ENSG00000065600[C1orf75], ENSG00000117691[NENF], ENSG00000203259[--], ENSG00000162772[ATF3], ENSG00000176303[Q8N822_HUMAN], ENSG00000162771[FAM71A], ENSG00000123685[NP_061134.1], ENSG00000207491[U6], ENSG00000117697[C1orf48], ENSG00000203705[TATDN3], ENSG00000185523[NP_001019772.1], ENSG00000198468[Q8TAF5_HUMAN], ENSG00000162769[FLVC1_HUMAN], ENSG00000143494[VASH2], ENSG00000174606[ANGEL2], ENSG0…	0		0		1	0	1	1	1	1	1	1	1	1	0	0	1	1	1	1	1	1	1	1	1	1	1	1	1	1	0	1	1
1q42.3	232834654	234059648	1.225	76% (22/29)	0.00533067	18	ENSG00000177107[Q8WYG7_HUMAN], ENSG00000201638[Y], ENSG00000208115[--], ENSG00000173726[TOMM20], ENSG00000207181[snoACA14], ENSG00000188739[RBM34], ENSG00000054267[ARID4B], ENSG00000152904[GGPS1], ENSG00000116957[TBCE], ENSG00000162885[B3GALNT2], ENSG00000208113[--], ENSG00000208111[--], ENSG00000208109[--], ENSG00000208108[--], ENSG00000208107[--], ENSG00000168243[GNG4], ENSG00000203674[Q6ZTZ4_H…	0		0		0	0	1	1	1	1	1	1	1	0	0	0	1	1	1	1	1	1	1	1	1	0	1	1	1	1	1	1	0
2p22.3	32012487	32842602	0.830116	86% (25/29)	0.00266533	17	ENSG00000162959[C2orf4], ENSG00000211081[--], ENSG00000162961[DPY30_HUMAN], ENSG00000021574[SPAST], ENSG00000211086[--], ENSG00000152683[SLC30A6], ENSG00000201113[U6], ENSG00000091106[CARD12], ENSG00000119820[YIPF4], ENSG00000211097[--], ENSG00000115760[BIRC6], ENSG00000203490[--], ENSG00000207653[hsa-mir-558], ENSG00000203489[--], ENSG00000203488[--], ENSG00000018699[TTC27], ENSG00000196125[--],	0		0		1	1	1	1	1	1	1	1	1	1	0	1	1	1	1	1	1	1	0	1	1	1	1	1	0	1	1	0	1
2p22.3	34092308	36005738	1.91343	48% (14/29)	0.007996	1	ENSG00000207255[U6],	0		0		0	0	0	1	0	0	1	0	1	1	0	1	1	1	1	1	0	0	0	1	0	1	1	1	0	1	0	0	0
2p22.1	38421421	39356423	0.935003	66% (19/29)	0.007996	14	ENSG00000119787[ARL6IP2], ENSG00000143889[HNRPLL], ENSG00000143891[GALM], ENSG00000115875[SFRS7], ENSG00000152147[GEMIN6], ENSG00000163214[DHX57], ENSG00000188010[MORN2], ENSG00000207295[U6], ENSG00000177102[Q8N2V9_HUMAN], ENSG00000115904[SOS1], ENSG00000206985[U6], ENSG00000202309[Y], ENSG00000205111[CDKL4], ENSG00000011566[MAP4K3],	0		0		1	0	1	1	0	0	1	1	1	1	0	1	1	1	1	1	0	1	0	1	0	1	1	1	0	1	0	0	1
2p16.3	49211534	49943526	0.731993	48% (14/29)	0.007996	2	ENSG00000170820[FSHR], ENSG00000206915[U6],	0		0		0	1	1	1	1	0	0	1	1	0	0	1	1	1	0	0	0	0	0	1	0	0	1	1	0	1	0	0	1
2p16.3	50485140	50767519	0.28238	55% (16/29)	0.007996	1	ENSG00000205000[--],	0		0		1	1	1	1	1	0	1	1	1	1	0	1	1	1	0	0	0	0	0	1	0	1	1	0	0	1	0	0	0
2p16.3	52211003	52642884	0.431882	55% (16/29)	0.007996	1	ENSG00000202195[Y],	0		0		1	1	1	1	1	0	1	1	1	1	1	1	1	1	0	0	0	0	0	1	0	0	1	1	0	0	0	0	0
2p15	61181674	62979327	1.79765	69% (20/29)	0.007996	18	ENSG00000162929[KIAA1841], ENSG00000173215[Q96HQ8_HUMAN], ENSG00000173209[AHSA2], ENSG00000115464[USP34], ENSG00000206937[U70], ENSG00000082898[XPO1], ENSG00000206973[U6], ENSG00000170264[NP_115556.1], ENSG00000115484[CCT4], ENSG00000173163[COMMD1], ENSG00000209229[--], ENSG00000170340[B3GNT2], ENSG00000209225[--], ENSG00000209133[--], ENSG00000209260[--], ENSG00000186889[TMEM17], ENSG00000115504…	1	ENSG00000173209[AHSA2],	2	ENSG00000082898[XPO1], ENSG00000115484[CCT4],	0	1	1	1	1	1	1	1	1	1	1	1	1	1	1	1	0	1	1	0	0	1	0	0	0	1	1	0	0
2p15	62979327	63933421	0.954095	86% (25/29)	0.00266533	11	ENSG00000115504[EHBP1], ENSG00000115507[OTX1], ENSG00000181177[Q9NRE5_HUMAN], ENSG00000143951[NP_056994.3], ENSG00000209139[--], ENSG00000209278[--], ENSG00000203415[--], ENSG00000014641[MDH1], ENSG00000119838[649930], ENSG00000181059[Q8N9N3_HUMAN], ENSG00000169764[UGP2],	0		0		1	1	1	1	1	1	1	1	1	1	1	0	0	1	1	1	1	1	1	1	0	1	1	1	1	1	1	0	1
2p12	76713806	77564580	0.850775	52% (15/29)	0.007996	2	ENSG00000176204[LRRTM4], ENSG00000200028[5S_rRNA],	0		0		1	1	1	1	0	1	0	0	1	1	1	1	1	1	0	0	0	0	1	1	0	1	1	0	0	0	0	0	0
2p12	77564580	78399933	0.835354	55% (16/29)	0.007996	2	ENSG00000176204[LRRTM4], ENSG00000208894[--],	0		0		0	1	1	1	0	0	1	0	1	1	1	0	1	1	1	1	0	0	1	1	0	1	1	0	0	1	0	0	0
2p12	78399933	79351736	0.951804	62% (18/29)	0.007996	8	ENSG00000176268[Q49AU1_HUMAN], ENSG00000202423[U6], ENSG00000200048[U6], ENSG00000143954[REG3G], ENSG00000172023[REG1B], ENSG00000115386[REG1A], ENSG00000204787[REGL], ENSG00000172016[REG3A],	0		0		1	1	1	1	1	1	1	0	1	1	1	0	1	1	0	1	0	0	1	1	0	0	1	1	0	0	0	0	1
2q12.1	103350775	104439474	1.0887	48% (14/29)	0.007996	0		0		0		1	0	1	1	0	0	0	0	1	1	1	1	0	0	0	1	0	0	1	1	0	1	1	1	0	0	0	0	1
2q14.1	115757132	116156371	0.39924	66% (19/29)	0.007996	1	ENSG00000175497[DPP10],	0		0		1	1	1	1	1	1	1	0	1	1	1	1	1	1	1	1	0	0	1	1	0	0	1	1	0	0	0	0	0
2q14.1	116156371	116851751	0.695381	76% (22/29)	0.00266533	1	ENSG00000175497[DPP10],	0		0		1	1	1	1	1	1	1	1	1	1	1	1	1	1	1	1	0	0	1	1	0	1	1	1	0	1	0	0	0
2q14.3	122949117	125093649	2.14453	62% (18/29)	0.007996	2	ENSG00000199841[7SK], ENSG00000155052[CNTNAP5],	0		0		1	1	1	1	0	1	1	1	1	1	1	1	1	1	0	0	0	0	1	1	0	0	1	0	0	1	0	0	1
2q24.1	156052886	156831720	0.778835	69% (20/29)	0.007996	0		0		0		1	1	1	1	0	1	1	0	1	1	1	1	1	1	1	0	0	0	1	1	0	1	1	1	0	0	1	0	1
2q24.3	164768678	165569582	0.800905	72% (21/29)	0.00266533	7	ENSG00000115290[GRB14], ENSG00000082438[COBLL1], ENSG00000206869[U70], ENSG00000208214[--], ENSG00000199508[5S_rRNA], ENSG00000208213[--], ENSG00000169507[NP_775783.1],	0		0		1	1	1	1	1	1	1	1	1	1	1	1	1	1	0	0	0	1	1	1	0	1	1	0	0	0	1	0	1
2q32.1	184842393	185567487	0.725095	69% (20/29)	0.007996	2	ENSG00000170396[C2orf10], ENSG00000177812[Q53R30_HUMAN],	0		0		1	1	1	1	0	1	1	0	1	1	1	1	1	1	1	1	0	1	1	1	0	1	1	1	0	0	0	0	0
2q32.1	185567487	186136592	0.569106	76% (22/29)	0.00266533	0		0		0		1	1	1	1	1	1	1	0	1	1	1	1	1	1	1	1	0	1	1	1	0	1	1	1	0	1	0	0	0
2q32.2	189631673	190422048	0.790376	76% (22/29)	0.00266533	9	ENSG00000204262[COL5A2], ENSG00000115368[WDR75], ENSG00000138449[SLC40A1], ENSG00000138381[ASNSD1], ENSG00000151687[ANKAR], ENSG00000128694[OSGEPL1], ENSG00000201540[Y], ENSG00000128699[ORMDL1], ENSG00000064933[PMS1],	2	ENSG00000204262[COL5A2], ENSG00000128699[ORMDL1],	1	ENSG00000138449[SLC40A1],	1	0	1	1	1	1	1	1	1	1	1	1	0	1	1	1	1	1	1	0	0	1	1	1	0	1	0	0	1
2q34	213522881	215064185	1.5413	69% (20/29)	0.007996	7	ENSG00000030419[IKZF2], ENSG00000196096[Q6ZV57_HUMAN], ENSG00000144451[SPAG16], ENSG00000208087[--], ENSG00000200744[Y], ENSG00000208083[--], ENSG00000174453[402117],	0		0		1	0	1	1	1	1	1	1	1	1	1	1	1	1	0	0	0	1	1	1	0	1	1	1	0	0	0	0	1
3q13.33	122105868	123010309	0.904442	79% (23/29)	0.007996	10	ENSG00000145087[STXBP5L], ENSG00000051341[POLQ], ENSG00000186103[ARGFX], ENSG00000209222[--], ENSG00000163833[FBXO40], ENSG00000180353[HCLS1], ENSG00000209172[--], ENSG00000201914[U4], ENSG00000173230[GOLGB1], ENSG00000173226[IQCB1],	0		0		1	0	1	1	1	1	0	1	1	1	1	0	1	1	1	1	0	1	0	1	1	1	1	1	1	1	1	1	0
3q24	149506164	150011437	0.505274	76% (22/29)	0.007996	1	ENSG00000144891[AGTR1],	0		0		1	1	0	1	1	1	1	1	1	1	1	0	1	1	1	1	0	1	1	0	0	1	1	1	1	1	0	1	0
3q25.1	153157638	153424169	0.266532	79% (23/29)	0.007996	0		0		0		1	0	1	1	1	1	1	1	1	0	1	0	0	1	1	1	0	1	1	1	0	1	1	1	1	1	1	1	1
3q25.1-q25.2	153424169	153721599	0.297431	90% (26/29)	0.00266533	3	ENSG00000152601[MBNL1], ENSG00000189156[Q6UXP3_HUMAN], ENSG00000201217[Y],	0		0		1	1	1	0	1	1	1	1	1	1	1	0	1	1	1	1	0	1	1	1	1	1	1	1	1	1	1	1	1
3q25.32-q25.33	159291860	160422712	1.13085	83% (24/29)	0.00266533	9	ENSG00000168779[SHOX2], ENSG00000174891[RSRC1], ENSG00000197626[Q9NYD4_HUMAN], ENSG00000178053[MLF1], ENSG00000168827[GFM1], ENSG00000079257[LXN], ENSG00000118849[RARRES1], ENSG00000118855[MFSD1], ENSG00000182559[Q711G2_HUMAN],	1	ENSG00000118849[RARRES1],	0		1	1	1	1	0	1	1	1	1	1	1	0	1	1	1	1	0	1	1	1	1	1	1	1	1	1	0	1	0
3q26.31	173518831	174116425	0.597595	76% (22/29)	0.00533067	15	ENSG00000075420[FNDC3B], ENSG00000203642[--], ENSG00000121853[GHSR], ENSG00000203641[--], ENSG00000121858[TNFSF10], ENSG00000203640[--], ENSG00000144959[AADACL1], ENSG00000203639[--], ENSG00000121876[Q9P1K3_HUMAN], ENSG00000208518[--], ENSG00000196714[Q6ZRN9_HUMAN], ENSG00000114346[ECT2], ENSG00000200355[U72], ENSG00000201458[U4], ENSG00000144962[SPATA16],	1	ENSG00000144959[AADACL1],	0		0	0	1	1	1	1	1	1	1	1	0	0	0	1	1	1	0	1	1	1	1	1	0	1	1	1	1	1	1
4p15.1	34100879	34936314	0.835436	69% (20/29)	0.00266533	1	ENSG00000210088[--],	0		0		1	0	1	1	1	1	1	0	1	1	1	1	1	1	1	0	1	1	1	1	1	1	0	0	0	0	1	0	0
4p13	43511033	45147888	1.63686	62% (18/29)	0.00533067	7	ENSG00000163281[GNPDA2], ENSG00000183190[--], ENSG00000210325[--], ENSG00000124399[402175], ENSG00000183783[KCTD8], ENSG00000177752[YIPF7], ENSG00000151806[GUF1],	0		0		1	1	1	1	1	0	1	0	1	1	1	1	1	1	1	0	1	0	1	1	1	0	0	0	1	0	0	0	0
4p13-p12	45147888	46520763	1.37288	69% (20/29)	0.00266533	7	ENSG00000199670[7SK], ENSG00000200720[U6], ENSG00000163285[GABRG1], ENSG00000151834[GABRA2], ENSG00000172895[651919], ENSG00000170516[COX7B2], ENSG00000199669[U6],	0		0		1	1	1	1	1	1	1	0	1	1	1	1	1	1	1	0	1	1	1	1	1	0	0	0	1	0	0	0	0
5q13.2	68616072	70780728	2.16466	55% (16/29)	0.00533067	33	ENSG00000210838[--], ENSG00000152939[MARVELD2], ENSG00000081770[BIRC1], ENSG00000197822[OCLN], ENSG00000183474[NP_001035955.1], ENSG00000145736[TF2H2_HUMAN], ENSG00000188948[Q6ZNT7_HUMAN], ENSG00000205576[--], ENSG00000205575[GUSL2_HUMAN], ENSG00000205552[--], ENSG00000205574[653188], ENSG00000205573[--], ENSG00000205551[--], ENSG00000205550[GUSL4_HUMAN], ENSG00000205572[SERF1_HUMAN], ENSG0000016…	2	ENSG00000081770[BIRC1], ENSG00000179978[Q59GI6_HUMAN],	0		0	0	1	0	1	1	1	0	1	0	0	1	0	0	1	1	0	1	0	1	0	1	0	1	1	1	0	1	1
5q13.3	74364377	75289234	0.924858	83% (24/29)	0.00533067	9	ENSG00000207333[U6], ENSG00000202173[U7], ENSG00000113163[COL4A3BP], ENSG00000122008[POLK], ENSG00000189045[--], ENSG00000152359[NP_689621.1], ENSG00000205519[NP_001013738.1], ENSG00000145700[ANKRD31], ENSG00000113161[HMGCR],	0		1	ENSG00000113163[COL4A3BP],	1	0	1	1	0	0	1	1	1	1	1	1	1	1	1	1	1	1	1	1	1	1	1	1	0	1	1	1	0
5q21.1	97551154	98553078	1.00192	90% (26/29)	0.00266533	9	ENSG00000200351[Y], ENSG00000211353[--], ENSG00000174144[--], ENSG00000174136[RGMB], ENSG00000205367[Q69YY3_HUMAN], ENSG00000153922[CHD1], ENSG00000176183[--], ENSG00000211351[--], ENSG00000211349[--],	0		0		1	1	0	1	1	1	1	1	1	1	1	1	1	1	1	1	1	1	1	1	1	1	1	1	0	1	1	1	0
5q21.1	99479362	100368525	0.889164	83% (24/29)	0.00533067	4	ENSG00000207269[7SK], ENSG00000207077[U6], ENSG00000174132[TMEM157], ENSG00000113532[ST8SIA4],	0		0		1	1	1	1	1	1	1	0	1	1	1	1	1	1	1	1	1	0	1	1	1	1	1	1	0	1	0	1	0
5q23.3	128882292	129472350	0.590059	83% (24/29)	0.00533067	4	ENSG00000208941[--], ENSG00000186367[U258_HUMAN], ENSG00000198108[CHSS3_HUMAN], ENSG00000145808[ADAMTS19],	0		0		1	1	1	0	1	1	1	1	1	1	1	1	1	1	1	1	1	0	0	1	0	1	1	1	1	1	1	1	0
5q31.1	130836764	131260927	0.424164	83% (24/29)	0.00533067	3	ENSG00000177622[--], ENSG00000158987[RAPGEF6], ENSG00000164398[ACSL6],	0		0		0	1	1	1	1	1	1	1	0	1	1	1	1	1	1	1	1	1	1	1	1	1	1	1	0	1	0	1	0
5q33.2-q33.3	155078493	156038723	0.960231	79% (23/29)	0.007996	5	ENSG00000208554[--], ENSG00000203367[--], ENSG00000200275[5S_rRNA], ENSG00000170624[SGCD], ENSG00000197423[NP10_HUMAN],	0		0		1	1	0	1	1	1	1	1	1	1	1	1	1	1	0	1	1	0	0	1	1	1	1	1	0	1	0	1	1
6p12.1	54458664	55813118	1.35445	62% (18/29)	0.00266533	6	ENSG00000211075[--], ENSG00000168143[FAM83B], ENSG00000137252[HCRTR2], ENSG00000187871[GFRAL], ENSG00000146151[HMGCLL1], ENSG00000112175[BMP5],	0		0		1	1	0	1	0	1	1	1	1	1	1	0	0	0	0	1	0	1	1	0	0	1	0	1	1	1	0	1	1
6q14.1	80074315	80680574	0.60626	66% (19/29)	0.00266533	3	ENSG00000197090[Q9H8D1_HUMAN], ENSG00000135338[CF152_HUMAN], ENSG00000198478[SH3BGRL2],	0		0		0	1	1	0	1	1	1	0	0	1	0	0	1	0	1	1	1	1	1	0	1	1	1	1	0	1	1	0	1
7p22.1	5892806	6067844	0.175039	55% (16/29)	0.00533067	10	ENSG00000122674[C7orf28A], ENSG00000155026[NM_173565.1], ENSG00000122512[PMS2], ENSG00000201990[Y], ENSG00000106305[MCA2_HUMAN], ENSG00000207217[snoACA42], ENSG00000086232[EIF2AK1], ENSG00000157999[--], ENSG00000210074[--], ENSG00000210080[--],	1	ENSG00000122674[C7orf28A],	1	ENSG00000122674[C7orf28A],	0	0	0	0	1	1	1	0	1	1	0	1	0	0	1	0	1	1	0	0	1	1	0	1	1	1	1	0	1
7p21.3	11406590	12318512	0.911923	83% (24/29)	0.00533067	3	ENSG00000005108[Q9UPZ6_HUMAN], ENSG00000106460[TMEM106B], ENSG00000203524[--],	0		0		1	0	0	1	1	1	1	1	1	1	1	1	1	1	1	0	1	1	1	1	1	1	1	1	1	1	0	0	1
7p21.2	13478099	14072741	0.594643	86% (25/29)	0.00266533	2	ENSG00000006468[ETV1], ENSG00000210208[--],	0		0		1	1	0	1	1	1	1	1	1	1	1	1	1	1	1	0	1	1	1	1	1	1	1	1	1	1	0	0	1
7p21.1-p15.3	18674349	19794901	1.12055	83% (24/29)	0.00533067	6	ENSG00000048052[HDAC9], ENSG00000210230[--], ENSG00000122691[TWIST1], ENSG00000146618[FERD3L], ENSG00000105849[TWISTNB], ENSG00000173452[NP_689987.2],	0		0		1	1	0	1	0	1	1	1	1	1	1	1	1	1	1	0	1	1	1	1	1	1	1	1	1	1	0	0	1
7p15.2	26640672	27455008	0.814337	83% (24/29)	0.00533067	16	ENSG00000005020[SCAP2], ENSG00000184579[--], ENSG00000105991[HOXA1], ENSG00000105996[HOXA2], ENSG00000105997[HOXA3], ENSG00000164519[Q96MZ3_HUMAN], ENSG00000197576[HOXA4], ENSG00000106004[HOXA5], ENSG00000106006[HOXA6], ENSG00000122592[HOXA7], ENSG00000078399[HOXA9], ENSG00000207584[hsa-mir-196b], ENSG00000153807[HOXA10], ENSG00000005073[HOXA11], ENSG00000106031[HOXA13], ENSG00000106038[EVX1],	3	ENSG00000105997[HOXA3], ENSG00000106004[HOXA5], ENSG00000005073[HOXA11],	2	ENSG00000005020[SCAP2], ENSG00000005073[HOXA11],	0	0	0	1	0	1	1	1	1	1	1	1	1	1	1	1	1	1	1	1	1	1	1	1	1	1	1	0	1
8q11.22	51258452	52213831	0.95538	66% (19/29)	0.00266533	2	ENSG00000201316[snoACA7], ENSG00000147481[SNTG1],	0		0		1	1	1	1	0	1	1	0	1	1	1	1	1	1	0	1	1	1	1	1	0	0	1	0	1	0	0	0	0
8q22.3	104733104	105127864	0.394761	69% (20/29)	0.00266533	2	ENSG00000208758[--], ENSG00000176406[RIMS2],	0		0		1	1	1	1	1	1	1	0	0	1	1	1	1	1	0	1	1	1	0	1	1	1	1	0	1	0	0	0	0
8q24.21	128606130	129690234	1.08411	48% (14/29)	0.00533067	5	ENSG00000202486[U4], ENSG00000136997[MYC], ENSG00000201782[7SK], ENSG00000207110[U1], ENSG00000184090[TMEM75],	0		0		0	0	1	1	0	0	0	1	1	0	0	0	0	0	1	0	1	1	0	1	1	1	0	0	1	1	0	1	1
9q21.12-q21.13	72956698	73845777	0.88908	55% (16/29)	0.00266533	7	ENSG00000083067[TRPM3], ENSG00000198100[--], ENSG00000176564[C9orf63], ENSG00000135048[TMEM2], ENSG00000107362[C9orf77], ENSG00000155621[C9orf85], ENSG00000200922[Y],	0		0		1	1	0	0	0	0	1	1	1	1	1	0	1	1	0	1	0	0	0	1	0	1	1	0	0	1	1	0	1
9q21.13	75281908	76562458	1.28055	62% (18/29)	0.00266533	3	ENSG00000198963[RORB], ENSG00000119121[TRPM6], ENSG00000211082[--],	0		0		1	1	0	1	0	1	1	1	1	1	1	0	1	1	0	1	0	0	1	1	0	1	1	0	0	1	0	0	1
9q31.1-q31.2	106951789	107777706	0.825918	52% (15/29)	0.00533067	7	ENSG00000070214[SLC44A1], ENSG00000106701[FSD1L], ENSG00000106692[FCMD], ENSG00000204233[--], ENSG00000204232[Q86UW0_HUMAN], ENSG00000186051[TAL2], ENSG00000095209[TMEM38B],	0		0		1	1	1	0	0	1	1	0	0	1	1	0	1	1	0	1	0	0	0	1	0	0	1	0	0	1	1	0	1
10p13	15917593	17007248	1.08966	48% (14/29)	0.00533067	10	ENSG00000209429[--], ENSG00000209435[--], ENSG00000201260[U6], ENSG00000148481[C10orf97], ENSG00000201083[U2], ENSG00000204942[--], ENSG00000165983[PTER], ENSG00000165985[C1QL3], ENSG00000148484[RSU1], ENSG00000107611[CUBN],	0		0		1	1	0	1	0	1	1	0	0	1	1	0	1	0	1	1	0	0	0	0	1	0	1	0	0	0	0	1	1
10p12.2	22854210	23744923	0.890714	48% (14/29)	0.00533067	12	ENSG00000148450[MSRB2], ENSG00000180153[--], ENSG00000168267[PTF1A], ENSG00000204566[C10orf115], ENSG00000179133[C10orf67], ENSG00000209517[--], ENSG00000209527[--], ENSG00000209509[--], ENSG00000202418[U4], ENSG00000206842[U6], ENSG00000150867[PIP5K2A], ENSG00000165309[ARMC3],	0		0		0	1	0	1	0	1	1	0	0	1	0	0	1	0	0	1	1	0	0	0	1	1	1	0	0	0	1	1	1
10q21.1	57203760	58367659	1.1639	59% (17/29)	0.00533067	1	ENSG00000122952[ZWINT],	1	ENSG00000122952[ZWINT],	0		1	1	0	1	1	0	1	0	0	1	1	0	0	0	1	1	1	0	1	0	1	1	1	1	0	1	0	1	0
10q21.3	64846281	66342495	1.49622	69% (20/29)	0.00266533	1	ENSG00000165476[REEP3],	0		0		1	1	0	1	1	1	1	0	0	1	1	1	1	0	1	1	1	0	1	0	1	1	1	1	0	0	0	1	1
10q22.1	73316160	74391172	1.07501	69% (20/29)	0.00266533	16	ENSG00000122863[CHST3], ENSG00000107742[SPOCK2], ENSG00000138303[ASCC1], ENSG00000166295[C10orf104], ENSG00000168209[DDIT4], ENSG00000148719[DNAJB12], ENSG00000107745[CBARA1], ENSG00000210314[--], ENSG00000156026[CCDC109A], ENSG00000201881[Y], ENSG00000138315[OIT3], ENSG00000138308[PLA2G12B], ENSG00000210301[--], ENSG00000202513[U6], ENSG00000200170[Y], ENSG00000200294[snoMBI-87],	0		0		1	0	0	1	1	1	1	0	0	1	1	1	1	0	1	1	1	1	1	0	1	1	0	1	0	1	1	1	0
10q22.1-q22.2	74391172	75333936	0.942765	52% (15/29)	0.00533067	27	ENSG00000166317[SYNPO2L], ENSG00000172650[CTGLF2], ENSG00000176986[SEC24C], ENSG00000196968[FUT11], ENSG00000172586[CHCHD1], ENSG00000166507[NDST2], ENSG00000148660[CAMK2G], ENSG00000210373[--], ENSG00000207473[Y], ENSG00000122884[P4HA1], ENSG00000166321[NUDT13], ENSG00000210361[--], ENSG00000122882[ECD], ENSG00000138286[KIAA0974], ENSG00000200356[U6], ENSG00000182180[DNAJC9], ENSG00000199201[Y],…	3	ENSG00000176986[SEC24C], ENSG00000122884[P4HA1], ENSG00000166348[USP54],	0		0	0	0	0	1	1	1	0	0	1	0	0	1	0	1	1	1	0	1	0	1	1	0	1	0	0	1	1	1
10q22.2	75333936	76299818	0.965883	66% (19/29)	0.00266533	7	ENSG00000176357[C10orf55], ENSG00000122861[PLAU], ENSG00000035403[VCL], ENSG00000185009[AP3M1], ENSG00000156110[ADK], ENSG00000206756[Y], ENSG00000156650[MYST4],	1	ENSG00000122861[PLAU],	0		0	0	0	1	1	1	1	0	0	1	1	1	1	0	1	1	1	0	1	0	1	1	1	1	0	0	1	1	1
10q24.32	103075332	103271952	0.196621	62% (18/29)	0.00266533	3	ENSG00000166167[BTRC], ENSG00000210922[--], ENSG00000206594[U2],	0		0		0	0	0	1	0	1	1	0	0	1	1	1	1	0	1	1	1	1	1	0	1	0	0	1	1	1	1	1	0
11p14.3	23459261	24995116	1.53586	62% (18/29)	0.00266533	3	ENSG00000209584[--], ENSG00000207252[Y], ENSG00000187398[LUZP2],	0		0		1	1	0	0	0	1	1	0	1	1	1	1	1	0	1	1	0	1	1	0	1	1	1	1	0	0	0	0	1
11p14.3-p14.2	25917470	26799846	0.882377	62% (18/29)	0.00266533	3	ENSG00000134343[TMEM16C], ENSG00000169550[MUC15], ENSG00000148942[SLC5A12],	0		0		1	1	0	0	0	1	1	0	1	1	1	1	1	0	1	0	1	1	1	0	1	1	1	1	1	0	0	0	0
11p12	38171500	39449214	1.27771	59% (17/29)	0.00533067	1	ENSG00000201591[U6],	0		0		1	1	0	1	0	0	1	0	1	1	1	1	1	0	1	0	1	0	1	1	1	1	1	0	1	0	0	0	0
11q14.1	83967229	85056718	1.08949	59% (17/29)	0.00533067	7	ENSG00000150672[DLG2], ENSG00000210594[--], ENSG00000210598[--], ENSG00000206583[U6], ENSG00000171204[TMEM126B], ENSG00000171202[TMEM126A], ENSG00000137504[ZHANG_HUMAN],	0		0		0	0	0	1	0	1	1	0	0	1	0	0	1	0	1	1	1	1	1	1	1	0	1	1	1	1	1	0	0
11q21-q22.1	95929173	96716530	0.787358	66% (19/29)	0.00266533	0		0		0		1	1	0	1	0	1	1	0	1	1	0	1	1	0	1	0	1	1	1	1	1	0	1	1	1	0	1	0	0
12p12.3	16484476	17687995	1.20352	62% (18/29)	0.00266533	2	ENSG00000048540[LMO3], ENSG00000209532[--],	0		0		0	1	0	1	1	1	1	0	1	1	0	1	0	1	0	0	1	1	1	1	1	1	0	0	1	1	0	0	1
12p12.1	21667017	23138292	1.47128	55% (16/29)	0.007996	9	ENSG00000111716[LDHB], ENSG00000121361[KCNJ8], ENSG00000069431[ABCC9], ENSG00000111726[CMAS], ENSG00000209595[--], ENSG00000111728[ST8SIA1], ENSG00000111731[KIAA0528], ENSG00000139163[ETNK1], ENSG00000205721[Q6ZWJ2_HUMAN],	0		1	ENSG00000069431[ABCC9],	0	0	0	1	1	0	0	0	1	0	0	1	1	0	1	0	1	1	1	0	1	1	1	0	1	1	1	0	1
12p12.1	24543120	25421431	0.878312	55% (16/29)	0.007996	8	ENSG00000197503[NP_653268.1], ENSG00000200504[SRP_euk_arch], ENSG00000060982[BCAT1], ENSG00000205711[Q6ZV92_HUMAN], ENSG00000118308[LRMP], ENSG00000118307[CASC1], ENSG00000205707[NP_001001660.1], ENSG00000133703[KRAS],	0		0		0	0	0	1	0	0	0	0	1	0	0	1	1	0	1	0	1	1	1	0	1	1	1	1	1	1	1	1	0
12p12.1	25421431	26150226	0.728796	52% (15/29)	0.007996	7	ENSG00000201439[U4], ENSG00000209619[--], ENSG00000152936[NP_689803.1], ENSG00000209624[--], ENSG00000209626[--], ENSG00000205706[--], ENSG00000123094[RASSF8],	0		0		0	0	0	1	0	0	0	0	1	0	0	1	1	0	1	0	1	1	1	0	0	1	1	1	1	1	0	1	1
12p12.1-p11.23	26150226	27452305	1.30208	55% (16/29)	0.007996	13	ENSG00000123095[BHLHB3], ENSG00000123096[SSPN], ENSG00000123104[ITPR2], ENSG00000209628[--], ENSG00000209632[--], ENSG00000209635[--], ENSG00000209639[--], ENSG00000064102[C12orf11], ENSG00000111790[FGFR1OP2], ENSG00000064115[TM7SF3], ENSG00000152944[SURB7], ENSG00000211455[STK38L], ENSG00000029153[ARNTL2],	2	ENSG00000064102[C12orf11], ENSG00000029153[ARNTL2],	0		0	0	0	1	1	0	0	0	1	0	0	1	1	1	1	0	1	1	1	0	0	0	1	1	1	1	1	0	1
12p11.23-p11.22	27452305	28509001	1.0567	52% (15/29)	0.007996	12	ENSG00000029153[ARNTL2], ENSG00000165935[--], ENSG00000110841[PPFIBP1], ENSG00000174236[NP_001025045.1], ENSG00000061794[MRPS35], ENSG00000209643[--], ENSG00000205693[--], ENSG00000087448[KLHDC5], ENSG00000201612[7SK], ENSG00000087494[PTHLH], ENSG00000123106[CCDC91], ENSG00000201191[U4],	1	ENSG00000029153[ARNTL2],	0		0	0	0	1	1	0	0	0	1	0	0	1	1	1	0	0	1	1	1	0	1	0	1	1	1	1	0	0	1
12p11.22-p11.21	30026039	30656823	0.630785	52% (15/29)	0.007996	1	ENSG00000209671[--],	0		0		0	0	0	1	1	0	0	0	1	0	0	1	1	0	0	0	1	1	1	0	1	0	1	1	1	1	1	0	1
12q12	37346998	38237769	0.890772	48% (14/29)	0.007996	3	ENSG00000139117[CPNE8], ENSG00000139116[KIF21A], ENSG00000173208[ABCD2],	0		0		0	0	0	1	1	1	0	0	1	1	0	1	1	0	0	0	1	1	1	0	1	0	0	1	1	0	0	0	1
13q21.33	69812790	70766166	0.953377	62% (18/29)	0.00533067	1	ENSG00000202433[U6],	0		0		1	1	0	1	0	1	1	1	1	1	1	1	1	1	1	0	0	0	1	1	0	1	1	0	1	0	0	0	0
13q31.2	87443748	88258546	0.814799	55% (16/29)	0.007996	0		0		0		1	1	0	1	1	0	1	1	1	1	1	0	1	1	1	0	0	0	0	1	0	1	1	0	1	0	0	0	0
14q11.2	19649892	20071919	0.422028	55% (16/29)	0.00533067	21	ENSG00000200225[5S_rRNA], ENSG00000209386[--], ENSG00000176230[OR4K17], ENSG00000184394[OR4N5], ENSG00000196832[OR11G2], ENSG00000176219[OR11H6], ENSG00000176213[Q8NGC8_HUMAN], ENSG00000176198[OR11H4], ENSG00000136319[TTC5], ENSG00000100814[CCNB1IP1], ENSG00000129484[PARP2], ENSG00000129566[TEP1], ENSG00000185271[123103], ENSG00000092094[OSGEP], ENSG00000100823[APEX1], ENSG00000165782[TMEM55B], E…	0		0		1	0	0	0	1	1	1	0	1	1	1	1	1	0	0	0	1	0	0	1	1	0	1	0	1	0	0	1	1
14q12	28035541	28917623	0.882083	72% (21/29)	0.00266533	4	ENSG00000176165[FOXG1B], ENSG00000186960[Q86U37_HUMAN], ENSG00000207164[Y], ENSG00000209481[--],	0		0		1	1	0	0	0	1	1	0	1	1	1	1	1	0	1	0	1	1	1	1	1	1	1	0	1	1	0	1	1
14q21.1	39968249	40945266	0.977018	66% (19/29)	0.00266533	0		0		0		1	1	0	1	0	1	1	0	1	1	1	1	1	0	0	0	1	0	0	1	1	1	1	0	1	1	0	1	1
14q21.1-q21.2	40945266	41755671	0.810406	69% (20/29)	0.00266533	1	ENSG00000165379[LRFN5],	0		0		1	1	0	1	1	1	1	1	1	1	1	1	1	0	0	0	0	0	1	1	1	1	1	0	1	0	0	1	1
14q21.2-q21.3	42727569	43673313	0.945745	72% (21/29)	0.00266533	1	ENSG00000205898[--],	0		0		1	1	0	1	1	1	1	1	1	1	1	1	1	0	1	0	1	0	1	1	1	0	1	0	1	0	0	1	1
15q14	32437506	33877278	1.43977	62% (18/29)	0.00266533	16	ENSG00000175265[GOLGA8A], ENSG00000206095[--], ENSG00000206092[--], ENSG00000159248[CXA9_HUMAN], ENSG00000159251[ACTC1], ENSG00000021776[AQR], ENSG00000198146[ZNF770], ENSG00000197817[Q9UHS9_HUMAN], ENSG00000179437[NANOGP8], ENSG00000179315[649163], ENSG00000206085[Q6ZRJ0_HUMAN], ENSG00000134146[ATPBD4], ENSG00000198147[--], ENSG00000176454[AGPAT7], ENSG00000196430[--], ENSG00000201904[snoACA18],	1	ENSG00000198146[ZNF770],	0		1	0	1	0	0	1	1	0	0	1	0	1	1	1	0	1	1	1	1	0	0	0	1	1	1	0	1	1	1
15q14	33877278	35301934	1.42466	59% (17/29)	0.00266533	7	ENSG00000140209[--], ENSG00000186073[NP_115888.1], ENSG00000178351[Q8N345_HUMAN], ENSG00000134138[MEIS2], ENSG00000210354[--], ENSG00000206676[Y], ENSG00000210360[--],	0		0		1	1	1	0	0	0	1	0	1	1	1	1	1	1	0	1	0	0	1	0	0	0	1	1	1	0	1	0	1
15q21.3	51133648	53110642	1.977	55% (16/29)	0.007996	6	ENSG00000206641[U6], ENSG00000210932[--], ENSG00000205556[Q6ZTA2_HUMAN], ENSG00000205555[Q6ZT32_HUMAN], ENSG00000137766[UNC13C], ENSG00000166415[WDR72],	0		0		1	1	1	0	0	0	1	0	1	1	1	1	1	1	0	1	0	0	1	0	0	0	1	1	1	0	0	1	0
15q24.2-q24.3	73717297	74920239	1.20294	55% (16/29)	0.007996	20	ENSG00000201510[7SK], ENSG00000209250[--], ENSG00000201630[U4], ENSG00000177971[IMP3], ENSG00000173548[SH3PX3], ENSG00000173546[CSPG4], ENSG00000198165[Q9H960_HUMAN], ENSG00000182950[ODF3L1], ENSG00000209299[--], ENSG00000177843[Q96T57_HUMAN], ENSG00000177672[--], ENSG00000187812[--], ENSG00000167141[--], ENSG00000140367[UBE2Q2], ENSG00000167196[FBXO22], ENSG00000169752[NRG4], ENSG00000169758[C15…	0		0		1	1	1	0	0	1	1	0	1	1	1	0	1	0	0	1	0	0	1	0	0	0	1	1	1	0	0	1	1
15q26.3	99194139	99788015	0.593877	66% (19/29)	0.00266533	7	ENSG00000205136[NP_001032301.1], ENSG00000184254[ALDH1A3], ENSG00000154237[LRRK1], ENSG00000131873[CHSY1], ENSG00000131871[SELS_HUMAN], ENSG00000131876[SNRPA1], ENSG00000140479[PCSK6],	3	ENSG00000131871[SELS_HUMAN], ENSG00000131876[SNRPA1], ENSG00000140479[PCSK6],	0		1	0	0	0	1	1	1	1	0	1	1	0	0	1	1	1	1	1	0	0	1	0	1	1	1	1	0	1	1
16p13.3	431407	716119	0.284713	59% (17/29)	0.00533067	23	ENSG00000090565[RAB11FIP3], ENSG00000103326[SOLH], ENSG00000161992[NP_788850.1], ENSG00000007541[PIGQ], ENSG00000197562[RAB40C], ENSG00000127578[WFIKKN1], ENSG00000130731[NP_001035251.1], ENSG00000172366[C16orf14], ENSG00000161996[Q96S18_HUMAN], ENSG00000161998[Q8N221_HUMAN], ENSG00000140983[RHOT2], ENSG00000103269[RHBDL1], ENSG00000103266[STUB1], ENSG00000161999[NP_001005920.2], ENSG00000127580[…	0		0		0	0	1	0	1	1	1	0	1	0	0	1	1	0	1	1	1	1	1	1	0	1	0	1	0	1	1	0	0
16p13.3	3703633	4253033	0.549401	76% (22/29)	0.00266533	5	ENSG00000126602[TRAP1], ENSG00000005339[CREBBP], ENSG00000162104[ADCY9], ENSG00000185739[SRL], ENSG00000090447[TFAP4],	1	ENSG00000090447[TFAP4],	1	ENSG00000126602[TRAP1],	1	0	1	1	1	1	0	1	1	1	1	1	0	0	1	1	1	1	0	1	0	1	1	0	1	1	1	1	1
16p13.13	11905583	12263509	0.357927	79% (23/29)	0.00266533	7	ENSG00000103342[GSPT1], ENSG00000048462[TNFRSF17], ENSG00000122309[Q13808_HUMAN], ENSG00000140660[RUNDC2A], ENSG00000048471[Q8TEQ0_HUMAN], ENSG00000175604[Q96M66_HUMAN], ENSG00000205782[Q6ZT39_HUMAN],	0		0		0	0	0	1	1	1	1	1	1	1	1	1	1	1	1	0	1	1	1	0	1	1	1	1	1	1	1	0	1
16p11.2	28085248	29588307	1.50306	59% (17/29)	0.007996	48	ENSG00000209898[--], ENSG00000200307[snoACA43], ENSG00000209903[--], ENSG00000200652[snoACA25], ENSG00000198244[Q8IVM4_HUMAN], ENSG00000188322[SBK1], ENSG00000196877[NP_001018132.1], ENSG00000205609[Q9BW98_HUMAN], ENSG00000209886[--], ENSG00000178952[TUFM], ENSG00000178188[SH2B1], ENSG00000196296[ATP2A1], ENSG00000196585[390688], ENSG00000198156[NP_001018132.1], ENSG00000188603[CLN3], ENSG0000017…	4	ENSG00000178952[TUFM], ENSG00000181625[SULT1A4], ENSG00000169203[NR_002603.1], ENSG00000197471[SPN],	1	ENSG00000168488[ATXN2L],	0	0	0	1	1	1	1	0	1	0	0	1	0	1	1	1	1	1	0	0	1	1	0	1	0	0	1	1	1
16q21	58588699	59680956	1.09226	59% (17/29)	0.007996	1	ENSG00000180019[--],	0		0		1	0	0	1	0	1	1	1	1	1	1	1	1	1	0	0	0	1	1	1	0	0	1	0	0	1	0	0	1
16q21	60834756	62160761	1.32601	55% (16/29)	0.007996	0		0		0		1	1	0	1	0	1	1	1	1	1	1	1	1	1	0	0	0	0	1	1	0	0	1	0	0	1	0	0	0
16q22.1	67951790	68772637	0.820848	62% (18/29)	0.007996	14	ENSG00000210659[--], ENSG00000157335[NP_775890.2], ENSG00000210656[--], ENSG00000132604[TERF2], ENSG00000210650[--], ENSG00000103018[CYB5B], ENSG00000102908[NFAT5], ENSG00000181019[NQO1], ENSG00000141101[NOB1], ENSG00000198373[WWP2], ENSG00000157322[NP_872425.1], ENSG00000196696[Q6P474_HUMAN], ENSG00000090857[NP_060460.3], ENSG00000208017[hsa-mir-140],	1	ENSG00000181019[NQO1],	0		0	0	1	1	1	1	1	1	1	1	0	1	1	1	0	1	0	1	1	1	0	1	0	0	0	1	1	0	0
16q22.3	69838272	70547795	0.709524	62% (18/29)	0.007996	15	ENSG00000140835[CHST4], ENSG00000198650[TAT], ENSG00000207471[U70], ENSG00000199301[U6], ENSG00000140832[MARVELD3], ENSG00000040199[PHLPPL], ENSG00000205112[Q6UXR9_HUMAN], ENSG00000166747[AP1G1], ENSG00000102984[NP_060000.1], ENSG00000182149[KIAA0174], ENSG00000187008[PKD1L3], ENSG00000180917[NP_060818.3], ENSG00000172137[CALB2], ENSG00000167377[ZNF23], ENSG00000157429[ZNF19],	0		1	ENSG00000166747[AP1G1],	0	0	0	1	0	1	1	1	1	0	0	1	0	1	0	1	1	1	1	1	1	1	0	0	0	1	1	1	1
17q21.32	42603476	43500471	0.896996	59% (17/29)	0.00266533	23	ENSG00000004897[CDC27], ENSG00000198336[MYL4], ENSG00000056345[ITGB3], ENSG00000178852[C17orf57], ENSG00000141279[NPEPPS], ENSG00000206734[Y], ENSG00000108424[KPNB1], ENSG00000198933[TBKBP1], ENSG00000073861[TBX21], ENSG00000210713[--], ENSG00000006025[OSBPL7], ENSG00000159111[MRPL10], ENSG00000141294[LRRC46], ENSG00000141295[SCRN2], ENSG00000189120[SP6], ENSG00000198437[Q8N0T2_HUMAN], ENSG000001…	1	ENSG00000082641[NFE2L1],	0		0	0	1	1	1	1	1	1	0	1	0	0	0	0	1	1	1	1	0	0	1	1	0	1	1	0	0	1	1
17q22.1	48575206	48874340	0.299135	66% (19/29)	0.00266533	0		0		0		1	1	0	1	0	1	1	0	1	1	1	0	1	1	1	0	1	1	1	1	0	0	1	1	1	0	0	1	0
17q23.2	57099676	57700512	0.600837	55% (16/29)	0.00266533	8	ENSG00000136492[BRIP1], ENSG00000108506[INTS2], ENSG00000202361[Y], ENSG00000108510[THRAP1], ENSG00000211085[--], ENSG00000200842[Y], ENSG00000207123[Y], ENSG00000188755[--],	0		0		0	0	1	1	0	1	1	0	1	0	1	0	0	0	1	0	1	1	1	0	1	1	0	1	1	0	1	1	0
18p11.32	645198	1339300	0.694103	48% (14/29)	0.00533067	8	ENSG00000206687[U1], ENSG00000199197[7SK], ENSG00000176912[NP_001012734.1], ENSG00000176890[TYMS], ENSG00000132199[ENOSF1], ENSG00000176105[YES1], ENSG00000141433[ADCYAP1], ENSG00000132204[Q9BZP3_HUMAN],	2	ENSG00000176890[TYMS], ENSG00000132199[ENOSF1],	0		0	0	1	1	1	1	1	0	1	1	1	1	0	0	0	1	0	0	0	1	0	0	0	1	0	0	1	0	1
18q11.1-q11.2	17281353	17753073	0.471721	48% (14/29)	0.00533067	12	ENSG00000141449[KIAA1772], ENSG00000141446[ESCO1], ENSG00000167088[SNRPD1], ENSG00000158201[ABHD3], ENSG00000101752[MIB1], ENSG00000199977[U17], ENSG00000209719[--], ENSG00000206953[U6], ENSG00000209057[--], ENSG00000200750[Y], ENSG00000207694[hsa-mir-1-2], ENSG00000207786[hsa-mir-133a-1],	0		0		0	0	1	0	1	1	1	1	1	1	1	0	0	0	1	1	0	0	0	0	0	1	0	0	0	1	1	0	1
19q13.43	61736091	62953519	1.21743	59% (17/29)	0.00266533	40	ENSG00000196867[ZFP28], ENSG00000197016[ZNF470], ENSG00000197951[ZNF71], ENSG00000127903[NP_001005850.1], ENSG00000198300[ZIM2], ENSG00000203304[--], ENSG00000203303[--], ENSG00000210698[--], ENSG00000210699[--], ENSG00000210700[--], ENSG00000131864[USP29], ENSG00000210701[--], ENSG00000141946[ZIM3], ENSG00000204527[DUXA], ENSG00000083844[ZNF264], ENSG00000105146[AURKC], ENSG00000204524[NP_001018…	2	ENSG00000198300[ZIM2], ENSG00000121417[ZNF211],	0		1	0	1	1	1	1	1	1	1	1	1	1	0	1	0	0	0	1	0	1	0	1	1	1	0	0	0	0	0
20q11.21-q11.22	31402713	32106257	0.703545	83% (24/29)	0.00266533	14	ENSG00000131062[Q9H4V4_HUMAN], ENSG00000101391[CDK5RAP1], ENSG00000203434[--], ENSG00000101400[SNTA1], ENSG00000078699[CBFA2T2], ENSG00000125967[APBA2BP], ENSG00000149609[C20orf144], ENSG00000182584[C20orf134], ENSG00000101412[E2F1], ENSG00000101417[PXMP4], ENSG00000131061[ZNF341], ENSG00000101421[CHMP4B], ENSG00000204317[Q6ZW02_HUMAN], ENSG00000125970[RALY],	0		0		0	1	1	1	0	1	1	0	1	1	0	1	1	1	1	1	1	1	1	1	1	1	0	1	1	1	1	1	1
20q11.22	32106257	32792677	0.686421	62% (18/29)	0.007996	16	ENSG00000206582[Y], ENSG00000210131[--], ENSG00000125977[EIF2S2], ENSG00000181256[XR_001008.1], ENSG00000101440[ASIP], ENSG00000101444[AHCY], ENSG00000078747[ITCH], ENSG00000201498[Y], ENSG00000181741[--], ENSG00000125971[DYNLRB1], ENSG00000101460[MAP1LC3A], ENSG00000101464[CDC91L1], ENSG00000078804[TP53INP2], ENSG00000198646[NCOA6], ENSG00000125970[RALY], ENSG00000207997[hsa-mir-644],	1	ENSG00000198646[NCOA6],	0		0	0	1	0	0	0	0	1	1	0	0	1	0	0	1	1	1	1	1	1	1	1	0	1	1	1	1	1	1
21q21.1	21231623	21783540	0.551918	59% (17/29)	0.00533067	1	ENSG00000154654[NCAM2],	0		0		1	0	0	1	1	1	1	1	1	1	1	1	1	1	0	0	0	0	1	0	0	0	1	0	0	1	0	1	1
21q21.2	24540179	25065401	0.525223	55% (16/29)	0.00533067	1	ENSG00000197382[Q6ZVR1_HUMAN],	0		0		1	1	0	1	0	0	1	1	1	1	1	1	1	1	0	0	0	0	1	0	0	0	1	0	0	1	0	1	1
Xq21.1	77744782	78868172	1.12339	72% (21/29)	0.00266533	6	ENSG00000179300[ZCCHC5], ENSG00000147145[GPR23], ENSG00000078589[P2RY10], ENSG00000204102[--], ENSG00000147138[GPR174], ENSG00000078596[ITM2A],	0		0		1	1	1	1	1	1	1	0	0	1	1	0	1	1	1	1	1	0	0	0	1	1	1	1	0	1	0	1	1
Xq21.2-q21.31	85863828	86529701	0.665874	69% (20/29)	0.00266533	2	ENSG00000126733[DACH2], ENSG00000200422[U45],	0		0		1	1	1	0	0	1	1	0	0	1	1	0	1	0	1	1	1	1	1	0	1	0	1	1	1	1	0	1	1
Xq21.33-q22.1	98033738	99289286	1.25555	69% (20/29)	0.00266533	1	ENSG00000201893[snoACA25],	0		0		1	1	1	0	0	1	1	0	0	1	1	0	1	1	1	1	1	1	0	0	1	1	1	1	0	1	0	1	1
aGenes (total number and symbol) included in each MCR
bGenes whose transcript levels in PDAC or PanIN are consistent with their DNA copy number status identified in array CGH
cMCR output in each tumour sample. 1; genetic gain, 0; no copy number change
