# Supplementary material
Source: publisher figshare collection journal article supplement (https://karger.figshare.com/articles/dataset/_/5442418)
Supplement: Supplementary file 3 [file 1 › Tab3.xls]

## Sheet: Suppl Table 3
Supplementary Table 3. Minimal common regions (MCRs) of non-random genetic losses in PDAC
Cytoband	Start (bp)	End (bp)	Size (Mb)	Frequency	P value	MCRa		PDACb		PanINb		MCR outputc
						No.	Genes included	No.	Genes	No.	Genes	PC1	PC2	PC3	PC4	PC5	PC6	PC7	PC8	PC9	PC10	PC11	PC12	PC13	PC14	PC15	PC16	PC17	PC18	PC19	PC20	PC34	PC35	PC36	Panc1	PaTu1	MiaPaCa2	SUIT2	Cfpac1	RWP1
1p36.32	3913633	5229374	1.31574	69% (20/29)	0.007996	1	ENSG00000196581[AJAP1],	0		0		1	1	0	1	1	1	1	1	1	1	0	1	1	0	0	1	1	0	1	0	1	1	1	0	1	1	0	0	1
1p36.32-p36.31	5229374	6509870	1.2805	62% (18/29)	0.007996	16	ENSG00000131697[NPHP4], ENSG00000069424[KCNAB2], ENSG00000116254[CHD5], ENSG00000116251[RPL22], ENSG00000189429[RNF207], ENSG00000158286[C1orf188], ENSG00000116237[ICMT], ENSG00000181563[C1orf211], ENSG00000173673[HES3], ENSG00000158292[GPR153], ENSG00000097021[ACOT7], ENSG00000204902[Q6UXW7_HUMAN], ENSG00000069812[HES2], ENSG00000187017[ESPN], ENSG00000171680[TNFRSF25], ENSG00000162408[NOL9],	0		0		1	0	0	1	1	1	1	1	1	1	0	1	1	0	0	1	1	0	1	0	1	1	1	0	1	0	0	0	1
1p36.23	8379388	9142502	0.763115	79% (23/29)	0.00266533	12	ENSG00000142599[RERE], ENSG00000209385[--], ENSG00000074800[ENO1], ENSG00000201725[U6], ENSG00000183445[148915], ENSG00000131686[CA6], ENSG00000209032[--], ENSG00000197241[SLC2A7], ENSG00000142583[SLC2A5], ENSG00000207469[snoACA47], ENSG00000180758[GPR157], ENSG00000207865[hsa-mir-34a],	1	ENSG00000142599[RERE],	1	ENSG00000142599[RERE],	1	1	0	1	1	1	1	1	1	1	1	1	1	1	0	1	1	0	1	1	1	1	1	0	1	1	0	0	1
1p36.23-p36.22	9142502	9661749	0.519248	66% (19/29)	0.007996	8	ENSG00000204772[Q6ZWG2_HUMAN], ENSG00000049239[H6PD], ENSG00000171621[SPSB1], ENSG00000209395[--], ENSG00000171612[NP_115691.1], ENSG00000188807[NP_001010866.1], ENSG00000171608[PIK3CD], ENSG00000179840[NP_001038943.1],	2	ENSG00000049239[H6PD], ENSG00000171608[PIK3CD],	1	ENSG00000049239[H6PD],	1	1	0	1	0	1	1	1	1	1	1	1	1	0	0	0	1	0	1	1	1	0	1	0	1	1	0	0	1
1p36.22	11296895	11700048	0.403154	66% (19/29)	0.007996	6	ENSG00000204624[PTCHD2], ENSG00000116661[FBXO2], ENSG00000132879[FBXO44], ENSG00000116663[FBXO6], ENSG00000116670[MAD2L2], ENSG00000162490[C1orf187],	0		0		1	0	0	1	1	1	1	1	1	1	1	1	1	0	0	1	1	0	1	0	1	1	1	0	1	0	0	0	1
1p36.13	16990962	17780550	0.789589	72% (21/29)	0.00266533	17	ENSG00000058453[CROCC], ENSG00000209540[--], ENSG00000209545[--], ENSG00000196690[--], ENSG00000199554[U1], ENSG00000207005[U1], ENSG00000117122[MFAP2], ENSG00000159363[ATP13A2], ENSG00000117118[SDHB], ENSG00000117115[PADI2], ENSG00000204362[Q6ZS05_HUMAN], ENSG00000142623[PADI1], ENSG00000142619[PADI3], ENSG00000159339[PADI4], ENSG00000197996[PADI6], ENSG00000179051[RCC2], ENSG00000074964[ARHGEF1…	0		0		1	1	0	1	0	1	1	1	1	1	1	0	1	0	1	1	1	0	1	0	1	1	1	0	1	1	1	0	1
1p36.13	17780550	18767187	0.986638	86% (25/29)	0.00266533	5	ENSG00000074964[ARHGEF10L], ENSG00000117148[ACTL8], ENSG00000117154[IGSF21], ENSG00000179023[KLHDC7A], ENSG00000124854[--],	1	ENSG00000117148[ACTL8],	0		1	0	1	1	1	1	1	1	1	1	1	1	1	1	1	1	1	1	0	0	1	1	1	1	1	1	1	0	1
1p36.13	18767187	19870518	1.10333	83% (24/29)	0.00266533	22	ENSG00000009709[PAX7], ENSG00000179002[TAS1R2], ENSG00000159423[ALDH4A1], ENSG00000169991[Q5TF58_HUMAN], ENSG00000127481[ZUBR1], ENSG00000127463[KIAA0090], ENSG00000053372[C1orf33], ENSG00000211454[ARK74_HUMAN], ENSG00000188838[NP_957704.1], ENSG00000162482[AKR7A3], ENSG00000196124[Q8TCH7_HUMAN], ENSG00000053371[AKR7A2], ENSG00000200403[U6], ENSG00000040487[PQLC2], ENSG00000077549[CAPZB], ENSG000…	1	ENSG00000127481[ZUBR1],	1	ENSG00000127481[ZUBR1],	1	1	0	1	0	1	1	1	1	1	1	1	1	1	1	1	1	1	1	1	1	0	1	0	1	1	1	0	1
1p36.13-p36.12	19870518	21264484	1.39397	79% (23/29)	0.00266533	23	ENSG00000158748[HTR6], ENSG00000162542[TMCO4], ENSG00000178828[RNF186], ENSG00000169914[OTUD3], ENSG00000188784[PLA2G2E], ENSG00000209591[--], ENSG00000188257[PLA2G2A], ENSG00000127472[PLA2G5], ENSG00000117215[PLA2G2D], ENSG00000158786[PLA2G2F], ENSG00000187980[Q5R387_HUMAN], ENSG00000162543[UBXD3], ENSG00000158816[NP_001034589.1], ENSG00000162545[CAMK2N1], ENSG00000090432[C1orf166], ENSG00000183…	1	ENSG00000117242[DDOST],	0		1	0	1	1	0	1	1	1	1	1	1	0	1	1	1	1	1	1	1	0	1	1	1	0	1	1	1	0	1
1p36.11	23881482	24596143	0.714662	76% (22/29)	0.00266533	16	ENSG00000142676[RPL11], ENSG00000209640[--], ENSG00000011007[TCEB3], ENSG00000057757[C1orf128], ENSG00000011009[LYPLA2], ENSG00000117308[GALE], ENSG00000117305[HMGCL], ENSG00000179163[FUCA1], ENSG00000188822[CNR2], ENSG00000189266[PNRC2], ENSG00000188529[FUSIP1], ENSG00000142661[MYOM3], ENSG00000142677[IL22RA1], ENSG00000185436[IL28RA], ENSG00000158055[GRHL3], ENSG00000001460[C1orf201],	1	ENSG00000057757[C1orf128],	0		1	1	0	1	0	1	1	1	1	1	1	1	1	1	1	0	1	1	1	0	1	0	1	0	1	1	1	0	1
1p36.11	24596143	24901021	0.304879	59% (17/29)	0.007996	7	ENSG00000001460[C1orf201], ENSG00000001461[NPAL3], ENSG00000117602[DSCR1L2], ENSG00000184454[C1orf130], ENSG00000209650[--], ENSG00000133226[SRRM1], ENSG00000209656[--],	0		0		0	0	0	1	0	0	1	1	1	1	1	0	1	1	1	0	1	1	0	0	1	1	1	0	1	1	0	0	1
1p36.11	24901021	26202341	1.30132	72% (21/29)	0.00266533	25	ENSG00000169504[CLIC4], ENSG00000209663[--], ENSG00000020633[RUNX3], ENSG00000117614[SYF2], ENSG00000117616[C1orf63], ENSG00000187010[RHD], ENSG00000183726[TMEM50A], ENSG00000188672[RHCE], ENSG00000204181[651820], ENSG00000204178[TMEM57], ENSG00000157978[LDLRAP1], ENSG00000203342[--], ENSG00000203341[--], ENSG00000117643[MAN1C1], ENSG00000162430[SEPN1], ENSG00000211453[SEPN1_HUMAN], ENSG000001176…	0		0		1	0	0	1	1	1	1	1	1	1	1	1	0	1	1	1	0	1	1	0	1	1	1	0	1	1	0	0	1
1p36.11	26202341	27453508	1.25117	76% (22/29)	0.00266533	40	ENSG00000201222[U91], ENSG00000158008[EXTL1], ENSG00000158014[SLC30A2], ENSG00000158022[TRIM63], ENSG00000175087[PDIK1L], ENSG00000197245[GRRP1], ENSG00000142684[ZNF593], ENSG00000142675[CNKSR1], ENSG00000188782[CATSPER4], ENSG00000130695[CCDC21], ENSG00000209677[--], ENSG00000142669[SH3BGRL3], ENSG00000158062[UBXD5], ENSG00000169442[CD52], ENSG00000176092[AIM1L], ENSG00000176083[ZNF683], ENSG000…	1	ENSG00000131910[NR0B2],	0		1	1	0	1	0	0	1	1	1	1	1	1	0	1	1	1	1	1	1	0	1	1	1	0	1	1	1	0	1
1p36.11-p35.3	27702974	28279739	0.576766	90% (26/29)	0.00266533	19	ENSG00000126705[AHDC1], ENSG00000000938[FGR], ENSG00000186012[CCDC72], ENSG00000126709[IFI6], ENSG00000206767[U6], ENSG00000207095[U6], ENSG00000009780[FAM76A], ENSG00000209738[--], ENSG00000117758[STX12], ENSG00000202203[U6], ENSG00000117751[PPP1R8], ENSG00000209756[SCARNA1], ENSG00000181089[Q9UHS2_HUMAN], ENSG00000130775[C1orf38], ENSG00000117748[RPA2], ENSG00000130768[SMPDL3B], ENSG00000158156…	1	ENSG00000158161[EYA3],	1	ENSG00000158161[EYA3],	1	1	0	1	1	0	1	1	1	1	1	1	1	1	1	1	1	1	1	1	1	1	1	0	1	1	1	1	1
1p35.3	29154418	29949616	0.795199	86% (25/29)	0.00266533	7	ENSG00000159023[EPB41], ENSG00000196272[--], ENSG00000206704[Y], ENSG00000187975[NP_001003682.1], ENSG00000116350[SFRS4], ENSG00000116353[MECR], ENSG00000060656[PTPRU],	0		0		1	1	0	1	1	1	1	1	1	1	1	1	1	1	1	1	1	1	1	0	1	1	1	0	1	1	1	0	1
1p35.3-p35.2	29949616	31202941	1.25333	83% (24/29)	0.00266533	8	ENSG00000162510[MATN1], ENSG00000186056[Q6ZRP8_HUMAN], ENSG00000162511[LAPTM5], ENSG00000199576[7SK], ENSG00000162512[SDC3], ENSG00000134644[PUM1], ENSG00000200154[U103], ENSG00000202107[U103],	0		0		1	1	0	1	1	1	1	1	1	1	1	1	1	1	1	0	1	1	1	0	1	1	1	1	1	0	1	0	1
1p35.2	31202941	32179980	0.97704	76% (22/29)	0.00266533	17	ENSG00000134644[PUM1], ENSG00000200181[snoZ50], ENSG00000186195[Q9UI20_HUMAN], ENSG00000084628[FAM77C], ENSG00000060688[WDR57], ENSG00000121766[ZCCHC17], ENSG00000121769[FABP3], ENSG00000168528[SERINC2], ENSG00000180639[Q9P1L9_HUMAN], ENSG00000206981[U6], ENSG00000142910[TINAGL1], ENSG00000121764[HCRTR1], ENSG00000162517[PEF1], ENSG00000084636[COL16A1], ENSG00000121753[BAI2], ENSG00000134668[SPOC…	0		1	ENSG00000084636[COL16A1],	1	1	0	1	0	1	1	1	1	1	1	1	1	1	1	0	1	1	1	1	1	1	1	0	1	0	0	0	1
1p35.1-p34.3	33581730	34569385	0.987656	72% (21/29)	0.00266533	6	ENSG00000134686[PHC2], ENSG00000121903[ZNF31], ENSG00000121904[CSMD2], ENSG00000176256[HMGB4], ENSG00000201148[5S_rRNA], ENSG00000142698[C1orf94],	0		0		1	0	0	1	1	1	1	1	0	1	1	1	1	0	0	1	1	1	1	0	1	1	1	1	1	1	0	0	1
1p34.3	34569385	35804738	1.23535	79% (23/29)	0.00266533	19	ENSG00000207941[hsa-mir-552], ENSG00000189280[GJB5], ENSG00000189433[GJB4], ENSG00000188910[GJB3], ENSG00000187513[GJA4], ENSG00000163866[C1orf212], ENSG00000116544[DLGAP3], ENSG00000204105[Q7L0L9_HUMAN], ENSG00000163867[ZMYM6], ENSG00000197056[ZMYM1], ENSG00000200915[U4], ENSG00000116560[SFPQ], ENSG00000201868[Y], ENSG00000146463[ZMYM4], ENSG00000209961[--], ENSG00000201542[E2], ENSG00000202129[…	0		1	ENSG00000020129[NCDN],	1	1	0	1	1	1	1	1	1	1	1	1	1	0	0	1	1	1	1	0	1	1	1	1	1	1	0	0	1
1p34.3	36953732	37599763	0.646032	83% (24/29)	0.00266533	3	ENSG00000163873[GRIK3], ENSG00000207328[U6], ENSG00000210044[--],	0		0		1	1	1	1	1	1	1	1	1	1	1	1	1	0	0	1	1	1	1	0	1	1	1	1	1	1	0	0	1
1p34.3	38143717	38830556	0.68684	72% (21/29)	0.00266533	7	ENSG00000204084[INPP5B], ENSG00000183431[SF3A3], ENSG00000210075[--], ENSG00000183386[FHL3], ENSG00000183520[UTP11L], ENSG00000185668[POU3F1], ENSG00000200796[U6],	0		0		1	1	0	1	1	1	1	1	1	1	1	0	1	1	0	1	1	1	1	0	1	1	1	0	1	0	0	0	1
1p34.1	44268667	45000776	0.73211	79% (23/29)	0.00266533	13	ENSG00000196517[SLC6A9], ENSG00000210358[--], ENSG00000171872[KLF17], ENSG00000200171[Y], ENSG00000178028[DMAP1], ENSG00000117419[PRNPIP], ENSG00000199385[U6], ENSG00000187147[C1orf164], ENSG00000126106[TMEM53], ENSG00000198520[NP_001004307.1], ENSG00000199377[U5], ENSG00000200169[U5], ENSG00000142945[KIF2C],	0		0		1	1	0	1	1	1	1	1	1	1	0	1	1	1	0	1	1	1	1	0	1	1	1	1	1	1	0	0	1
1p33	47532872	48556325	1.02345	79% (23/29)	0.00266533	12	ENSG00000123473[STIL], ENSG00000162368[CMPK], ENSG00000186790[FOXE3], ENSG00000186564[FOXD2], ENSG00000180029[Q8NF14_HUMAN], ENSG00000204018[--], ENSG00000204016[388630], ENSG00000204015[--], ENSG00000198709[Q9UI23_HUMAN], ENSG00000117834[SLC5A9], ENSG00000179793[Q9BXZ3_HUMAN], ENSG00000132122[SPATA6],	0		0		1	0	1	1	1	1	1	1	1	1	0	1	1	0	1	1	1	1	1	0	1	1	1	1	1	1	0	0	1
1p32.3	53371440	53750907	0.379468	86% (25/29)	0.00266533	7	ENSG00000162383[SLC1A7], ENSG00000157184[CPT2], ENSG00000162384[C1orf123], ENSG00000162385[MAGOH], ENSG00000157193[LRP8], ENSG00000143006[DMRTB1], ENSG00000174332[GLIS1],	0		0		1	1	1	1	1	1	1	1	1	1	1	1	1	1	0	1	1	1	1	0	1	1	1	1	1	1	0	0	1
1p32.3	53750907	54788971	1.03807	86% (25/29)	0.00266533	21	ENSG00000174332[GLIS1], ENSG00000200268[U7], ENSG00000058804[TMEM48], ENSG00000201003[snoACA58], ENSG00000210686[--], ENSG00000058799[YIPF1], ENSG00000181150[DIO1], ENSG00000211452[IOD1_HUMAN], ENSG00000081870[C1orf41], ENSG00000116212[LRRC42], ENSG00000203985[LDLRAD1], ENSG00000203277[--], ENSG00000116209[TMEM59], ENSG00000203276[--], ENSG00000116205[C1orf83], ENSG00000197773[--], ENSG0000015721…	0		0		1	1	1	1	1	1	1	1	1	1	1	1	1	0	1	1	1	1	1	0	1	1	1	1	1	1	0	0	1
1p13.3	109662726	110421733	0.759008	76% (22/29)	0.00266533	23	ENSG00000134243[SORT1], ENSG00000143106[PSMA5], ENSG00000143028[SYPL2], ENSG00000162650[ATXN7L2], ENSG00000174151[CYB561D1], ENSG00000181754[AMIGO1], ENSG00000156097[GPR61], ENSG00000065135[GNAI3], ENSG00000206832[U6], ENSG00000207709[hsa-mir-197], ENSG00000134183[GNAT2], ENSG00000116337[AMPD2], ENSG00000168765[GSTM4], ENSG00000134184[GSTM1], ENSG00000198861[ENK13_HUMAN], ENSG00000134201[GSTM5], …	1	ENSG00000134201[GSTM5],	0		1	0	0	1	1	1	1	1	1	1	1	1	0	0	1	1	1	1	1	0	1	1	1	1	1	1	0	0	1
1p13.2	111694621	112653686	0.959066	76% (22/29)	0.00266533	15	ENSG00000173947[C1orf88], ENSG00000184488[--], ENSG00000085465[OVGP1], ENSG00000116455[WDR77], ENSG00000199890[Y], ENSG00000116459[ATP5F1], ENSG00000143110[C1orf162], ENSG00000121933[ADORA3], ENSG00000200360[U6], ENSG00000116473[RAP1A], ENSG00000201028[U6], ENSG00000197852[C1orf183], ENSG00000064703[DDX20], ENSG00000171385[KCND3], ENSG00000209265[--],	1	ENSG00000064703[DDX20],	0		1	0	0	1	1	1	1	1	1	1	0	1	1	0	1	1	1	1	1	0	1	1	1	1	1	1	0	0	1
1p13.2	113902673	114772618	0.869946	83% (24/29)	0.00266533	11	ENSG00000081026[MAGI3], ENSG00000116793[PHTF1], ENSG00000134242[PTPN22], ENSG00000081019[RSBN1], ENSG00000188761[C1orf178], ENSG00000134262[AP4B1], ENSG00000118655[DCLRE1B], ENSG00000163349[HIPK1], ENSG00000116774[OLFML3], ENSG00000134207[SYT6], ENSG00000197323[TRIM33],	0		0		1	0	1	1	1	1	1	1	1	1	1	1	1	0	1	1	1	1	1	0	1	1	1	1	1	1	0	0	1
2p25.1	8231235	9165178	0.933944	69% (20/29)	0.00266533	5	ENSG00000198114[C2orf46], ENSG00000115738[ID2], ENSG00000134313[NP_065789.1], ENSG00000143797[MBOAT2], ENSG00000210570[--],	0		0		1	1	0	1	1	1	1	0	0	1	1	0	1	0	0	1	1	1	1	1	1	0	1	1	1	1	0	1	0
2p24.3	16185757	16362618	0.176862	62% (18/29)	0.00266533	1	ENSG00000210770[--],	0		0		1	0	0	1	1	1	1	0	0	1	1	0	0	0	0	1	1	1	1	0	1	1	0	1	1	0	1	1	1
2p23.2	28008899	28924867	0.915969	72% (21/29)	0.00266533	4	ENSG00000158019[BRE], ENSG00000075426[FOSL2], ENSG00000163803[PLB1], ENSG00000163806[SPDYA],	0		0		1	1	1	1	1	1	1	0	0	1	1	0	1	1	0	1	1	1	1	1	1	0	1	0	1	1	0	1	0
2p23.2-p23.1	28924867	30052909	1.12804	55% (16/29)	0.007996	12	ENSG00000163806[SPDYA], ENSG00000171103[NP_060380.2], ENSG00000163811[WDR43], ENSG00000206928[U53], ENSG00000200990[Y], ENSG00000211046[--], ENSG00000200283[Y], ENSG00000189350[NP_954974.1], ENSG00000179270[NP_001025054.1], ENSG00000115295[RSNL2], ENSG00000171094[ALK], ENSG00000211057[--],	0		0		0	1	0	0	1	1	1	0	0	1	1	0	1	0	0	1	1	1	1	1	0	1	0	0	1	1	0	0	1
2p21	44850123	45666281	0.816159	59% (17/29)	0.007996	7	ENSG00000143919[C2orf34], ENSG00000205058[Q6ZT81_HUMAN], ENSG00000138083[SIX3], ENSG00000170577[SIX2], ENSG00000205054[Q6UXP8_HUMAN], ENSG00000068784[SRBD1], ENSG00000211305[--],	1	ENSG00000068784[SRBD1],	1	ENSG00000068784[SRBD1],	1	1	0	1	0	1	1	0	0	1	1	0	1	0	1	1	1	0	1	1	1	0	0	0	1	1	0	1	0
2p21	46095190	46912586	0.817397	66% (19/29)	0.00266533	12	ENSG00000171132[PRKCE], ENSG00000116016[EPAS1], ENSG00000211311[--], ENSG00000187600[--], ENSG00000171142[ATP6V1E2], ENSG00000119729[RHOQ], ENSG00000151665[PIGF], ENSG00000119878[CRIPT], ENSG00000205024[Q6ZVP5_HUMAN], ENSG00000205023[Q6ZSF1_HUMAN], ENSG00000203445[--], ENSG00000171150[SOCS5],	1	ENSG00000116016[EPAS1],	1	ENSG00000171132[PRKCE],	0	1	0	1	0	1	1	0	0	1	1	0	1	0	1	1	1	1	1	1	1	1	1	0	1	1	0	1	0
2p16.1	56033568	57661658	1.62809	55% (16/29)	0.007996	6	ENSG00000207548[hsa-mir-217], ENSG00000207798[hsa-mir-216], ENSG00000211520[--], ENSG00000175888[Q8N8T8_HUMAN], ENSG00000055813[Q96PX6_HUMAN], ENSG00000199395[5S_rRNA],	0		0		1	0	0	0	1	1	1	0	0	1	0	0	0	0	0	1	1	0	1	1	1	1	0	1	1	1	1	1	0
2p16.1	59835473	60825661	0.990189	52% (15/29)	0.007996	5	ENSG00000200807[U1], ENSG00000119866[BCL11A], ENSG00000209290[--], ENSG00000209306[--], ENSG00000175798[--],	0		0		0	0	0	1	1	1	1	0	0	1	0	0	1	0	1	1	1	1	0	1	1	0	0	1	1	0	0	1	0
2p13.1	74078575	75322521	1.24395	90% (26/29)	0.00266533	32	ENSG00000187605[K0401_HUMAN], ENSG00000177620[Q9BSL4_HUMAN], ENSG00000163170[BOLA3], ENSG00000114978[MOBK1B], ENSG00000198845[Q9HDB3_HUMAN], ENSG00000065911[MTHFD2], ENSG00000188687[SLC4A5], ENSG00000204843[DCTN1], ENSG00000159239[--], ENSG00000005448[WDR54], ENSG00000114993[RTKN], ENSG00000115274[ZNHIT4], ENSG00000173027[WBP1], ENSG00000115275[GCS1_HUMAN], ENSG00000204822[MRPL53], ENSG0000013563…	0		0		1	1	1	1	1	1	1	0	1	1	1	1	1	1	1	1	1	1	0	1	1	1	1	1	1	1	0	1	1
2q11.1	95954683	96352638	0.397956	59% (17/29)	0.007996	11	ENSG00000204693[730995], ENSG00000208683[--], ENSG00000186281[NP_997211.1], ENSG00000181210[NM_000682.5], ENSG00000188886[ASTL], ENSG00000158050[DUSP2], ENSG00000084090[STARD7], ENSG00000204685[NP_001032305.1], ENSG00000135956[TMEM127], ENSG00000144021[WDR39], ENSG00000144028[ASCC3L1],	1	ENSG00000158050[DUSP2],	1	ENSG00000144021[WDR39],	1	1	0	1	0	1	1	0	0	1	1	0	1	0	0	1	1	1	0	1	1	0	1	1	1	1	0	0	0
2q12.2	105455509	106436240	0.980732	76% (22/29)	0.00266533	7	ENSG00000071051[NCK2], ENSG00000179093[--], ENSG00000119147[C2orf40], ENSG00000115652[UXS1], ENSG00000186659[649406], ENSG00000169659[Q15195_HUMAN], ENSG00000153165[653489],	0		0		1	1	0	1	1	1	1	0	1	1	1	0	1	0	1	1	1	1	0	1	1	1	0	1	1	1	1	1	0
2q21.2	132496324	133299754	0.803431	69% (20/29)	0.00266533	16	ENSG00000197294[ZNF72], ENSG00000163046[C21orf99], ENSG00000208344[--], ENSG00000202174[5_8S_rRNA], ENSG00000200236[SSU_rRNA_5], ENSG00000207860[hsa-mir-560], ENSG00000208335[--], ENSG00000211547[--], ENSG00000186653[Q86VD6_HUMAN], ENSG00000196888[Q8N8E8_HUMAN], ENSG00000199460[U6], ENSG00000183840[GPR39], ENSG00000200718[7SK], ENSG00000150551[LYPD1], ENSG00000189237[Q6ZVE2_HUMAN], ENSG0000017677…	0		0		0	1	0	0	1	1	0	0	1	1	1	1	1	0	1	1	1	1	0	0	1	1	0	1	1	1	1	1	1
2q35	218413390	219628584	1.2152	66% (19/29)	0.00266533	39	ENSG00000079308[TNS1], ENSG00000188282[RUFY4], ENSG00000180871[IL8RB], ENSG00000163464[IL8RA], ENSG00000208079[--], ENSG00000163466[ARPC2], ENSG00000179921[GPBAR1], ENSG00000127837[AAMP], ENSG00000127838[PNKD], ENSG00000135926[TMBIM1], ENSG00000204158[--], ENSG00000177452[XR_018493.1], ENSG00000158428[NP_940961.1], ENSG00000018280[SLC11A1], ENSG00000144579[CTDSP1], ENSG00000199121[hsa-mir-26b], E…	2	ENSG00000079308[TNS1], ENSG00000163501[IHH],	1	ENSG00000079308[TNS1],	1	1	0	1	1	1	1	0	1	1	1	0	1	1	1	1	0	0	1	1	1	0	1	0	1	1	0	0	0
3p25.3	9052623	9525222	0.4726	76% (22/29)	0.00266533	7	ENSG00000196220[SRGAP3], ENSG00000134077[THUMPD3], ENSG00000209739[--], ENSG00000206573[XR_017845.1], ENSG00000168137[SETD5], ENSG00000206572[--], ENSG00000156959[LHFPL4],	0		0		1	1	1	0	1	1	1	1	1	0	1	1	1	1	0	1	1	0	1	0	1	1	0	1	0	1	1	1	1
3p25.3-p25.2	10471704	11603220	1.13152	72% (21/29)	0.00266533	9	ENSG00000157087[ATP2B2], ENSG00000132164[SLC6A11], ENSG00000157103[SLC6A1], ENSG00000196639[HRH1], ENSG00000197548[ATG7], ENSG00000203655[--], ENSG00000203654[--], ENSG00000144560[VGLL4], ENSG00000197141[Q8N9I2_HUMAN],	0		0		1	0	1	0	1	1	1	1	1	1	1	1	1	1	0	1	1	0	1	0	1	1	0	1	0	1	1	1	0
3p25.1	13114468	14266088	1.15162	62% (18/29)	0.00533067	9	ENSG00000132182[NUP210], ENSG00000163517[HDAC11], ENSG00000163520[FBLN2], ENSG00000154764[WNT7A], ENSG00000180438[TPRXL], ENSG00000163528[CHCHD4], ENSG00000170876[TMEM43], ENSG00000154767[XPC], ENSG00000170860[LSM3],	0		0		1	0	0	0	0	1	1	0	1	1	1	1	1	1	0	1	1	0	1	0	1	1	1	1	0	1	0	1	0
3p22.2-p22.1	38155355	39502399	1.34705	55% (16/29)	0.007996	28	ENSG00000172936[MYD88], ENSG00000172939[OXSR1], ENSG00000172940[SLC22A13], ENSG00000199514[U6], ENSG00000144671[SLC22A14], ENSG00000093217[XYLB], ENSG00000114739[ACVR2B], ENSG00000157036[ENDOGL1], ENSG00000207512[Y], ENSG00000183873[SCN5A], ENSG00000185313[SCN10A], ENSG00000168356[SCN11A], ENSG00000206708[U6], ENSG00000210328[--], ENSG00000210332[--], ENSG00000114742[WDR48], ENSG00000114745[GORAS…	1	ENSG00000144655[AXUD1],	0		0	0	0	0	1	1	1	1	1	1	1	1	0	1	0	0	1	0	1	0	1	1	0	1	0	1	0	1	0
3p21.31	45766515	46702540	0.936026	59% (17/29)	0.007996	19	ENSG00000163817[SLC6A20], ENSG00000163818[LZTFL1], ENSG00000173585[CCR9], ENSG00000201635[Y], ENSG00000163820[FYCO1], ENSG00000172215[CXCR6], ENSG00000173578[XCR1], ENSG00000163823[CCR1], ENSG00000183625[CCR3], ENSG00000121807[CCR2], ENSG00000160791[CCR5], ENSG00000121797[CCRL2], ENSG00000012223[LTF], ENSG00000163825[RTP3], ENSG00000163827[LRRC2], ENSG00000163826[LUZPP1], ENSG00000163828[TDGF1], …	1	ENSG00000121797[CCRL2],	0		0	0	0	1	1	1	1	0	1	1	1	1	0	1	0	1	1	0	1	0	1	1	0	1	0	1	0	1	0
3p21.31	46702540	47633531	0.930992	62% (18/29)	0.00533067	20	ENSG00000178038[ALS2CL], ENSG00000181585[TMIE], ENSG00000206549[TSP50_HUMAN], ENSG00000188086[NP_954652.1], ENSG00000178055[NP_874361.1], ENSG00000160808[MYL3], ENSG00000160801[PTHR1], ENSG00000160799[CCDC12], ENSG00000160796[NBEAL2], ENSG00000181555[SETD2], ENSG00000088727[KIF9], ENSG00000210549[--], ENSG00000114648[KLHL18], ENSG00000076201[PTPN23], ENSG00000114650[SCAP_HUMAN], ENSG00000163832[T…	1	ENSG00000160801[PTHR1],	1	ENSG00000114646[CSPG5],	1	0	0	1	0	0	1	1	1	0	1	1	1	1	0	0	1	1	1	0	0	1	1	1	1	1	0	1	0
3p21.31	48180846	48879848	0.699003	48% (14/29)	0.007996	23	ENSG00000164045[CDC25A], ENSG00000202460[U7], ENSG00000206548[--], ENSG00000164047[CAMP], ENSG00000164048[ZNF589], ENSG00000199476[Y], ENSG00000172113[NME6], ENSG00000164049[FBXW12], ENSG00000210612[--], ENSG00000164050[PLXNB1], ENSG00000164051[CCDC51], ENSG00000164053[TREX1], ENSG00000164054[NP_057563.3], ENSG00000114268[PFKFB4], ENSG00000145040[UCN2], ENSG00000114270[COL7A1], ENSG00000211535[--…	0		0		0	0	0	1	0	0	1	0	1	0	1	1	0	1	0	0	1	1	1	0	0	1	0	1	1	1	0	1	0
3p21.2-p21.1	51667208	52254614	0.587407	69% (20/29)	0.00266533	21	ENSG00000164080[RAD54L2], ENSG00000164081[TEX264], ENSG00000201595[5S_rRNA], ENSG00000164082[GRM2], ENSG00000173389[IQCF1], ENSG00000206542[401067], ENSG00000184345[IQCF2], ENSG00000210724[--], ENSG00000114767[RNU3IP2], ENSG00000041880[PARP3], ENSG00000180929[GPR62], ENSG00000090097[PCBP4], ENSG00000114779[ABHD14B], ENSG00000042022[ABHD14A], ENSG00000114786[ACY1], ENSG00000162244[RPL29], ENSG0000…	0		0		1	1	0	1	0	0	1	0	1	1	1	1	1	1	0	0	1	1	1	0	1	1	1	1	1	1	0	1	0
3p21.1	52720543	53444674	0.724132	79% (23/29)	0.00266533	13	ENSG00000114904[NEK4], ENSG00000055957[ITIH1], ENSG00000162267[ITIH3], ENSG00000055955[MUSTN1], ENSG00000163935[SFMBT1], ENSG00000175789[Q8N779_HUMAN], ENSG00000163933[RFT1], ENSG00000163932[PRKCD], ENSG00000163931[TKT], ENSG00000210751[--], ENSG00000162290[DCP1A], ENSG00000206902[Y], ENSG00000207109[U38],	2	ENSG00000055957[ITIH1], ENSG00000163931[TKT],	0		1	1	1	1	1	1	1	1	1	1	1	1	1	1	0	0	1	1	1	0	0	1	1	1	1	1	0	1	0
3p21.1	53444674	54399594	0.954921	48% (14/29)	0.00266533	7	ENSG00000157388[CACNA1D], ENSG00000016391[CHDH], ENSG00000056736[IL17RB], ENSG00000113812[ACTR8], ENSG00000113811[SELK_HUMAN], ENSG00000210776[--], ENSG00000157445[CACNA2D3],	0		0		0	0	0	1	0	0	1	0	0	0	1	1	0	1	0	0	1	1	1	0	1	1	0	1	1	1	0	1	0
3p21.1-p14.3	54399594	55202539	0.802946	69% (20/29)	0.00266533	2	ENSG00000157445[CACNA2D3], ENSG00000144771[LRTM1],	0		0		0	0	1	1	0	1	1	1	1	0	1	1	1	1	0	0	1	1	1	0	1	1	0	1	1	1	1	1	0
3p14.2	61470834	62712651	1.24182	66% (19/29)	0.00266533	7	ENSG00000144724[PTPRG], ENSG00000200100[Y], ENSG00000168370[--], ENSG00000182801[ID2B], ENSG00000114405[C3orf14], ENSG00000153266[FEZF2], ENSG00000163618[CADPS],	1	ENSG00000163618[CADPS],	0		0	0	0	1	1	0	1	1	1	1	0	1	0	1	1	0	1	1	1	0	1	1	0	1	1	1	1	1	0
3p14.1	63801928	64774986	0.973059	62% (18/29)	0.00533067	9	ENSG00000163632[Q96BT1_HUMAN], ENSG00000163634[THOC7], ENSG00000163635[ATXN7], ENSG00000163636[PSMD6], ENSG00000200222[U3], ENSG00000189196[Q6ZUD9_HUMAN], ENSG00000163637[PRICKLE2], ENSG00000210907[--], ENSG00000163638[ADAMTS9],	1	ENSG00000163636[PSMD6],	0		0	0	0	1	1	0	1	1	1	1	0	1	0	1	1	0	1	1	1	0	0	1	0	1	1	1	1	1	0
3p14.1-p13	71243505	72132566	0.889062	48% (14/29)	0.007996	5	ENSG00000114861[FOXP1], ENSG00000163412[EIF4E3], ENSG00000170837[GPR27], ENSG00000163421[PROK2], ENSG00000210995[--],	2	ENSG00000114861[FOXP1], ENSG00000163412[EIF4E3],	0		0	0	0	1	0	0	1	0	1	0	0	0	0	1	1	0	1	1	1	0	0	1	0	1	1	1	1	1	0
3p13	72132566	73041714	0.909149	62% (18/29)	0.00533067	5	ENSG00000163602[RYBP], ENSG00000199469[U1], ENSG00000211012[--], ENSG00000144736[SHQ1], ENSG00000172986[732216],	0		0		0	0	0	1	1	0	1	0	1	0	1	1	0	1	1	0	1	1	1	0	1	1	0	1	1	1	1	1	0
3p13	73041714	73739243	0.69753	59% (17/29)	0.007996	9	ENSG00000172986[732216], ENSG00000163605[PPP4R2], ENSG00000199192[U7], ENSG00000211015[--], ENSG00000211018[--], ENSG00000200445[U2], ENSG00000182921[344709], ENSG00000206691[U6], ENSG00000121440[PDZRN3],	0		0		0	0	0	1	0	0	1	1	1	0	0	1	0	1	1	0	1	1	1	0	1	1	0	1	1	1	1	1	0
4p16.2	3127987	3866801	0.738815	83% (24/29)	0.00266533	9	ENSG00000197386[HD], ENSG00000188981[NP_001013000.2], ENSG00000159788[RGS12], ENSG00000109758[HGFAC], ENSG00000175920[DOK7], ENSG00000206074[Q96I42_HUMAN], ENSG00000163956[LRPAP1], ENSG00000181713[NP_775932.1], ENSG00000184160[ADRA2C],	0		0		1	0	1	1	1	1	1	0	1	1	1	0	1	1	1	1	1	1	1	1	1	1	1	1	0	1	0	1	1
4p16.1	8137996	9269836	1.13184	76% (22/29)	0.00266533	22	ENSG00000205949[Q0WX57_HUMAN], ENSG00000205948[Q0WX57_HUMAN], ENSG00000205947[Q0WX57_HUMAN], ENSG00000205946[XR_000551.1], ENSG00000188438[--], ENSG00000186146[DEFB131], ENSG00000184795[--], ENSG00000202054[5S_rRNA], ENSG00000163995[ABLIM2], ENSG00000125089[SH3TC1], ENSG00000205965[Q6ZTX6_HUMAN], ENSG00000170801[HTRA3], ENSG00000087008[ACOX3], ENSG00000155275[C4orf23], ENSG00000205959[NP_00100170…	0		0		1	1	1	1	1	1	1	0	1	1	1	0	1	1	1	1	0	1	1	1	0	1	1	1	0	1	0	0	1
4q13.3	72145070	72871733	0.726664	72% (21/29)	0.00533067	3	ENSG00000210828[--], ENSG00000080493[SLC4A4], ENSG00000145321[GC],	1	ENSG00000080493[SLC4A4],	1	ENSG00000080493[SLC4A4],	0	0	1	0	0	1	0	0	0	0	1	1	1	1	1	1	1	1	1	1	1	1	1	1	1	1	1	1	1
4q31.3	152920933	153981712	1.06078	76% (22/29)	0.00266533	8	ENSG00000208788[--], ENSG00000208790[--], ENSG00000170009[Q9NTH0_HUMAN], ENSG00000178429[XR_017186.1], ENSG00000170006[TMEM154], ENSG00000169989[TIGD4], ENSG00000164144[ARFIP1], ENSG00000109670[FBXW7],	0		0		0	1	0	1	0	1	1	1	1	1	0	1	1	0	1	1	1	1	1	0	1	1	1	1	1	1	0	1	1
4q35.2	190324300	190594225	0.269926	55% (16/29)	0.007996	1	ENSG00000205101[728856],	0		0		0	0	0	1	0	1	1	0	1	0	0	1	0	0	0	0	1	1	1	0	0	1	1	1	1	1	1	1	1
5q14.1	78700401	79209387	0.508987	52% (15/29)	0.00266533	7	ENSG00000201112[Y], ENSG00000207391[Y], ENSG00000152413[HOMER1], ENSG00000183239[--], ENSG00000187544[--], ENSG00000164329[PAPD4], ENSG00000164309[CMYA5],	0		0		1	0	1	1	1	0	1	0	1	1	1	0	1	0	0	1	0	1	1	0	0	1	0	0	1	0	0	0	1
5q23.3	128041423	128882292	0.84087	62% (18/29)	0.00266533	3	ENSG00000113396[SLC27A6], ENSG00000066583[ISOC1], ENSG00000145808[ADAMTS19],	0		0		1	1	0	1	1	1	1	0	1	1	1	1	1	0	0	0	1	1	0	0	1	1	1	0	1	0	0	0	1
5q31.1	131260927	131590484	0.329558	59% (17/29)	0.00266533	4	ENSG00000164400[CSF2], ENSG00000164399[IL3], ENSG00000072682[P4HA2], ENSG00000164398[ACSL6],	1	ENSG00000164399[IL3],	0		1	1	1	1	1	1	1	0	1	1	1	0	1	0	1	1	0	1	1	0	0	0	0	0	1	0	0	0	1
5q31.1	132157215	134124694	1.96748	72% (21/29)	0.00266533	32	ENSG00000207459[U6], ENSG00000208898[--], ENSG00000201274[5S_rRNA], ENSG00000208888[--], ENSG00000199677[Y], ENSG00000201582[U6], ENSG00000207222[U6], ENSG00000113615[SEC24A], ENSG00000170606[HSPA4], ENSG00000202417[Y], ENSG00000164615[CAMLG], ENSG00000145833[DDX46], ENSG00000053108[FSTL4], ENSG00000164406[LEAP2], ENSG00000201298[U6], ENSG00000113553[O75230_HUMAN], ENSG00000113583[C5orf15], ENSG0…	3	ENSG00000170606[HSPA4], ENSG00000081059[TCF7], ENSG00000113558[SKP1A],	2	ENSG00000170606[HSPA4], ENSG00000006837[CDKL3],	1	1	1	1	1	1	1	0	1	1	1	0	1	1	1	1	0	1	1	0	0	0	1	1	1	1	0	0	1
5q31.3	140567235	141522708	0.955474	76% (22/29)	0.00266533	23	ENSG00000113552[GNPDA1], ENSG00000131507[NDFIP1], ENSG00000208724[--], ENSG00000204956[PCDHGA1], ENSG00000204955[PCDHGA2], ENSG00000081853[PCDHGC5], ENSG00000131504[DIAPH1], ENSG00000171720[HDAC3], ENSG00000164620[C5orf16], ENSG00000197948[FCHSD1], ENSG00000120318[CENTD3], ENSG00000120328[PCDHB12], ENSG00000187372[PCDHB13], ENSG00000156453[PCDH1], ENSG00000120327[PCDHB14], ENSG00000180225[--], EN…	4	ENSG00000113552[GNPDA1], ENSG00000081853[PCDHGC5], ENSG00000187372[PCDHB13], ENSG00000081791[KIAA0141],	1	ENSG00000187372[PCDHB13],	1	1	1	1	1	1	1	0	1	1	1	0	1	1	1	1	0	1	1	1	0	1	1	1	1	0	0	0	1
5q33.1	148315313	148997390	0.682078	62% (18/29)	0.00266533	14	ENSG00000183111[NP_001001669.2], ENSG00000208650[--], ENSG00000200161[7SK], ENSG00000200188[U6], ENSG00000169247[SH3TC2], ENSG00000173210[ABLIM3], ENSG00000157510[NP_689619.1], ENSG00000164284[GRPEL2], ENSG00000145882[PCYOX1L], ENSG00000127743[IL17B], ENSG00000113712[CSNK1A1], ENSG00000207714[hsa-mir-584], ENSG00000208035[hsa-mir-143], ENSG00000207700[hsa-mir-145],	0		0		1	1	1	1	1	1	1	0	1	1	1	0	1	0	1	0	0	1	1	1	0	0	1	1	1	0	0	0	0
5q33.1	149639591	150715089	1.0755	52% (15/29)	0.00266533	24	ENSG00000164587[RPS14], ENSG00000070614[NDST1], ENSG00000171992[SYNPO], ENSG00000164591[MYOZ3], ENSG00000177512[Q96MU4_HUMAN], ENSG00000086589[RBM22], ENSG00000132912[DCTN4], ENSG00000181368[NP_116565.2], ENSG00000204891[--], ENSG00000145908[ZNF300], ENSG00000145901[TNIP1], ENSG00000178672[--], ENSG00000197043[ANXA6], ENSG00000070808[CAMK2A], ENSG00000208624[--], ENSG00000183876[ARSI], ENSG000000…	0		0		1	1	1	0	1	1	1	0	1	1	1	0	1	1	0	0	0	1	1	0	0	0	1	0	1	0	0	0	0
5q35.1-q35.2	171457611	172864129	1.40652	55% (16/29)	0.00266533	24	ENSG00000072786[STK10], ENSG00000208401[--], ENSG00000168246[UBTD2_HUMAN], ENSG00000206741[Y], ENSG00000204762[NP_001007543.1], ENSG00000174705[SH3PXD2B], ENSG00000197823[Q86YX8_HUMAN], ENSG00000204760[Q6ZNS8_HUMAN], ENSG00000120129[DUSP1], ENSG00000113719[ERGIC1], ENSG00000196543[--], ENSG00000204758[Q6ZUG4_HUMAN], ENSG00000037241[RPL26L1], ENSG00000207210[Y], ENSG00000208394[--], ENSG0000011373…	1	ENSG00000120129[DUSP1],	0		1	0	1	1	0	1	1	0	1	1	1	0	1	1	1	0	0	1	1	0	0	0	1	1	1	0	0	0	0
5q35.2	174867458	175511240	0.643783	59% (17/29)	0.00266533	8	ENSG00000164466[SFXN1], ENSG00000208386[--], ENSG00000113749[HRH2], ENSG00000145920[CPLX2], ENSG00000051596[THOC3], ENSG00000204747[Q6ZR32_HUMAN], ENSG00000182230[O94852_HUMAN], ENSG00000200648[U6],	0		0		1	0	1	1	1	1	1	0	1	1	1	0	1	0	1	1	0	1	1	0	0	1	1	0	1	0	0	0	0
6p21.32	32547001	33093794	0.546794	86% (25/29)	0.00266533	19	ENSG00000198502[HLA-DRB5], ENSG00000199931[U1], ENSG00000200335[U1], ENSG00000196126[HLA-DRB4], ENSG00000196735[HLA-DQA1], ENSG00000198599[--], ENSG00000179344[HLA-DQB1], ENSG00000204276[HLA-DQA2], ENSG00000204275[HLA-DQB2], ENSG00000204273[HLA-DOB], ENSG00000204267[TAP2], ENSG00000204264[PSMB8], ENSG00000168394[TAP1], ENSG00000204261[PSMB9], ENSG00000204259[PPP1R2P1], ENSG00000204258[HLA-DMB], E…	2	ENSG00000179344[HLA-DQB1], ENSG00000204252[HLA-DOA],	1	ENSG00000204252[HLA-DOA],	1	1	1	0	1	1	1	1	0	1	1	1	1	1	1	1	1	1	1	1	1	1	1	1	0	1	1	0	1
6q25.3	160358159	160544461	0.186303	79% (23/29)	0.00266533	2	ENSG00000197081[IGF2R], ENSG00000175003[SLC22A1],	0		0		1	1	1	1	1	1	1	1	0	1	1	1	1	1	0	1	1	1	0	1	1	0	1	1	1	0	1	1	0
7q21.3-q22.1	97250760	98053881	0.803122	55% (16/29)	0.00266533	15	ENSG00000070669[ASNS], ENSG00000196751[Q8N8L5_HUMAN], ENSG00000185251[NP_001013747.1], ENSG00000183444[NR_002822.1], ENSG00000135175[OCM], ENSG00000206890[SRP_euk_arch], ENSG00000208909[--], ENSG00000164715[LMTK2], ENSG00000208904[--], ENSG00000180535[BHLHB8], ENSG00000205356[NP_056210.1], ENSG00000164713[BRI3], ENSG00000006453[BAIAP2L1], ENSG00000170682[NP_001034995.1], ENSG00000208899[--],	1	ENSG00000185251[NP_001013747.1],	1	ENSG00000185251[NP_001013747.1],	0	1	0	1	0	0	0	0	1	1	0	1	1	0	1	1	0	0	1	0	0	1	1	1	0	1	1	1	1
7q34	138221050	138846751	0.625702	55% (16/29)	0.00266533	10	ENSG00000122778[Q9H0M3_HUMAN], ENSG00000146858[ZC3HAV1L], ENSG00000105939[ZC3HAV1], ENSG00000105948[TTC26], ENSG00000157741[Q6ZU65_HUMAN], ENSG00000206843[U6], ENSG00000207796[hsa-mir-594], ENSG00000164898[NP_932068.1], ENSG00000146963[LUC7L2], ENSG00000188883[NP_940910.1],	0		0		0	0	1	0	1	0	0	0	0	0	0	1	0	1	1	1	1	1	0	1	1	1	1	0	1	1	1	1	0
7q34	138846751	139857454	1.0107	59% (17/29)	0.00266533	13	ENSG00000064393[HIPK2], ENSG00000059377[TBXAS1], ENSG00000059378[PARP12], ENSG00000006459[K1718_HUMAN], ENSG00000200430[Y], ENSG00000199971[U6], ENSG00000199283[U1], ENSG00000157800[SLC37A3], ENSG00000208367[--], ENSG00000208363[--], ENSG00000202472[5S_rRNA], ENSG00000146955[NP_001008749.1], ENSG00000133606[MKRN1],	0		0		0	1	1	1	1	1	1	0	0	1	0	0	1	0	1	1	1	0	0	1	1	1	0	1	1	0	0	0	1
7q36.1	149998325	150391833	0.393509	62% (18/29)	0.00266533	13	ENSG00000106560[GIMAP2], ENSG00000196329[GIMAP5], ENSG00000177590[--], ENSG00000106565[NP_054739.2], ENSG00000002933[TMEM176A], ENSG00000181652[ATG9B], ENSG00000002726[ABP1], ENSG00000055118[KCNH2], ENSG00000164867[NOS3], ENSG00000197150[ACCN3], ENSG00000204907[Q6ZV62_HUMAN], ENSG00000164885[CDK5], ENSG00000164889[SLC4A2],	0		0		1	1	1	1	1	1	1	0	0	1	0	0	1	0	1	1	1	0	1	1	1	0	1	0	1	0	0	0	1
7q36.1	150391833	151096113	0.704281	69% (20/29)	0.00266533	20	ENSG00000164889[SLC4A2], ENSG00000164896[FASTK], ENSG00000164897[TMUB1], ENSG00000133612[CENTG3], ENSG00000164900[GBX1], ENSG00000146926[ASB10], ENSG00000204903[392843], ENSG00000183016[XR_018506.1], ENSG00000033050[ABCF2], ENSG00000033100[CHGUT_HUMAN], ENSG00000211517[--], ENSG00000082014[SMARCD3], ENSG00000013374[NUB1_HUMAN], ENSG00000181721[Q96MQ1_HUMAN], ENSG00000188410[Q6ZS57_HUMAN], ENSG000…	2	ENSG00000082014[SMARCD3], ENSG00000013374[NUB1_HUMAN],	1	ENSG00000013374[NUB1_HUMAN],	1	1	1	1	1	1	1	0	0	1	0	0	1	1	1	1	1	0	1	1	1	1	1	0	1	0	0	0	1
7q36.3	155185106	155696634	0.511529	55% (16/29)	0.00266533	5	ENSG00000184863[PRR8], ENSG00000188589[RBM33], ENSG00000164690[SHH], ENSG00000204876[Q6ZVM9_HUMAN], ENSG00000207061[Y],	0		0		1	0	1	1	1	1	1	0	0	1	0	0	1	0	1	1	1	0	0	1	1	0	0	1	1	0	0	0	1
7q36.3	156767718	157531741	0.764024	76% (22/29)	0.00266533	5	ENSG00000208243[--], ENSG00000105993[DNAJB6], ENSG00000178158[Q8N7D3_HUMAN], ENSG00000155093[PTPRN2], ENSG00000207960[hsa-mir-153-2],	0		0		1	0	1	1	1	1	1	0	1	1	0	0	1	1	1	1	1	0	1	1	1	1	1	1	1	0	1	0	1
7q36.3	157531741	158106145	0.574405	62% (18/29)	0.00266533	4	ENSG00000155093[PTPRN2], ENSG00000208234[--], ENSG00000197583[Q8NHA3_HUMAN], ENSG00000207637[hsa-mir-595],	0		0		1	1	1	1	1	1	1	0	0	1	0	0	1	0	1	0	1	0	1	1	1	1	0	0	1	0	1	0	1
8p23.3	568026	808128	0.240103	76% (22/29)	0.00266533	3	ENSG00000180184[Q8NF75_HUMAN], ENSG00000206100[NP_001013673.1], ENSG00000104714[ERICH1],	1	ENSG00000104714[ERICH1],	1	ENSG00000104714[ERICH1],	0	0	1	1	1	1	1	0	1	1	1	1	1	0	1	1	1	0	1	1	1	1	0	1	0	1	1	1	1
8p23.3	808128	1326327	0.5182	72% (21/29)	0.00266533	0		0		0		1	0	1	1	1	1	1	0	1	1	0	1	1	0	1	1	1	0	1	1	1	1	0	1	0	1	0	1	1
8p23.3	1326327	1954169	0.627843	55% (16/29)	0.007996	6	ENSG00000198010[DLGAP2], ENSG00000182372[CLN8], ENSG00000104728[ARHGEF10], ENSG00000206087[Q6ZSW5_HUMAN], ENSG00000176595[KBTBD11], ENSG00000207826[hsa-mir-596],	0		0		0	0	1	1	1	1	0	0	1	1	0	1	0	0	1	1	0	0	1	1	0	0	0	1	0	1	1	1	1
8p23.3-p23.2	1954169	2643823	0.689655	59% (17/29)	0.007996	1	ENSG00000036448[MYOM2],	0		0		0	0	1	1	1	1	0	0	1	1	0	1	0	0	1	1	0	0	1	1	0	1	0	1	0	1	1	1	1
8p23.2	2643823	3483482	0.83966	66% (19/29)	0.00533067	1	ENSG00000183117[CSMD1],	0		0		0	0	1	1	1	1	0	0	1	1	0	1	0	0	1	1	1	0	1	1	1	1	0	1	0	1	1	1	1
8p23.2	3483482	4135264	0.651783	59% (17/29)	0.007996	1	ENSG00000209946[--],	0		0		0	0	1	1	1	1	0	0	1	1	0	0	0	0	1	1	1	0	1	1	0	1	0	1	0	1	1	1	1
8p23.2	4135264	5304517	1.16925	59% (17/29)	0.007996	2	ENSG00000209245[--], ENSG00000206661[U70],	0		0		0	0	1	1	1	1	0	0	1	1	0	0	0	0	1	1	1	0	1	1	0	1	0	1	0	1	1	1	1
8p23.2	5304517	5647951	0.343435	62% (18/29)	0.007996	0		0		0		0	0	1	1	1	1	0	0	1	1	0	0	0	0	1	1	1	0	1	1	1	1	0	1	0	1	1	1	1
8p23.2-p23.1	5647951	6294141	0.646191	48% (14/29)	0.007996	2	ENSG00000147316[MCPH1], ENSG00000200621[7SK],	0		0		0	0	1	1	0	1	0	0	0	1	0	0	0	0	1	1	0	0	1	1	0	1	0	1	0	1	1	1	1
8p23.1	6294141	7394755	1.10061	66% (19/29)	0.00533067	38	ENSG00000091879[ANGPT2], ENSG00000177806[Q96LV3_HUMAN], ENSG00000155189[AGPAT5], ENSG00000186530[XKR5], ENSG00000164825[DEFB1], ENSG00000164822[DEFA6], ENSG00000164821[DEFA4], ENSG00000206047[DEFA1], ENSG00000182391[--], ENSG00000185918[DEFA3], ENSG00000206042[648637], ENSG00000164816[DEFA5], ENSG00000177306[NP_001035155.1], ENSG00000206041[645378], ENSG00000206040[NP_001020644.1], ENSG0000020603…	3	ENSG00000164825[DEFB1], ENSG00000177257[BD02_HUMAN], ENSG00000177023[DEFB104A],	1	ENSG00000177023[DEFB104A],	0	0	1	1	1	1	1	0	1	1	0	1	0	0	1	1	1	0	1	1	1	1	0	1	0	0	1	1	1
8p23.1	9232334	10310074	1.07774	55% (16/29)	0.007996	10	ENSG00000205979[Q6XYA8_HUMAN], ENSG00000173273[TNKS], ENSG00000175806[MSRA], ENSG00000210108[--], ENSG00000201815[U6], ENSG00000210125[--], ENSG00000210101[--], ENSG00000210136[--], ENSG00000207701[hsa-mir-597], ENSG00000208010[hsa-mir-124a-1],	0		0		0	0	1	1	1	1	0	0	1	1	0	1	0	0	1	1	0	0	1	1	0	1	0	1	0	0	1	1	1
8p23.1	10310074	11201017	0.890944	62% (18/29)	0.007996	14	ENSG00000175806[MSRA], ENSG00000184647[NP_940866.2], ENSG00000183638[Q8IWN7-2], ENSG00000171060[NP_001035121.1], ENSG00000171056[SOX7], ENSG00000104637[PINX1_HUMAN], ENSG00000171044[XKR6], ENSG00000196848[Q96KT2_HUMAN], ENSG00000178223[Q96KT8_HUMAN], ENSG00000104643[MTMR9], ENSG00000207128[U6], ENSG00000210158[--], ENSG00000209096[--], ENSG00000207600[hsa-mir-598],	1	ENSG00000104643[MTMR9],	0		0	0	1	1	1	1	1	0	1	1	0	1	0	0	1	0	1	0	1	1	0	1	0	1	0	1	1	1	1
8p23.1-p22	11685402	13042444	1.35704	59% (17/29)	0.007996	27	ENSG00000177586[--], ENSG00000205884[DB136_HUMAN], ENSG00000205883[DB135_HUMAN], ENSG00000205882[DB134_HUMAN], ENSG00000182945[NP_958804.1], ENSG00000205880[--], ENSG00000205879[FAM90A2P], ENSG00000197246[653726], ENSG00000186523[NP_116305.2], ENSG00000205877[--], ENSG00000205876[389633], ENSG00000184352[653726], ENSG00000145002[FAM86B1], ENSG00000205874[Q6SA06_HUMAN], ENSG00000205873[Q6ZP57_HUMA…	1	ENSG00000164741[DLC1],	2	ENSG00000164741[DLC1], ENSG00000164733[CTSB],	0	0	1	1	1	1	0	0	1	1	1	1	0	0	1	1	0	0	1	1	0	1	0	1	0	0	1	1	1
8p22	17199435	18122048	0.922614	55% (16/29)	0.007996	9	ENSG00000003987[MTMR7], ENSG00000003989[SLC7A2], ENSG00000104763[ASAH1], ENSG00000104213[PDGFRL], ENSG00000129422[MTUS1], ENSG00000210287[--], ENSG00000171428[NAT1], ENSG00000104760[FGL1], ENSG00000078674[PCM1],	1	ENSG00000104760[FGL1],	0		0	0	1	0	1	0	1	0	1	1	0	1	0	0	1	1	0	0	1	1	0	1	0	1	0	1	1	1	1
8p22-p21.3	18122048	21304895	3.18285	62% (18/29)	0.007996	20	ENSG00000199211[U6], ENSG00000199893[5S_rRNA], ENSG00000156006[NAT2], ENSG00000036565[SLC18A1], ENSG00000210340[--], ENSG00000181897[Q7L3Y3_HUMAN], ENSG00000147416[ATP6V1B2], ENSG00000156011[PSD3], ENSG00000210343[--], ENSG00000187229[Q86YR2_HUMAN], ENSG00000061337[LZTS1], ENSG00000104611[SH2D4A], ENSG00000171428[NAT1], ENSG00000147408[CGAT1_HUMAN], ENSG00000210291[--], ENSG00000181508[Q8N1G8_HUM…	0		0		0	0	1	1	1	1	1	0	1	1	0	1	0	0	1	1	0	0	1	1	0	1	0	1	0	1	1	1	1
8p21.3	21304895	22135548	0.830654	69% (20/29)	0.00266533	17	ENSG00000158856[EPB49], ENSG00000168487[BMP1], ENSG00000158863[RAI16], ENSG00000173566[NUDT18], ENSG00000210349[--], ENSG00000168490[PHYHIP], ENSG00000168453[HR], ENSG00000210359[--], ENSG00000168546[GFRA2], ENSG00000147443[DOK2], ENSG00000130227[XPO7], ENSG00000168476[REEP4], ENSG00000158806[NPM2], ENSG00000177725[--], ENSG00000168481[LGI3], ENSG00000158815[FGF17], ENSG00000168484[SFTPC],	1	ENSG00000168484[SFTPC],	0		1	0	1	1	1	1	1	0	1	1	1	1	1	0	1	1	0	0	1	1	0	1	0	1	0	0	1	1	1
8p21.2	24838581	25770702	0.932122	55% (16/29)	0.007996	7	ENSG00000104725[NEFL], ENSG00000104756[KCTD9], ENSG00000147459[DOCK5], ENSG00000184661[CDCA2], ENSG00000147437[GNRH1], ENSG00000134025[EBF2], ENSG00000210447[--],	0		0		0	0	1	1	1	1	0	0	1	1	0	1	0	0	1	1	0	0	1	1	0	1	0	1	0	0	1	1	1
8p21.2-p21.1	26791202	28151037	1.35984	72% (21/29)	0.00266533	18	ENSG00000202242[U6], ENSG00000120899[PTK2B], ENSG00000120885[CLU], ENSG00000197825[--], ENSG00000134014[ELP3], ENSG00000120903[CHRNA2], ENSG00000168077[SCARA3], ENSG00000147419[CCDC25], ENSG00000171320[ESCO2], ENSG00000120915[EPHX2], ENSG00000015592[STMN4], ENSG00000104228[TRIM35], ENSG00000168078[PBK], ENSG00000210465[--], ENSG00000168079[SCARA5], ENSG00000210467[--], ENSG00000189233[Q6ZP73_HUMA…	2	ENSG00000120885[CLU], ENSG00000120903[CHRNA2],	0		1	0	1	1	1	1	1	0	1	1	1	1	1	0	1	1	1	0	1	1	0	1	0	1	0	0	1	1	1
8p12	32309983	32782354	0.472372	48% (14/29)	0.007996	2	ENSG00000157168[NRG1], ENSG00000187508[Q7Z2R7_HUMAN],	0		0		0	0	1	1	1	0	0	0	1	1	0	1	0	0	1	1	0	0	0	1	0	1	0	1	0	0	1	1	1
8p12	34471879	34930924	0.459046	52% (15/29)	0.007996	0		0		0		0	1	0	1	1	0	1	0	0	1	1	0	1	0	1	0	1	0	0	0	1	1	1	1	0	0	1	0	1
8q23.3	114039020	115169741	1.13072	69% (20/29)	0.00266533	2	ENSG00000206719[Y], ENSG00000164796[CSMD3],	0		0		0	0	0	0	1	1	1	1	1	0	1	0	0	1	1	1	1	1	0	1	1	1	1	1	1	0	1	1	1
9p24.3	50190	164727	0.114538	83% (24/29)	0.00266533	2	ENSG00000184492[FOXD4], ENSG00000147996[CBWD1],	0		0		1	0	1	1	1	1	1	0	1	1	1	1	1	1	1	1	1	0	1	1	1	1	0	1	0	1	1	1	1
9p24.3	164727	1247806	1.08308	72% (21/29)	0.007996	9	ENSG00000064218[DMRT3], ENSG00000173253[DMRT2], ENSG00000147996[CBWD1], ENSG00000183784[C9orf66], ENSG00000107099[DOCK8], ENSG00000107104[ANKRD15], ENSG00000137090[DMRT1], ENSG00000210012[--], ENSG00000202172[U6],	0		0		0	0	1	1	1	1	1	0	1	1	0	1	0	1	1	1	1	0	1	1	1	1	0	1	0	1	1	1	1
9p24.1-p23	8212729	9092739	0.880011	48% (14/29)	0.007996	3	ENSG00000153707[PTPRD], ENSG00000196089[Q76N57_HUMAN], ENSG00000202196[U27],	0		0		0	0	1	0	1	0	1	0	1	0	0	0	0	0	0	1	1	1	0	0	1	1	0	1	1	1	0	1	1
9p22.3-p22.2	15798873	16657694	0.858822	79% (23/29)	0.00266533	3	ENSG00000164989[C9orf93], ENSG00000205549[C9orf92], ENSG00000173068[BNC2],	0		0		0	0	1	1	1	1	1	0	1	1	0	1	1	1	1	1	1	1	1	1	1	1	1	1	1	1	0	1	0
9p22.1-p21.3	19814344	20669630	0.855287	59% (17/29)	0.007996	3	ENSG00000200775[U4], ENSG00000171843[MLLT3], ENSG00000188352[KIAA1797],	0		0		0	0	1	1	1	0	1	0	0	0	0	0	0	1	1	1	1	1	0	1	1	1	1	1	1	1	0	1	0
9p21.3	22293524	23838347	1.54482	52% (15/29)	0.007996	2	ENSG00000176399[DMRTA1], ENSG00000107105[ELAVL2],	0		0		0	0	1	0	1	1	0	0	0	0	0	0	0	1	0	1	1	1	0	1	1	1	1	1	1	1	0	1	0
10q22.1	72143312	73316160	1.17285	59% (17/29)	0.007996	11	ENSG00000210259[--], ENSG00000201284[U7], ENSG00000138316[ADAMTS14], ENSG00000166220[C10orf27], ENSG00000166224[SGPL1], ENSG00000166228[PCBD1], ENSG00000107731[UNC5B], ENSG00000198246[SLC29A3], ENSG00000107736[CDH23], ENSG00000107738[C10orf54], ENSG00000197746[PSAP],	1	ENSG00000107738[C10orf54],	0		1	0	1	1	0	1	1	0	1	1	1	0	1	1	1	0	0	1	1	1	0	0	0	0	1	1	0	0	1
10q22.3	79273961	80171344	0.897384	72% (21/29)	0.00266533	9	ENSG00000178775[--], ENSG00000201393[U71], ENSG00000210470[--], ENSG00000210466[--], ENSG00000210457[--], ENSG00000151208[DLG5], ENSG00000204049[Q6ZUH9_HUMAN], ENSG00000148606[POLR3A], ENSG00000138326[RPS24],	0		0		1	0	1	1	1	1	1	1	1	1	1	0	1	1	1	1	0	1	1	1	0	1	0	0	1	1	0	0	1
10q22.3	80171344	81279277	1.10793	69% (20/29)	0.00266533	9	ENSG00000188199[FAM22B], ENSG00000198534[Q9H392_HUMAN], ENSG00000184439[143244], ENSG00000108175[RAI17], ENSG00000108179[PPIF], ENSG00000165424[C10orf56], ENSG00000196513[Q6IS14_HUMAN], ENSG00000182314[SFTPA2], ENSG00000185303[SFTPA1],	0		0		1	1	1	1	1	1	1	0	1	1	1	0	1	1	1	1	0	1	0	1	0	1	1	0	1	1	0	0	0
10q22.3-q23.1	81279277	82260028	0.980752	66% (19/29)	0.00266533	19	ENSG00000122854[SFTPA2B], ENSG00000122852[SFTPA1B], ENSG00000204043[FAM22C], ENSG00000198232[Q9H392_HUMAN], ENSG00000165429[FAM22E], ENSG00000197533[Q6IPT3_HUMAN], ENSG00000133661[SFTPD], ENSG00000204042[647365], ENSG00000204041[647375], ENSG00000133678[CJ057_HUMAN], ENSG00000189129[PLAC9], ENSG00000122359[ANXA11], ENSG00000178510[--], ENSG00000204038[Q6ZRL6_HUMAN], ENSG00000151224[MAT1A], ENSG00…	1	ENSG00000151224[MAT1A],	0		1	1	1	1	1	1	1	1	0	1	1	0	1	1	1	0	0	1	1	1	0	0	1	0	1	1	0	0	0
11p15.5	222718	403170	0.180453	59% (17/29)	0.00266533	11	ENSG00000142082[SIRT3], ENSG00000185627[PSMD13], ENSG00000174885[NALP6], ENSG00000142102[ATHL1], ENSG00000206013[NP_001020466.1], ENSG00000185201[IFITM2], ENSG00000185885[IFITM1], ENSG00000142089[IFITM3], ENSG00000182272[B4GALNT4], ENSG00000184363[PKP3], ENSG00000185187[SIGIRR],	0		0		1	1	1	1	1	0	1	0	1	1	1	0	1	1	0	0	0	0	1	1	0	0	1	0	1	0	0	1	1
11p15.5	1135537	1708184	0.572648	55% (16/29)	0.00266533	17	ENSG00000196292[XR_016172.1], ENSG00000117983[MUC5B], ENSG00000203582[--], ENSG00000078902[TOLLIP], ENSG00000174672[BRSK2], ENSG00000182208[MOB2_HUMAN], ENSG00000205872[Q6ZVK4_HUMAN], ENSG00000184545[DUSP8], ENSG00000183838[KRTAP5-2], ENSG00000205869[KRTAP5-1], ENSG00000197001[--], ENSG00000205867[KRA52_HUMAN], ENSG00000185940[KRTAP5-4], ENSG00000196224[KRTAP5-5], ENSG00000205866[Q6AI09_HUMAN], E…	0		0		1	1	0	1	1	0	1	0	1	1	1	0	1	1	0	0	0	0	1	1	0	0	1	0	1	1	0	1	0
11p15.5	1708184	1914879	0.206696	62% (18/29)	0.00266533	8	ENSG00000188082[--], ENSG00000117984[CTSD], ENSG00000182663[649839], ENSG00000149043[SYT8], ENSG00000130598[TNNI2], ENSG00000130592[LSP1], ENSG00000184682[728008], ENSG00000130595[TNNT3],	2	ENSG00000130598[TNNI2], ENSG00000130592[LSP1],	0		1	1	1	1	1	1	1	0	1	1	1	0	1	1	0	0	0	0	1	1	0	0	1	0	1	1	0	1	0
11p15.5-p15.4	2223517	3006070	0.782554	66% (19/29)	0.00266533	20	ENSG00000183734[ASCL2], ENSG00000110665[C11orf21], ENSG00000064201[TSPAN32], ENSG00000207308[U6], ENSG00000197947[653147], ENSG00000199550[Y], ENSG00000110651[CD81], ENSG00000184281[TSSC4], ENSG00000070985[TRPM5], ENSG00000053918[KCNQ1], ENSG00000174613[KCNQ1DN], ENSG00000129757[CDKN1C], ENSG00000181757[SLC22A18AS], ENSG00000110628[SLC22A18], ENSG00000181649[PHLDA2], ENSG00000205531[NAP1L4], ENSG…	1	ENSG00000184281[TSSC4],	2	ENSG00000184281[TSSC4], ENSG00000181757[SLC22A18AS],	1	1	1	1	1	1	1	0	1	1	1	1	1	1	0	1	0	0	0	1	0	0	1	0	1	1	0	1	0
11p15.4	7791239	8485920	0.694682	76% (22/29)	0.00266533	12	ENSG00000182334[OR5P3], ENSG00000170688[OR5E1P], ENSG00000209423[--], ENSG00000175393[OR10A6], ENSG00000170683[OR10A3], ENSG00000182261[NALP10], ENSG00000175390[EIF3S5], ENSG00000205355[Q6ZT54_HUMAN], ENSG00000166402[TUB], ENSG00000166405[RIC3], ENSG00000166407[LMO1], ENSG00000130413[STK33],	1	ENSG00000175390[EIF3S5],	0		1	1	1	1	1	1	1	1	1	1	1	0	1	1	0	1	0	1	1	1	0	1	1	0	1	1	0	1	0
11p15.4	8485920	9191002	0.705083	52% (15/29)	0.00266533	17	ENSG00000130413[STK33], ENSG00000166436[TRIM66], ENSG00000166441[RPL27A], ENSG00000200983[snoMBI-28], ENSG00000209431[SNORA45], ENSG00000198500[Q96C21_HUMAN], ENSG00000166444[ST5], ENSG00000209434[--], ENSG00000202276[Y], ENSG00000166452[C11orf17], ENSG00000176029[CK016_HUMAN], ENSG00000176009[ASCL3], ENSG00000175348[TMEM9B], ENSG00000175352[NRIP3], ENSG00000175356[SCUBE2], ENSG00000188500[Q52M56…	0		1	ENSG00000166452[C11orf17],	1	1	0	1	0	0	1	0	1	1	1	0	1	1	0	0	0	0	1	1	0	0	1	0	1	1	0	1	0
11p15.2-p15.1	15387054	16280173	0.89312	55% (16/29)	0.00266533	1	ENSG00000110693[SOX6],	1	ENSG00000110693[SOX6],	0		0	0	1	1	1	1	1	0	1	1	1	0	1	1	0	1	0	0	0	1	0	0	0	0	1	1	1	1	0
11p15.1	18386876	19433497	1.04662	48% (14/29)	0.00266533	14	ENSG00000166796[LDHC], ENSG00000166800[LDHAL6A], ENSG00000074319[TSG101], ENSG00000151116[UEVLD], ENSG00000179119[SPTY2D1], ENSG00000151117[TMEM86A], ENSG00000179057[IGSF22], ENSG00000110786[PTPN5], ENSG00000170255[MRGPRX1], ENSG00000183695[MRGPRX2], ENSG00000177054[ZDHHC13], ENSG00000129170[CSRP3], ENSG00000129173[E2F8], ENSG00000200687[5S_rRNA],	1	ENSG00000151116[UEVLD],	1	ENSG00000151116[UEVLD],	1	0	0	1	1	0	1	0	1	1	1	0	1	1	0	0	0	0	1	1	0	0	1	0	1	0	0	1	0
11p14.3	24995116	25917470	0.922355	79% (23/29)	0.00266533	2	ENSG00000187398[LUZP2], ENSG00000148944[Q6PEB8_HUMAN],	0		0		0	0	0	1	1	1	0	1	1	1	1	1	0	1	1	1	1	1	1	1	1	1	1	1	1	0	1	1	1
11p11.2	44379066	44740265	0.3612	69% (20/29)	0.00266533	1	ENSG00000085117[CD82],	0		0		1	1	1	1	1	1	0	1	1	1	1	0	1	1	0	1	0	0	1	1	0	0	1	1	0	1	0	1	1
11p11.2	45631140	46810665	1.17953	52% (15/29)	0.00266533	23	ENSG00000175264[CHST1], ENSG00000205106[Q6N098_HUMAN], ENSG00000181830[SLC35C1], ENSG00000209698[--], ENSG00000121671[CRY2], ENSG00000121653[MAPK8IP1], ENSG00000121680[PEX16], ENSG00000165905[GYLTL1B], ENSG00000135365[PHF21A], ENSG00000206837[Y], ENSG00000157613[CREB3L1], ENSG00000149091[DGKZ], ENSG00000110492[MDK], ENSG00000180720[CHRM4], ENSG00000110497[NP_060219.2], ENSG00000180423[C11orf77], …	1	ENSG00000175220[ARHGAP1],	0		1	1	1	1	0	1	0	1	0	1	1	0	1	1	0	1	0	0	1	1	0	0	1	0	0	1	0	0	0
11p11.2	46810665	47638719	0.828055	55% (16/29)	0.00266533	27	ENSG00000175216[CKAP5], ENSG00000134569[LRP4], ENSG00000149179[C11orf49], ENSG00000149182[ZNF289], ENSG00000165912[PACSIN3], ENSG00000134574[DDB2], ENSG00000134575[ACP2], ENSG00000025434[NR1H3], ENSG00000110514[MADD], ENSG00000134571[MYBPC3], ENSG00000066336[SPI1], ENSG00000203453[--], ENSG00000165915[SLC39A13], ENSG00000165916[PSMC3], ENSG00000165917[RAPSN], ENSG00000209717[--], ENSG00000209720[…	1	ENSG00000165923[AGBL2],	1	ENSG00000165923[AGBL2],	1	1	0	1	0	1	1	1	1	1	1	0	1	1	0	0	0	0	1	1	0	0	1	1	0	1	0	0	0
11q12.1	56639457	57976581	1.33712	59% (17/29)	0.00266533	43	ENSG00000183908[LRRC55], ENSG00000134817[AGTRL1], ENSG00000149115[TNKS1BP1], ENSG00000149136[SSRP1], ENSG00000209769[--], ENSG00000109991[P2RX3], ENSG00000156575[PRG3], ENSG00000186652[PRG2], ENSG00000134802[SLC43A3], ENSG00000209773[--], ENSG00000209782[--], ENSG00000186907[RTN4RL2], ENSG00000149150[SLC43A1], ENSG00000134809[TIMM10], ENSG00000156587[UBE2L6], ENSG00000196853[Q9UN38_HUMAN], ENSG00…	2	ENSG00000149150[SLC43A1], ENSG00000149131[SERPING1],	0		1	1	1	1	1	1	1	1	1	0	1	0	1	1	0	0	0	0	1	1	0	1	1	1	0	0	0	0	0
11q13.2	67506335	67841141	0.334807	69% (20/29)	0.00266533	9	ENSG00000110057[UNC93B1], ENSG00000006534[ALDH3B1], ENSG00000110717[NDUFS8], ENSG00000110719[TCIRG1], ENSG00000110721[CHKA], ENSG00000110066[SUV420H1], ENSG00000210235[--], ENSG00000171067[NP_071733.1], ENSG00000162337[LRP5],	0		0		0	1	0	1	0	1	0	1	1	1	1	1	1	0	1	1	0	0	1	1	0	1	1	1	0	1	1	1	1
11q13.2-q13.3	68924361	69319751	0.395391	62% (18/29)	0.00266533	6	ENSG00000110092[CCND1], ENSG00000204579[NP_001004327.1], ENSG00000149716[ORAOV1], ENSG00000162344[FGF19], ENSG00000171013[Q14569_HUMAN], ENSG00000075388[FGF4],	0		0		1	1	1	1	1	1	1	1	1	1	1	0	1	1	1	0	0	0	1	1	0	0	1	0	0	1	0	0	0
11q13.4	71381658	72306555	0.924898	48% (14/29)	0.007996	23	ENSG00000137522[RNF121], ENSG00000137496[IL18BP], ENSG00000137497[NUMA1], ENSG00000204567[Q6ZTG9_HUMAN], ENSG00000206783[U6], ENSG00000184154[LRRC51], ENSG00000149357[C11orf59], ENSG00000210295[--], ENSG00000110200[C11orf51], ENSG00000110203[FOLR3], ENSG00000110195[FOLR1], ENSG00000165458[INPPL1], ENSG00000165457[FOLR2], ENSG00000165462[PHOX2A], ENSG00000172846[Q9NYS9_HUMAN], ENSG00000162129[CLPB…	0		0		1	0	1	0	1	1	1	1	1	1	1	0	1	1	1	0	0	0	0	1	0	0	0	0	0	1	0	0	0
11q23.3	116663894	117674788	1.0109	76% (22/29)	0.00266533	17	ENSG00000186318[BACE1], ENSG00000110274[CEP164], ENSG00000177103[DSCAML1], ENSG00000137731[FXYD2], ENSG00000137746[--], ENSG00000137726[FXYD6], ENSG00000137747[TMPRSS13], ENSG00000110324[IL10RA], ENSG00000198230[Q68DH1_HUMAN], ENSG00000200631[SRP_euk_arch], ENSG00000137648[TMPRSS4], ENSG00000177098[SCN4B], ENSG00000204329[Q6ZSE4_HUMAN], ENSG00000149575[SCN2B], ENSG00000160593[AMICA1], ENSG0000016…	3	ENSG00000186318[BACE1], ENSG00000177103[DSCAML1], ENSG00000137731[FXYD2],	1	ENSG00000177103[DSCAML1],	1	1	1	1	1	1	1	1	1	1	1	0	1	1	1	1	0	1	1	1	0	1	1	0	0	1	0	0	1
11q23.3	119042880	120039872	0.996993	69% (20/29)	0.00266533	10	ENSG00000110400[PVRL1], ENSG00000137699[TRIM29], ENSG00000176984[Q8N8C5_HUMAN], ENSG00000184232[OAF], ENSG00000137709[POU2F3], ENSG00000181264[TMEM136], ENSG00000196914[ARHGEF12], ENSG00000197316[Q8NI68_HUMAN], ENSG00000204306[--], ENSG00000149403[GRIK4],	0		0		1	1	1	0	1	1	1	0	1	1	1	0	1	1	1	1	0	1	1	1	0	1	1	0	0	1	0	0	1
11q24.2	124620255	125295224	0.67497	48% (14/29)	0.007996	16	ENSG00000165495[PKNOX2], ENSG00000211442[--], ENSG00000178815[XR_000882.1], ENSG00000149557[FEZ1], ENSG00000185409[XR_017796.1], ENSG00000149547[EI24], ENSG00000209174[--], ENSG00000134910[STT3A], ENSG00000149554[CHEK1], ENSG00000201234[U2], ENSG00000134940[ACRV1], ENSG00000171053[NP_612151.1], ENSG00000196844[C11orf38], ENSG00000198331[HYLS1], ENSG00000110060[PUS3], ENSG00000109832[DDX25],	0		0		0	0	1	1	1	1	1	0	1	0	1	0	1	1	1	0	0	1	1	0	0	1	0	0	0	1	0	0	0
11q24.2	125295224	125989009	0.693786	72% (21/29)	0.00266533	14	ENSG00000109832[DDX25], ENSG00000064309[CDON], ENSG00000165526[RPUSD4], ENSG00000197798[FAM118B], ENSG00000200977[U4], ENSG00000209216[--], ENSG00000182934[SRPR], ENSG00000110074[FOXRED1], ENSG00000209258[--], ENSG00000150455[TIRAP], ENSG00000110063[DCPS], ENSG00000209272[--], ENSG00000110080[ST3GAL4], ENSG00000149571[KIRREL3],	1	ENSG00000182934[SRPR],	0		1	1	1	1	1	1	1	1	1	1	1	0	1	1	1	1	0	1	1	1	0	1	0	0	0	1	0	1	0
11q24.2	125989009	126262374	0.273366	66% (19/29)	0.00266533	0		0		0		0	1	1	1	1	1	1	0	1	1	1	0	1	1	1	1	0	1	1	1	0	1	0	0	0	1	0	1	0
12p13.33-p13.32	2574262	3638525	1.06426	62% (18/29)	0.00533067	22	ENSG00000151067[CACNA1C], ENSG00000188775[Q6YL47_HUMAN], ENSG00000118975[341511], ENSG00000004478[FKBP4], ENSG00000111203[ITFG2], ENSG00000053702[NRIP2], ENSG00000203590[--], ENSG00000206044[--], ENSG00000111206[FOXM1], ENSG00000209362[--], ENSG00000171792[C12orf32], ENSG00000078246[TULP3], ENSG00000209043[--], ENSG00000197905[TEAD4], ENSG00000184127[XR_015218.1], ENSG00000011105[TSPAN9], ENSG000…	3	ENSG00000078246[TULP3], ENSG00000197905[TEAD4], ENSG00000011105[TSPAN9],	1	ENSG00000078246[TULP3],	1	1	1	1	0	1	1	0	1	1	1	0	1	1	1	1	0	0	0	1	0	1	1	1	0	0	0	1	0
12p13.31	6508128	7462590	0.954463	72% (21/29)	0.00266533	44	ENSG00000010292[NCAPD2], ENSG00000111640[GAPDH], ENSG00000010295[NP_542769.2], ENSG00000111641[NOL1], ENSG00000111642[CHD4], ENSG00000209377[SCARNA11], ENSG00000184574[GPR92], ENSG00000111644[ACRBP], ENSG00000111653[ING4], ENSG00000126746[ZNF384], ENSG00000171874[O15420_HUMAN], ENSG00000139200[NP_710152.1], ENSG00000111652[COPS7A], ENSG00000089693[MLF2], ENSG00000159335[PTMS], ENSG00000089692[LAG…	2	ENSG00000209384[SCARNA12], ENSG00000139197[PEX5],	3	ENSG00000111644[ACRBP], ENSG00000111664[GNB3], ENSG00000111671[SPSB2],	0	0	1	1	1	1	1	1	1	1	0	1	0	0	1	1	1	0	1	1	1	1	0	1	0	1	1	1	1
12q13.11	46369801	47106304	0.736504	55% (16/29)	0.007996	21	ENSG00000005175[NP_078880.1], ENSG00000111405[PP11_HUMAN], ENSG00000139210[Q99777_HUMAN], ENSG00000079337[RAPGEF3], ENSG00000061273[HDAC7A], ENSG00000205538[Q6ZVP1_HUMAN], ENSG00000111424[VDR], ENSG00000205537[Q6ZPC2_HUMAN], ENSG00000134291[TMEM106C], ENSG00000139219[COL2A1], ENSG00000079387[SENP1], ENSG00000201845[U6], ENSG00000186328[--], ENSG00000152556[PFKM], ENSG00000177981[ASB8], ENSG000001…	2	ENSG00000139219[COL2A1], ENSG00000079387[SENP1],	0		1	1	0	1	0	1	1	1	1	1	1	0	1	1	1	0	0	0	1	1	0	1	0	0	0	1	0	0	0
12q13.13	51376334	51738002	0.361669	52% (15/29)	0.007996	12	ENSG00000189182[KRT77], ENSG00000181735[XR_016515.1], ENSG00000185069[KRT76], ENSG00000186442[KRT3], ENSG00000170477[KRT4], ENSG00000185640[NP_787028.1], ENSG00000170423[KRT78], ENSG00000170421[KRT8], ENSG00000111057[KRT18], ENSG00000063046[EIF4B], ENSG00000185389[Q9P192_HUMAN], ENSG00000111077[TENC1],	1	ENSG00000185069[KRT76],	0		1	1	0	1	0	1	1	1	1	1	1	1	1	1	1	0	0	0	0	1	0	0	0	0	0	1	0	0	0
12q13.3	55293898	55933612	0.639715	52% (15/29)	0.007996	29	ENSG00000076108[BAZ2A], ENSG00000110955[ATP5B], ENSG00000199649[U59], ENSG00000207031[U59], ENSG00000110958[PTGES3], ENSG00000210375[--], ENSG00000196531[NACAP1], ENSG00000198056[PRIM1], ENSG00000025423[HSD17B6], ENSG00000203394[--], ENSG00000203393[--], ENSG00000210381[--], ENSG00000170426[NP_683695.1], ENSG00000139547[RDH16], ENSG00000166856[ADMR], ENSG00000188326[Q7Z4H2_HUMAN], ENSG00000166860…	1	ENSG00000182199[SHMT2],	0		1	1	0	1	0	1	1	1	1	1	1	0	1	1	1	0	0	0	1	1	0	0	0	0	0	1	0	0	0
12q13.3	55933612	56297490	0.363879	55% (16/29)	0.007996	16	ENSG00000179912[R3HDM2], ENSG00000201198[U6], ENSG00000182371[Q9UI61_HUMAN], ENSG00000175189[INHBC], ENSG00000139269[INHBE], ENSG00000111087[GLI1], ENSG00000123329[ARHGAP9], ENSG00000166986[MARS], ENSG00000175197[DDIT3], ENSG00000208028[hsa-mir-616], ENSG00000166987[MBD6], ENSG00000175203[DCTN2], ENSG00000155980[KIF5A], ENSG00000166908[PIP5K2C], ENSG00000178498[DTX3], ENSG00000135502[SLC26A10],	0		0		1	1	0	1	0	1	1	1	1	1	1	0	1	1	1	0	0	0	1	1	0	0	0	1	0	1	0	0	0
12q24.31-q24.32	123620041	124585462	0.965422	55% (16/29)	0.007996	8	ENSG00000073060[SCARB1], ENSG00000209201[--], ENSG00000150991[UBC], ENSG00000198136[XR_016700.1], ENSG00000150990[DHX37], ENSG00000184992[BRI3BP], ENSG00000081760[AACS], ENSG00000166240[Q96JN9_HUMAN],	0		1	ENSG00000150990[DHX37],	1	1	0	1	1	1	1	1	1	1	1	0	1	1	0	0	0	0	1	1	0	1	1	0	0	0	0	0	0
12q24.32	127348346	127842369	0.494024	62% (18/29)	0.00533067	1	ENSG00000181234[TMEM132C],	0		0		1	1	0	0	1	1	1	1	1	1	1	0	1	1	0	1	0	0	1	1	0	1	1	1	0	1	0	0	0
12q24.33	129167979	131346667	2.17869	59% (17/29)	0.007996	32	ENSG00000111432[FZD10], ENSG00000208935[--], ENSG00000208933[--], ENSG00000208931[--], ENSG00000125207[PIWIL1], ENSG00000060709[RIMBP2], ENSG00000111450[STX2], ENSG00000208928[--], ENSG00000199800[U6], ENSG00000132341[RAN], ENSG00000206850[Y], ENSG00000111452[GPR133], ENSG00000177213[Q96LP1_HUMAN], ENSG00000204605[Q6ZU76_HUMAN], ENSG00000187909[Q6ZRX8_HUMAN], ENSG00000204603[Q69YW3_HUMAN], ENSG00…	1	ENSG00000198598[MMP17],	0		1	0	0	0	1	1	1	1	1	1	1	0	1	1	0	1	0	0	1	1	0	1	1	0	0	1	0	0	1
13q12.11	19474666	20459519	0.984854	55% (16/29)	0.007996	12	ENSG00000121741[ZMYM2], ENSG00000203614[--], ENSG00000132953[XPO4], ENSG00000032742[IFT88], ENSG00000172458[IL17D], ENSG00000121743[GJA3], ENSG00000150456[NP_777588.1], ENSG00000165474[GJB2], ENSG00000150457[LATS2], ENSG00000200145[U2], ENSG00000121742[GJB6], ENSG00000165475[CRYL1],	0		0		1	0	1	1	1	1	1	0	0	0	1	0	0	0	0	1	0	1	1	0	1	0	0	1	0	1	1	1	1
13q12.3	28421532	29452428	1.0309	72% (21/29)	0.00266533	7	ENSG00000209047[--], ENSG00000132938[KIAA0774], ENSG00000179141[Q8N642_HUMAN], ENSG00000122042[UBL3], ENSG00000139514[SLC7A1], ENSG00000209484[--], ENSG00000122043[NP_001010918.1],	0		0		1	0	1	1	1	1	1	0	0	1	1	0	1	0	1	1	1	1	1	0	1	1	0	1	0	1	1	1	1
13q14.3	50863921	51798963	0.935043	72% (21/29)	0.00266533	15	ENSG00000102796[DHRS12], ENSG00000180358[XR_000601.1], ENSG00000123171[CCDC70], ENSG00000174893[CTAGE3], ENSG00000123191[ATP7B], ENSG00000136112[ALG11], ENSG00000204960[--], ENSG00000197168[NEK5], ENSG00000136098[NEK3], ENSG00000197585[Q5JV89_HUMAN], ENSG00000209752[--], ENSG00000102786[INTS6], ENSG00000206920[Y], ENSG00000139668[WDFY2], ENSG00000209736[--],	0		0		1	0	1	1	1	1	1	0	1	1	1	0	1	0	1	1	1	1	1	0	1	0	0	1	0	1	1	1	1
13q21.1	56173423	57145944	0.972522	62% (18/29)	0.00533067	7	ENSG00000204919[NP_940843.1], ENSG00000204918[NP_940843.1], ENSG00000204917[NP_940843.1], ENSG00000204916[NP_940843.1], ENSG00000204914[NP_940843.1], ENSG00000118946[PCDH17], ENSG00000201665[7SK],	0		0		1	0	1	1	1	1	0	0	0	0	0	1	1	1	1	1	0	1	1	0	1	0	0	1	0	1	1	1	1
13q34	109974019	111177189	1.20317	69% (20/29)	0.00266533	10	ENSG00000139832[RAB20], ENSG00000183372[Q8N1R6_HUMAN], ENSG00000153481[NP_060680.1], ENSG00000134905[NP_078813.1], ENSG00000153487[ING1], ENSG00000184297[C13orf29], ENSG00000088448[ANKRD10], ENSG00000102606[ARHGEF7], ENSG00000153495[C13orf16], ENSG00000204398[Q5T400_HUMAN],	0		0		0	1	1	1	0	1	1	0	1	1	1	0	1	0	1	1	1	1	1	0	1	1	0	1	0	1	0	1	1
13q34	112447629	113314419	0.866791	69% (20/29)	0.00266533	15	ENSG00000139842[CUL4A], ENSG00000126217[MCF2L], ENSG00000185896[LAMP1], ENSG00000139835[GRTP1], ENSG00000204354[NP_001003399.1], ENSG00000057593[F7], ENSG00000153531[ADPRHL1], ENSG00000126218[F10], ENSG00000150401[DCUN1D2], ENSG00000126231[PROZ], ENSG00000150403[TMCO3], ENSG00000198176[TFDP1], ENSG00000126226[PCID2], ENSG00000068650[ATP11A], ENSG00000202347[U1],	0		1	ENSG00000139842[CUL4A],	1	0	1	1	0	1	1	0	1	0	1	0	1	1	1	1	1	1	1	1	0	0	1	1	0	1	0	1	1
13q34	113314419	113889199	0.574781	66% (19/29)	0.00266533	7	ENSG00000198176[TFDP1], ENSG00000186009[ATP4B], ENSG00000185974[GRK1], ENSG00000183087[GAS6], ENSG00000204346[NP_001034888.1], ENSG00000184497[FAM70B], ENSG00000185989[RASA3],	2	ENSG00000183087[GAS6], ENSG00000185989[RASA3],	1	ENSG00000185989[RASA3],	1	0	1	1	0	1	0	0	1	1	1	0	1	1	1	1	1	1	1	0	0	0	1	1	0	1	0	1	1
14q23.2-q23.3	63857023	64714123	0.857101	66% (19/29)	0.00533067	15	ENSG00000207238[U2], ENSG00000140009[ESR2], ENSG00000100714[MTHFD1], ENSG00000179841[AKAP5], ENSG00000089775[ZBTB25], ENSG00000126804[ZBTB1], ENSG00000126803[HSPA2], ENSG00000165807[C14orf50], ENSG00000126822[PLEKHG3], ENSG00000070182[SPTB], ENSG00000197195[CHURC1], ENSG00000176153[GPX2], ENSG00000139998[RAB15], ENSG00000125954[FNTB], ENSG00000125952[MAX],	0		0		1	0	1	1	1	1	1	0	1	1	1	1	1	1	1	1	0	1	1	0	0	0	1	1	0	1	0	0	0
14q24.1	68200579	68551084	0.350506	66% (19/29)	0.007996	4	ENSG00000185650[ZFP36L1], ENSG00000183619[NP_997325.1], ENSG00000072110[ACTN1], ENSG00000207089[U6],	0		0		1	1	1	1	0	1	1	0	1	1	1	1	1	1	1	1	0	0	1	0	0	0	1	1	0	1	0	0	1
14q24.2-q24.3	71752669	73068547	1.31588	72% (21/29)	0.00266533	17	ENSG00000206751[Y], ENSG00000182732[RGS6], ENSG00000205683[DPF3], ENSG00000119599[WDR21A], ENSG00000165861[ZFYVE1], ENSG00000119707[RBM25], ENSG00000080815[PSEN1], ENSG00000100767[PAPLN], ENSG00000133961[NUMB], ENSG00000187105[NP_976054.1], ENSG00000209100[--], ENSG00000176043[--], ENSG00000203538[--], ENSG00000170468[C14orf169], ENSG00000210188[--], ENSG00000210212[--], ENSG00000203540[--],	1	ENSG00000133961[NUMB],	0		1	0	1	1	1	1	1	0	1	1	1	1	1	1	1	1	0	1	1	0	0	1	0	1	0	1	1	0	1
14q24.3	73068547	74135997	1.06745	69% (20/29)	0.00533067	34	ENSG00000187105[NP_976054.1], ENSG00000184227[ACOT1], ENSG00000119673[ACOT2], ENSG00000177465[ACOT4], ENSG00000205669[NP_001032239.1], ENSG00000119661[DNAL1], ENSG00000176903[PNMA1], ENSG00000156030[NP_919254.2], ENSG00000140043[ZADH1], ENSG00000119725[ZNF410], ENSG00000156050[CN044_HUMAN], ENSG00000119723[COQ6], ENSG00000187097[ENTPD5], ENSG00000119636[C14orf45], ENSG00000119711[ALDH6A1], ENSG00…	0		1	ENSG00000119711[ALDH6A1],	1	1	1	1	0	1	1	0	1	1	1	1	1	1	1	1	0	0	1	0	0	1	1	1	0	1	0	0	1
14q24.3	76242700	78219740	1.97704	66% (19/29)	0.007996	32	ENSG00000071246[VASH1], ENSG00000013523[ANGEL1], ENSG00000100565[C14orf166B], ENSG00000119669[CN004_HUMAN], ENSG00000198894[KIAA1737], ENSG00000201384[snoACA32], ENSG00000177108[ZDHHC22], ENSG00000205599[Q6ZUY4_HUMAN], ENSG00000165548[TMEM63C], ENSG00000165553[NGB], ENSG00000009830[POMT2], ENSG00000100577[GSTZ1], ENSG00000100580[TMED8], ENSG00000100583[NP_001010860.1], ENSG00000165555[C14orf148],…	0		0		1	0	1	1	1	1	1	0	1	1	1	1	1	1	1	1	0	1	1	0	0	0	1	1	0	1	0	0	0
14q32.12-q32.13	92084096	93355719	1.27162	55% (16/29)	0.007996	14	ENSG00000100599[RIN3], ENSG00000100600[LGMN], ENSG00000066455[GOLGA5], ENSG00000100604[CHGA], ENSG00000100605[ITPK1], ENSG00000165943[MOAP1], ENSG00000153485[CN109_HUMAN], ENSG00000170270[CN142_HUMAN], ENSG00000012963[CN130_HUMAN], ENSG00000011114[BTBD7], ENSG00000133958[NP_065869.2], ENSG00000187581[COX8C], ENSG00000175785[PRIMA1], ENSG00000202306[Y],	1	ENSG00000012963[CN130_HUMAN],	0		1	1	1	1	0	1	1	0	1	1	1	1	1	1	0	0	0	0	1	0	0	0	1	1	0	1	0	0	0
14q32.13	93355719	94501808	1.14609	76% (22/29)	0.00266533	21	ENSG00000089737[DDX24], ENSG00000165948[FAM14B], ENSG00000165949[IFI27], ENSG00000119632[FAM14A], ENSG00000119698[KIAA1622], ENSG00000140093[SERPINA10], ENSG00000170099[SERPINA6], ENSG00000165951[SERPINA2], ENSG00000197249[SERPINA1], ENSG00000186910[SERPINA11], ENSG00000170054[SERPINA9], ENSG00000165953[SERPINA12], ENSG00000100665[SERPINA4], ENSG00000188488[SERPINA5], ENSG00000196136[SERPINA3], E…	4	ENSG00000170099[SERPINA6], ENSG00000100665[SERPINA4], ENSG00000188488[SERPINA5], ENSG00000196136[SERPINA3],	0		1	1	1	1	1	1	1	0	0	1	1	1	1	1	1	1	0	1	1	0	0	1	1	1	0	1	1	0	1
14q32.2	98544476	99772097	1.22762	79% (23/29)	0.00266533	16	ENSG00000127152[BCL11B], ENSG00000183576[SETD3], ENSG00000090061[CCNK], ENSG00000182505[Q9H669_HUMAN], ENSG00000176581[CN065_HUMAN], ENSG00000205476[--], ENSG00000205475[Q6ZVZ4_HUMAN], ENSG00000182218[KIAA1822], ENSG00000036530[CYP46A1], ENSG00000066629[EML1], ENSG00000196405[EVL], ENSG00000168350[DEGS2], ENSG00000200506[Y], ENSG00000199836[U1], ENSG00000199789[U6], ENSG00000199082[hsa-mir-342],	1	ENSG00000196405[EVL],	0		1	1	1	1	1	1	1	0	0	1	1	1	1	1	1	1	1	1	1	0	0	1	1	1	1	1	0	0	1
14q32.32-q32.31	99772097	101675923	1.90383	69% (20/29)	0.00533067	109	ENSG00000200279[sno_14q_I_II], ENSG00000199798[sno_14q_I_II], ENSG00000201899[sno_14q_I_II], ENSG00000100811[YY1], ENSG00000197119[SLC25A29], ENSG00000140107[NP_997000.2], ENSG00000140105[WARS], ENSG00000201036[sno_14q_I_II], ENSG00000201672[sno_14q_I_II], ENSG00000176473[WDR25], ENSG00000183092[BEGIN_HUMAN], ENSG00000196273[NP_001007561.1], ENSG00000185559[DLK1], ENSG00000201950[sno_14q_I_II], E…	1	ENSG00000197102[DYNC1H1],	1	ENSG00000197102[DYNC1H1],	1	1	1	1	1	1	1	0	0	1	1	1	1	1	1	1	0	1	1	0	0	0	1	1	0	1	0	0	1
15q22.31	64361643	64784280	0.422638	79% (23/29)	0.00266533	14	ENSG00000200623[U18], ENSG00000199574[U18], ENSG00000199673[U16], ENSG00000211325[--], ENSG00000166938[NP_588616.1], ENSG00000075131[TIPIN], ENSG00000169032[MAP2K1], ENSG00000174446[SNAPC5], ENSG00000174444[RPL4], ENSG00000202529[U18], ENSG00000174442[ZWILCH], ENSG00000188501[LCTL], ENSG00000137834[SMAD6], ENSG00000211321[--],	0		0		1	1	1	1	1	1	1	1	1	1	1	1	1	1	1	0	1	1	1	1	1	1	1	0	0	1	0	0	0
15q22.31-q22.32	64784280	64950441	0.166162	76% (22/29)	0.00266533	1	ENSG00000137834[SMAD6],	0		0		1	1	0	1	1	1	1	1	1	1	1	0	1	0	1	0	1	1	1	1	1	1	1	1	0	1	0	0	1
15q23	67036885	68382017	1.34513	62% (18/29)	0.007996	13	ENSG00000211370[--], ENSG00000209038[--], ENSG00000207119[U3], ENSG00000200216[U6], ENSG00000137819[PAQR5], ENSG00000137807[KIF23], ENSG00000137818[RPLP1], ENSG00000140332[TLE3], ENSG00000207395[Y], ENSG00000137808[NOX5], ENSG00000176363[TMEM84], ENSG00000138604[GLCE], ENSG00000207965[hsa-mir-629],	0		0		1	0	0	1	1	1	0	1	1	1	1	0	1	0	1	0	0	1	1	1	1	1	1	0	0	1	0	0	1
15q24.1	71595328	72347927	0.7526	69% (20/29)	0.007996	15	ENSG00000159289[GOLGA6], ENSG00000167178[ISLR2], ENSG00000129009[ISLR], ENSG00000137868[STRA6], ENSG00000140481[CCDC33], ENSG00000183324[NP_001035826.1], ENSG00000156642[NPTN], ENSG00000103855[CD276], ENSG00000211428[--], ENSG00000205363[NP_001034703.1], ENSG00000167139[TBC1D21], ENSG00000129038[LOXL1], ENSG00000067221[STOML1], ENSG00000140464[PML], ENSG00000188447[XR_016015.1],	0		0		1	0	0	1	1	1	0	1	1	1	1	0	1	1	0	0	1	1	1	1	1	1	1	1	0	1	0	0	1
15q24.1-q24.2	72347927	73717297	1.36937	62% (18/29)	0.007996	36	ENSG00000199580[Y], ENSG00000209289[--], ENSG00000167173[C15orf39], ENSG00000167195[NP_061122.4], ENSG00000205333[--], ENSG00000188144[XR_017996.1], ENSG00000140365[COMMD4], ENSG00000140481[CCDC33], ENSG00000140398[NEIL1], ENSG00000203473[--], ENSG00000140459[CYP11A1], ENSG00000140400[MAN2C1], ENSG00000169375[SIN3A], ENSG00000138623[SEMA7A], ENSG00000169410[PTPN9], ENSG00000211432[--], ENSG000001…	0		0		1	1	0	1	1	1	0	1	1	1	1	1	1	1	1	0	0	0	1	1	0	1	1	0	0	1	0	0	0
16p13.3	1587544	2778228	1.19068	66% (19/29)	0.00533067	73	ENSG00000206061[Q96RY6_HUMAN], ENSG00000007545[CRAMP1L], ENSG00000206053[HN1L_HUMAN], ENSG00000138834[MAPK8IP3], ENSG00000167964[RAB26], ENSG00000103024[NME3], ENSG00000074071[MRPS34], ENSG00000197774[EME2], ENSG00000162032[SPSB3], ENSG00000095906[NUBP2], ENSG00000099769[IGFALS], ENSG00000063854[HAGH], ENSG00000180185[FAHD1], ENSG00000131653[TRAF7], ENSG00000200196[SRP_euk_arch], ENSG00000167971[…	3	ENSG00000205937[RNPS1], ENSG00000162062[NP_079384.2], ENSG00000162068[NTN2L],	1	ENSG00000162062[NP_079384.2],	1	1	1	1	1	1	0	0	1	1	0	0	1	1	1	0	1	1	0	1	0	0	1	1	1	1	0	0	1
16q12.1	47425529	48745471	1.31994	79% (23/29)	0.00266533	9	ENSG00000202370[U70], ENSG00000102924[CBLN1], ENSG00000188847[Q6ZQT6_HUMAN], ENSG00000166152[C16orf78], ENSG00000102935[ZNF423], ENSG00000205423[C16orf69], ENSG00000202124[Y], ENSG00000155393[HEATR3], ENSG00000121274[Q8NDF8-3],	0		0		1	1	1	1	1	1	1	0	1	1	1	0	1	1	1	1	1	1	1	0	1	1	1	1	1	0	0	1	0
16q12.1	48745471	49438880	0.69341	59% (17/29)	0.007996	10	ENSG00000210233[--], ENSG00000210236[--], ENSG00000121274[Q8NDF8-3], ENSG00000121281[ADCY7], ENSG00000166164[BRD7], ENSG00000140807[NKD1], ENSG00000205414[Q6ZVL8_HUMAN], ENSG00000167208[NP_878274.1], ENSG00000167207[CARD15], ENSG00000083799[CYLD],	0		0		1	1	1	0	1	1	1	0	0	1	1	0	1	0	1	1	0	1	1	0	1	1	0	0	1	0	0	1	0
16q13-q21	55862616	57274342	1.41173	72% (21/29)	0.007996	38	ENSG00000200556[U6], ENSG00000207173[Y], ENSG00000206952[snoACA50], ENSG00000206833[U6], ENSG00000210346[--], ENSG00000140854[KATNB1], ENSG00000140859[KIFC3], ENSG00000207493[snoACA46], ENSG00000103042[NP_060701.1], ENSG00000102934[PLLP], ENSG00000102962[CCL22], ENSG00000187185[Q86VG7_HUMAN], ENSG00000006210[CX3CL1], ENSG00000070729[CNGB1], ENSG00000210341[--], ENSG00000102970[CCL17], ENSG0000019…	1	ENSG00000006210[CX3CL1],	1	ENSG00000103021[CCDC113],	1	1	1	1	1	1	1	0	0	1	1	0	1	1	1	0	1	0	1	1	1	0	1	1	1	0	0	1	1
16q22.1-q22.3	68772637	69838272	1.06564	79% (23/29)	0.00266533	22	ENSG00000210682[--], ENSG00000157335[NP_775890.2], ENSG00000177242[--], ENSG00000205152[--], ENSG00000209021[--], ENSG00000200153[U6], ENSG00000157344[EXOSC6], ENSG00000090861[AARS], ENSG00000157349[DDX19B], ENSG00000168872[DDX19A], ENSG00000157350[ST3GAL2], ENSG00000157353[FUK], ENSG00000103051[COG4], ENSG00000189091[SF3B3], ENSG00000157368[C16orf77], ENSG00000132613[NP_612392.1], ENSG0000018345…	0		0		1	1	1	1	1	1	1	0	1	1	1	0	1	0	1	1	0	1	1	1	1	1	1	1	1	0	0	1	1
16q23.2-q23.3	80081035	80724598	0.643564	72% (21/29)	0.007996	8	ENSG00000200543[7SK], ENSG00000153815[NP_938204.1], ENSG00000197943[PLCG2], ENSG00000184860[NP_660151.1], ENSG00000086696[HSD17B2], ENSG00000210850[--], ENSG00000210844[--], ENSG00000210827[--],	0		0		1	1	1	0	0	1	1	0	1	1	1	0	1	0	1	1	1	1	1	1	1	0	1	1	1	0	0	1	1
17p13.3	904325	1234734	0.33041	83% (24/29)	0.00266533	5	ENSG00000159842[ABR], ENSG00000205899[Q7RTU4_HUMAN], ENSG00000184811[TUSC5], ENSG00000209456[--], ENSG00000108953[YWHAE],	0		0		1	1	1	1	0	1	1	1	1	1	1	1	1	1	1	1	1	1	1	1	1	0	1	1	0	0	0	1	1
17p13.3-p13.2	2867989	3722909	0.854921	76% (22/29)	0.00533067	29	ENSG00000132359[GARNL4], ENSG00000203592[--], ENSG00000182880[OR1D5], ENSG00000184166[OR1D2], ENSG00000142163[--], ENSG00000183024[OR1G1], ENSG00000180144[Q8NH06_HUMAN], ENSG00000172150[OR1A2], ENSG00000172146[OR1A1], ENSG00000205813[OR3A2], ENSG00000180090[OR3A1], ENSG00000180068[OR3A4], ENSG00000180042[--], ENSG00000180016[OR1E1], ENSG00000159961[OR3A3], ENSG00000203591[--], ENSG00000127780[OR1…	0		0		0	0	1	1	1	0	1	1	1	1	1	1	0	1	1	1	1	1	1	1	1	1	0	0	1	0	1	1	1
17p13.2	3722909	4467178	0.74427	83% (24/29)	0.00266533	17	ENSG00000004660[CAMKK1], ENSG00000108405[P2RX1], ENSG00000074370[ATP2A3], ENSG00000074755[ZZEF1], ENSG00000182335[Q8TE90_HUMAN], ENSG00000209497[--], ENSG00000167740[CYB5D2], ENSG00000185722[ANKFY1], ENSG00000200584[Y], ENSG00000207390[Y], ENSG00000132388[UBE2G1], ENSG00000209516[--], ENSG00000182557[NP_872344.2], ENSG00000183018[Q8IVW8_HUMAN], ENSG00000132382[MYBBP1A], ENSG00000167741[GGT6], ENS…	0		0		0	1	1	1	1	1	1	1	1	1	1	1	0	1	1	1	1	1	1	1	1	1	1	1	0	0	0	1	1
17p13.2	4467178	4958111	0.490934	86% (25/29)	0.00266533	29	ENSG00000209521[--], ENSG00000161905[ALOX15], ENSG00000141456[PELP1], ENSG00000141480[ARRB2], ENSG00000161920[MED11], ENSG00000161921[CXCL16], ENSG00000141497[ZMYND15], ENSG00000142484[TM4SF5], ENSG00000182853[VMO1], ENSG00000182327[NP_001014985.1], ENSG00000142507[PSMB6], ENSG00000129219[PLD2], ENSG00000184637[--], ENSG00000141503[MINK1], ENSG00000108556[CHRNE], ENSG00000205710[Q6ZR85_HUMAN], EN…	3	ENSG00000129219[PLD2], ENSG00000108528[SLC25A11], ENSG00000091640[SPAG7],	1	ENSG00000091640[SPAG7],	1	0	1	1	1	1	1	1	1	1	1	1	1	0	1	1	1	1	1	1	1	1	1	1	1	0	0	1	1
17p13.2	5618721	6517938	0.899218	100% (29/29)	0.00266533	9	ENSG00000179314[NP_056068.1], ENSG00000206618[U6], ENSG00000129221[AIPL1], ENSG00000129195[FAM64A], ENSG00000091622[PITPNM3], ENSG00000198920[KIAA0753], ENSG00000200914[5S_rRNA], ENSG00000129235[TXNL5], ENSG00000108590[MED31],	0		0		1	1	1	1	1	1	1	1	1	1	1	1	1	1	1	1	1	1	1	1	1	1	1	1	1	1	1	1	1
17p13.2-p13.1	6517938	7151349	0.633412	76% (22/29)	0.00533067	30	ENSG00000141485[SLC13A5], ENSG00000132530[NP_059993.2], ENSG00000177294[FBXO39], ENSG00000167858[TEKT1], ENSG00000188101[XR_000632.1], ENSG00000200865[5S_rRNA], ENSG00000108839[ALOX12], ENSG00000141498[Q9P0C7_HUMAN], ENSG00000161939[C17orf49], ENSG00000207929[hsa-mir-195], ENSG00000207791[hsa-mir-497], ENSG00000161940[BCL6B], ENSG00000174327[SLC16A13], ENSG00000174326[SLC16A11], ENSG00000132514[C…	0		0		1	0	1	1	1	1	1	1	1	0	1	1	1	1	1	1	1	1	1	1	1	0	1	1	0	0	0	1	0
17p13.1	7151349	7483027	0.331679	93% (27/29)	0.00266533	30	ENSG00000132507[EIF5A], ENSG00000132522[GPS2], ENSG00000072818[KCTD11], ENSG00000205546[Q6ZTL2_HUMAN], ENSG00000182896[TMEM95], ENSG00000174292[TNK1], ENSG00000187838[PLSCR3], ENSG00000205544[C17orf61], ENSG00000169992[NLGN2], ENSG00000181323[C17orf83], ENSG00000184560[C17orf74], ENSG00000181284[TMEM102], ENSG00000161958[FGF11], ENSG00000170175[CHRNB1], ENSG00000174282[ZBTB4], ENSG00000183488[AMA…	1	ENSG00000132522[GPS2],	0		1	1	1	1	1	1	1	1	1	1	1	1	1	1	1	1	1	1	1	1	1	1	1	1	1	0	0	1	1
17p13.1	7483027	7590358	0.107332	79% (23/29)	0.00266533	5	ENSG00000129244[ATP1B2], ENSG00000141510[TP53], ENSG00000141499[WDR79], ENSG00000108947[EFNB3], ENSG00000183914[DNAH2],	1	ENSG00000129244[ATP1B2],	0		1	1	1	1	1	1	1	1	1	1	1	1	1	1	0	1	1	0	1	1	1	0	1	1	0	0	0	1	1
17p13.1	7590358	8066706	0.476349	90% (26/29)	0.00266533	24	ENSG00000183914[DNAH2], ENSG00000132510[JMJD3], ENSG00000167874[TMEM88], ENSG00000183011[LSMD1], ENSG00000182224[CYB5D1], ENSG00000205498[Q6ZRB7_HUMAN], ENSG00000170004[CHD3], ENSG00000179859[284023], ENSG00000170049[KCNAB3], ENSG00000170043[TRAPPC1], ENSG00000170037[CNTROB], ENSG00000132518[GUCY2D], ENSG00000179593[ALOX15B], ENSG00000179477[ALOX12B], ENSG00000179148[ALOXE3], ENSG00000179111[HES7…	2	ENSG00000170004[CHD3], ENSG00000132518[GUCY2D],	0		1	0	1	1	1	1	1	1	1	1	1	1	1	1	1	1	1	1	1	1	1	1	1	1	1	0	0	1	1
17p13.1	8066706	9024661	0.957956	72% (21/29)	0.007996	22	ENSG00000178977[Q8NAT9_HUMAN], ENSG00000178971[C17orf68], ENSG00000178921[PFAS], ENSG00000125434[SLC25A35], ENSG00000108961[NP_057576.2], ENSG00000198844[ARHGEF15], ENSG00000209602[--], ENSG00000184650[ODF4], ENSG00000178854[Q8N1U9_HUMAN], ENSG00000184619[KRBA2], ENSG00000161970[RPL26], ENSG00000189051[643904], ENSG00000166579[NDEL1], ENSG00000133026[MYH10], ENSG00000200199[U7], ENSG00000209611[-…	1	ENSG00000133026[MYH10],	1	ENSG00000133026[MYH10],	0	0	1	1	1	1	1	1	1	0	1	1	0	1	1	1	1	1	1	0	1	1	0	1	0	0	1	1	1
17p13.1	9024661	9846646	0.821986	93% (27/29)	0.00266533	8	ENSG00000065320[NTN1], ENSG00000170310[STX8], ENSG00000166596[WDR16], ENSG00000154914[USP43], ENSG00000184544[DHRS7C], ENSG00000065325[GLP2R], ENSG00000109047[RCV1], ENSG00000007237[GAS7],	0		0		1	1	1	1	1	1	1	1	1	1	1	1	1	1	1	1	1	1	1	1	1	1	0	1	1	0	1	1	1
17p13.1	9846646	11078664	1.23202	90% (26/29)	0.00266533	16	ENSG00000007237[GAS7], ENSG00000180683[Q8N7A4_HUMAN], ENSG00000006788[MYH13], ENSG00000133020[MYH8], ENSG00000141048[MYH4], ENSG00000109061[MYH1], ENSG00000125414[MYH2], ENSG00000109063[MYH3], ENSG00000133028[SCO1], ENSG00000170222[C17orf48], ENSG00000187824[NP_001004313.1], ENSG00000205351[--], ENSG00000188265[644139], ENSG00000207242[U6], ENSG00000199374[5S_rRNA], ENSG00000209634[--],	0		0		1	0	1	1	1	1	1	1	1	1	1	1	1	1	1	1	1	1	1	1	1	1	0	1	1	0	1	1	1
17p12	12493762	13142916	0.649155	76% (22/29)	0.00533067	3	ENSG00000141052[MYOCD], ENSG00000006740[NP_055674.3], ENSG00000006744[ELAC2],	0		0		0	0	1	1	1	1	1	1	1	1	1	1	0	1	1	0	1	1	1	1	1	1	0	1	1	0	0	1	1
17p12	13142916	13812349	0.669434	79% (23/29)	0.00266533	1	ENSG00000153976[HS3ST3A1],	0		0		0	0	1	1	1	1	1	1	0	1	1	1	0	1	1	1	1	1	1	1	1	1	0	1	1	0	1	1	1
17p12-p11.2	14985200	16043971	1.05877	83% (24/29)	0.00266533	20	ENSG00000109099[PMP22], ENSG00000209646[--], ENSG00000125409[TEKT3], ENSG00000200437[U6], ENSG00000209661[--], ENSG00000175106[CDRT4], ENSG00000205322[Q6ZTS8_HUMAN], ENSG00000108442[FAM18B2], ENSG00000181464[Q9BXD7_HUMAN], ENSG00000108448[TRIM16], ENSG00000108452[ZNF29_HUMAN], ENSG00000187607[ZNF286], ENSG00000175091[Q2QD04_HUMAN], ENSG00000179277[--], ENSG00000170425[ADORA2B], ENSG00000011295[TT…	1	ENSG00000175106[CDRT4],	2	ENSG00000175106[CDRT4], ENSG00000141027[NCOR1],	0	1	1	1	1	1	1	1	1	1	1	1	0	1	1	1	1	1	0	1	1	1	0	1	1	0	1	1	1
17p11.2	17056300	17728675	0.672376	79% (23/29)	0.00266533	16	ENSG00000154803[FLCN], ENSG00000183815[Q9BSF7_HUMAN], ENSG00000141030[COPS3], ENSG00000205309[NT5M], ENSG00000184306[388344], ENSG00000201741[Y], ENSG00000141026[MED9], ENSG00000108551[RASD1], ENSG00000133027[PEMT], ENSG00000206730[U6], ENSG00000108557[RAI1], ENSG00000183564[SMCR5], ENSG00000072310[SREBF1], ENSG00000207839[hsa-mir-33b], ENSG00000175662[TOM1L2], ENSG00000203499[--],	0		0		1	0	1	1	1	1	1	1	1	1	1	1	1	1	1	1	1	0	0	1	1	0	1	1	1	0	0	1	1
17p11.2	17728675	18608326	0.879652	93% (27/29)	0.00266533	33	ENSG00000175662[TOM1L2], ENSG00000171962[LRRC48], ENSG00000201378[Y], ENSG00000171953[ATPAF2], ENSG00000141034[C17orf39], ENSG00000108591[DRG2], ENSG00000091536[MYO15A], ENSG00000209750[--], ENSG00000091542[ALKBH5], ENSG00000131899[LLGL1], ENSG00000179334[--], ENSG00000177731[FLII], ENSG00000177427[SMCR7], ENSG00000177302[TOP3A], ENSG00000176994[SMCR8], ENSG00000176974[SHMT1], ENSG00000203493[--]…	1	ENSG00000131899[LLGL1],	0		1	1	1	1	1	1	1	1	1	1	1	1	1	1	1	1	1	1	1	1	1	1	1	1	1	0	0	1	1
18q12.2	33167913	33958931	0.791019	83% (24/29)	0.007996	2	ENSG00000101489[BRUNOL4], ENSG00000211477[--],	0		0		0	0	0	1	1	1	1	1	0	1	1	0	1	1	1	1	1	1	1	1	1	1	1	1	1	1	1	1	1
18q12.3	40728393	41615453	0.887061	79% (23/29)	0.007996	3	ENSG00000152217[SETBP1], ENSG00000132874[SLC14A2], ENSG00000141469[SLC14A1],	0		0		0	0	0	1	1	1	1	1	0	1	1	1	1	1	1	1	1	0	1	1	1	1	1	1	1	0	1	1	1
18q21.1	42134467	42761168	0.626702	72% (21/29)	0.007996	4	ENSG00000141622[C18orf23], ENSG00000167210[LOXHD1], ENSG00000101638[ST8SIA5], ENSG00000078043[PIAS2],	0		0		1	0	0	1	1	0	1	1	1	1	1	1	1	0	0	1	1	1	1	0	1	1	1	1	1	0	1	0	1
18q21.1	43822359	44789979	0.967621	79% (23/29)	0.007996	8	ENSG00000200872[5S_rRNA], ENSG00000199513[U7], ENSG00000206944[U6], ENSG00000206174[Q6ZNX8_HUMAN], ENSG00000178388[CR012_HUMAN], ENSG00000134030[KIAA0427], ENSG00000101665[SMAD7], ENSG00000203611[--],	0		0		0	0	0	1	1	1	1	1	0	1	1	1	1	1	1	1	1	1	1	0	1	1	1	1	1	0	1	1	1
18q21.1	47698994	48240074	0.541081	48% (14/29)	0.00266533	1	ENSG00000187323[DCC],	0		0		0	0	0	0	0	0	1	0	1	0	1	0	0	1	0	1	1	1	0	0	1	1	0	1	1	0	1	1	1
18q21.32	54802485	55527614	0.72513	86% (25/29)	0.00266533	7	ENSG00000074657[ZNF532], ENSG00000166562[SEC11L3], ENSG00000134443[GRP], ENSG00000134438[RAX], ENSG00000166569[CPLX4], ENSG00000074695[LMAN1], ENSG00000183287[CCBE1],	0		0		0	1	0	1	1	1	1	1	1	1	1	0	1	1	1	1	1	1	1	1	1	1	1	1	1	0	1	1	1
18q23	75216552	75791828	0.575277	79% (23/29)	0.007996	9	ENSG00000166377[ATP9B], ENSG00000131196[NFATC1], ENSG00000198275[Q9NY04_HUMAN], ENSG00000178412[NP_872376.1], ENSG00000060069[CTDP1], ENSG00000205974[Q6ZVY3_HUMAN], ENSG00000178342[KCNG2], ENSG00000122490[PQLC1], ENSG00000203600[--],	0		0		1	0	0	1	0	1	0	1	1	1	1	1	1	1	1	1	1	1	1	1	1	1	1	0	1	0	1	1	1
19p13.3	5719662	6119317	0.399656	97% (28/29)	0.00266533	12	ENSG00000174898[TMEM146], ENSG00000141994[DUS3L], ENSG00000171119[NRTN], ENSG00000156413[FUT6], ENSG00000171124[FUT3], ENSG00000130383[FUT5], ENSG00000174886[NDUFA11], ENSG00000187650[NP_001017921.1], ENSG00000105519[CAPS], ENSG00000031823[RANBP3], ENSG00000087903[RFX2], ENSG00000130377[ACSBG2],	0		0		1	1	1	1	1	1	1	1	1	1	1	1	1	1	1	1	1	1	1	1	1	0	1	1	1	1	1	1	1
19p13.2-p13.13	12385101	13258496	0.873396	69% (20/29)	0.007996	39	ENSG00000180855[ZNF443], ENSG00000196826[ZNF709], ENSG00000196484[ZNF564], ENSG00000188033[ZNF490], ENSG00000173875[ZNF791], ENSG00000178464[XR_017237.1], ENSG00000104774[MAN2B1], ENSG00000105583[C19orf56], ENSG00000123154[MORG1_HUMAN], ENSG00000095059[DHPS], ENSG00000132004[FBXW9], ENSG00000105576[TNPO2], ENSG00000197015[--], ENSG00000209702[SNORD41], ENSG00000123144[C19orf43], ENSG00000198356[A…	2	ENSG00000167815[PRDX2], ENSG00000179218[CALR],	0		1	1	1	1	1	1	1	0	1	1	1	1	1	1	0	1	0	1	1	1	0	0	1	1	0	0	0	1	0
21q22.3	41614504	45077643	3.46314	66% (19/29)	0.00533067	80	ENSG00000173276[ZNF295], ENSG00000182852[CU121_HUMAN], ENSG00000205520[--], ENSG00000177398[UMODL1], ENSG00000160226[CU002_HUMAN], ENSG00000184385[CU128_HUMAN], ENSG00000160179[ABCG1], ENSG00000142185[TRPM2], ENSG00000160233[LRRC3], ENSG00000160180[TFF3], ENSG00000183637[CU030_HUMAN], ENSG00000160181[TFF2], ENSG00000175894[TSEAR_HUMAN], ENSG00000160182[TFF1], ENSG00000182912[CU090_HUMAN], ENSG000…	4	ENSG00000160226[CU002_HUMAN], ENSG00000160180[TFF3], ENSG00000160194[NDUFV3], ENSG00000183844[FAM3B],	1	ENSG00000160233[LRRC3],	1	0	1	1	1	1	1	0	0	1	1	0	1	0	1	1	1	1	0	1	1	0	1	1	1	0	1	0	0
21q22.3	45077643	46681189	1.60355	79% (23/29)	0.00266533	33	ENSG00000183255[PTTG1IP], ENSG00000160255[ITGB2], ENSG00000201124[U2], ENSG00000205437[C21orf69], ENSG00000183250[CU067_HUMAN], ENSG00000160256[C21orf70], ENSG00000183821[CU122_HUMAN], ENSG00000197381[ADARB1], ENSG00000184680[Q9NSI1_HUMAN], ENSG00000184941[Q9NSI0_HUMAN], ENSG00000182586[CU089_HUMAN], ENSG00000186866[POFUT2], ENSG00000184836[CU086_HUMAN], ENSG00000184274[CU093_HUMAN], ENSG00000099…	2	ENSG00000142156[COL6A1], ENSG00000142173[COL6A2],	0		1	1	1	1	0	1	1	0	1	1	1	1	1	1	1	1	1	1	0	1	1	1	1	1	1	0	1	0	0
Xp22.33	2629805	2868482	0.238678	86% (25/29)	0.00266533	5	ENSG00000002586[CD99], ENSG00000124343[XG], ENSG00000056998[GYG2], ENSG00000006756[ARSD], ENSG00000157399[ARSE],	2	ENSG00000006756[ARSD], ENSG00000157399[ARSE],	0		1	1	0	1	1	1	1	1	1	1	1	1	1	1	1	1	1	1	1	1	1	1	0	1	1	0	1	0	1
Xp22.31	6266074	7296019	1.02995	59% (17/29)	0.00266533	4	ENSG00000169059[VCX3A], ENSG00000186259[392425], ENSG00000130021[HDHD1A], ENSG00000101846[STS],	0		0		0	0	0	1	1	1	1	1	1	0	1	1	0	1	0	1	1	1	0	1	0	0	0	1	1	0	1	0	1
Xp11.4	41005795	41682060	0.676266	55% (16/29)	0.00266533	10	ENSG00000199564[5S_rRNA], ENSG00000206707[Y], ENSG00000124487[DDX3X], ENSG00000202369[SRP_euk_arch], ENSG00000188937[NYX], ENSG00000147044[CASK], ENSG00000210758[--], ENSG00000210760[--], ENSG00000171659[GPR34], ENSG00000171657[GPR82],	0		0		1	1	0	1	0	0	1	1	1	1	1	1	1	1	0	0	0	0	1	1	0	0	1	1	0	0	0	0	1
aGenes (total number and symbol) included in each MCR
bGenes whose transcript levels in PDAC or PanIN are consistent with their DNA copy number status identified in array CGH
cMCR output in each tumour sample. 1; genetic loss, 0; no copy number change
