# Supplementary material
Source: publisher figshare collection journal article supplement (https://karger.figshare.com/articles/dataset/_/5442418)

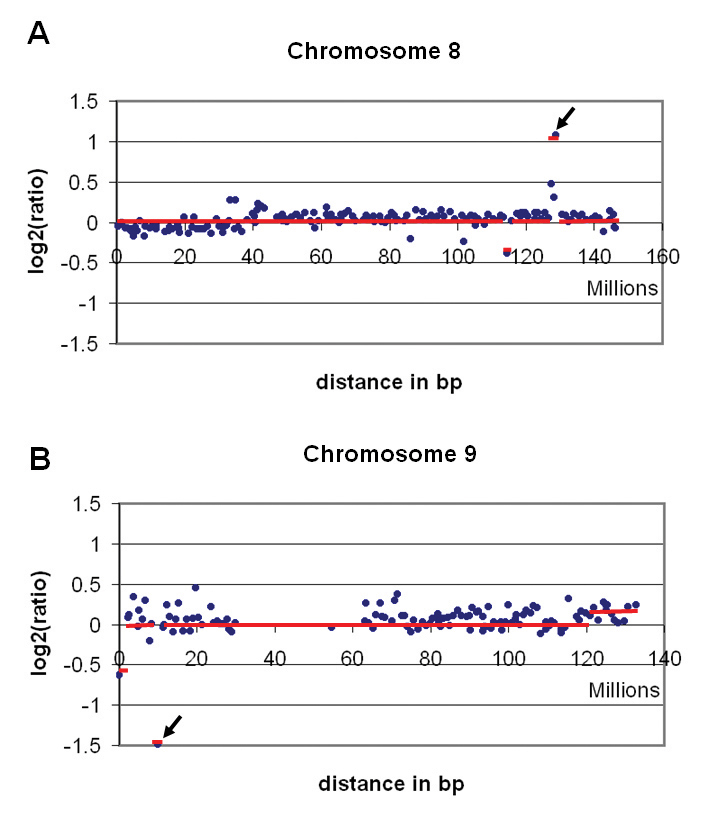

Supplement: Supplementary file 3 [file 1 › Fig2.jpg]
